# Supplementary material for: High-risk multimorbidity patterns on the road to cardiovascular mortality
Source: PubMed Central journal article supplement (PMC7063814; doi:10.1186/s12916-020-1508-1), 2020-03-10
Supplement: 12916_2020_1508_MOESM1_ESM.pdf [file 12916_2020_1508_MOESM1_ESM.pdf]

Supplementary Information for  
High-risk multimorbidity patterns on the road to cardiovascular  
mortality.

Nina Haug, Carola Deisinger, Michael Gyimesi, Alexandra Kautzky-Willer,  
Stefan Thurner and Peter Klimek

# S1 Clustering algorithm

The divisive hierarchical clustering algorithm which we use in this work is called DIVCLUS-T, and was presented in [1]. It is similar to the well established Ward’s minimum variance method [2] and the  $k$ -means algorithm [3, chap. 20] in that it aims to optimize the same objective function as these two clustering methods, but increases interpretability due to the fact that its results can be read like a decision tree.

The input data passed to the algorithm is in the form of a binary matrix  $\mathbf{X} \in \{0, 1\}^{M \times N}$ , recording  $M$  observations of  $N$  different features. The element of  $\mathbf{X}$  which stands in the  $i$ th row and  $j$ th column is denoted by  $X_{i,j}$ , where  $1 \leq i \leq M$  and  $1 \leq j \leq N$ . We also denote for  $1 \leq i \leq M$  the binary vector representing one particular observation by  $\mathbf{x}^{(i)} = (X_{i,1}, \dots, X_{i,N})$ . In our application, one row of  $\mathbf{X}$  corresponds to the health state of one patient, observed at a certain time, and each column corresponds to a particular block of diagnoses. For example, if column  $j$  represents the diagnosis block ‘Diabetes Mellitus’, then  $X_{i,j} = 1$  if the patient represented by row  $i$  has been diagnosed with diabetes until the point in time the observation was made, and 0 otherwise. In our implementation of the algorithm, the user further specifies a binary vector  $\mathbf{v} \in \{0, 1\}^N$ , a real, non-negative vector  $\mathbf{w} \in [0, \infty)^N$ , as well as two positive integers  $\theta$  and  $K$ .

Starting from the root node, the algorithm iteratively constructs a binary tree where each node  $k$  represents one particular subset  $S_k$  of the total set of observations  $S_0 = \{1, \dots, M\}$ , and  $S_k \supset S_j$  if and only if node  $k$  is an ancestor of node  $j$ ; the set  $S_0$  is represented by the root node. To each node  $k$  is further associated a vector  $\mathbf{p}^{(k)} = (p_1^{(k)}, \dots, p_N^{(k)}) \in [0, 1]^N$ , defined as

$$\mathbf{p}^{(k)} = \frac{1}{|S_k|} \sum_{i \in S_k} \mathbf{x}^{(i)}. \quad (1)$$

Geometrically,  $\mathbf{p}^{(k)}$  is the centroid of the  $|S_k|$  binary vectors represented by node  $k$ , embedded into  $\mathbb{R}^N$ . For  $1 \leq j \leq N$ , the value  $p_j^{(k)}$  is the probability that an observation, randomly selected from  $S_k$ , has feature  $j$ . The inertia of a node  $k$  is defined as

$$I_k = \sum_{i \in S_k} \|\mathbf{w} \circ (\mathbf{x}_i - \mathbf{p}^{(k)})\|_2^2 = |S_k| \mathbf{w} \cdot \left( \mathbf{p}^{(k)} \circ (\mathbf{1} - \mathbf{p}^{(k)}) \right), \quad (2)$$

where ‘ $\circ$ ’ denotes the coefficientwise product, ‘ $\cdot$ ’ is the Euclidean scalar product,  $\mathbf{1} = (1, \dots, 1)$  and  $\|\cdot\|_2$  denotes the Euclidean norm. For a given feature  $1 \leq j \leq N$ , the value  $p_j^{(k)}(1 - p_j^{(k)})$  is the variance of the set of points  $\{\mathbf{x}_i \mid i \in S_k\}$ , projected onto the  $j$ th axis. It can therefore be regarded as a measure for how homogeneous the observations belonging to  $S_k$  are with respect to feature  $j$ . The inertia  $I_k$  quantifies the overall inhomogeneity of the observations represented by node  $k$ , averaged over all the features, weighted according to the entries of  $\mathbf{w}$ . Note that our use of the letter  $\mathbf{w}$  differs from [1], where weights were assigned to observations.

Let after any number of iterations of the algorithm node  $k$  be a leaf node of the tree constructed thus far. To simplify the notation, we drop the index  $k$  and let  $S$  be the set of observations represented by that node. Define for a given feature  $1 \leq j \leq N$  the subsets  $S_0^j = \{i \in S \mid X_{i,j} = 0\}$  and  $S_1^j = \{i \in S \mid X_{i,j} = 1\}$ . Hence, the sets  $S_1^j$  and  $S_0^j$  partition the set  $S$  into those observations which do or do not have feature  $j$ , respectively. Among the features  $1 \leq j \leq N$  for which  $v_j = 1$ , the algorithm now selects the feature

$$j_0 = \operatorname{argmin}_{j \in J} \left( I_0^j + I_1^j \right), \quad (3)$$

where  $I_0^j$  and  $I_1^j$  are the inertias of  $S_0^j$  and  $S_1^j$ , respectively, and

$$J = \{1 \leq j \leq N \mid v_j = 1 \wedge \min(|S_0^j|, |S_1^j|) > \theta\}. \quad (4)$$

Node  $k$  now becomes the parent node of two newly created leaf nodes representing the subsets  $S_0^{j_0}$  and  $S_1^{j_0}$ , respectively. The feature  $j_0$  is hence the feature used to split up node  $k$ ; the binary vector  $\mathbf{v}$  specifies which features are allowed to be used to split up nodes.

After a certain number of iterations, the set  $J$  is empty for each leaf node, and the algorithm therefore stops. Assume that the number of leaves of the generated tree is  $L$  and denote the sum of the inertias of all leaves of this tree by  $F$ . By removing two leaves of the tree with common parent node, we obtain a pruned tree of  $L - 1$  leaves where the parent node is now a leaf. Denote the sum of the inertias of all leaves of this new tree by  $F'$ . We remove the pair of nodes with common parent node such that the difference  $F' - F$  is minimal. By repeating this procedure  $L - K$  times, we arrive at a tree with  $K$  nodes. We denote the sets represented by the leaves of this tree by  $C_1, \dots, C_K$ . They form a partition of the set  $S_0 = \{1, \dots, M\}$ , and hence give a clustering of the observations contained in  $\mathbf{X}$  into  $K$  disjoint subsets.

46 Suppose we are given a certain observation but do not know which cluster it belongs to. To determine the  
 47 cluster membership of that observation, we proceed as follows. We ask whether the feature which was used  
 48 to split up the root node is present in the observation or not, and, accordingly, we move on to the child node  
 49 of the root which has or does not have this feature, respectively, and so forth, until we arrive at a leaf node  
 50 (i.e., a cluster). The cluster membership of any observation can thus be determined by a finite sequence of  
 51 binary questions. It is this property which distinguishes it from Ward’s method and the  $k$ -means algorithm,  
 52 and which increases the interpretability of the results obtained. However, this comes at the cost of restricting  
 53 the set of possible cluster partitions, and therefore potentially less optimal solutions.

54 Specifically in this work, we set  $\theta = 1000$ ,  $\mathbf{v} = (1, 1, \dots, 1)$ , and the entries of the weight vector  $\mathbf{w} =$   
 55  $(w_1, \dots, w_N)$  are set as

$$w_j = -\lambda \ln(p_j) \quad \text{for } 1 \leq j \leq N, \quad (5)$$

56 where  $\lambda = N / \sum_{j=1}^N \ln(p_j)$ , with  $p_j = \frac{1}{M} \sum_{i=1}^M X_{i,j}$  being the probability that a randomly selected patient of  
 57 the cohort, observed at a randomly selected time in  $T$ , has been diagnosed with disease  $j$  so far. The quantity  
 58 on the right of Eq. (5) is known as the inverse document frequency (idf), a commonly used measure in text  
 59 analytics [4]. The idea behind idf is that terms appearing less frequently in a corpus of documents are more  
 60 distinctive to a text which contains them. In our context, documents correspond to observations and words  
 61 correspond to individual diseases.

62 The objective function aimed to be minimized by DIVCLUS-T is

$$F = \sum_{k=1}^K I_k, \quad (6)$$

63 where for  $1 \leq k \leq K$ ,  $I_k$  is the inertia of cluster  $k$ . In the case where  $\mathbf{w} = (1, \dots, 1)$ ,  $F$  is the same objective  
 64 function aimed to be minimized by Ward’s method and the  $k$ -means algorithm.

65 Note that DIVCLUS-T, as described here, can also be used for prediction purposes. For example, if we  
 66 set  $\mathbf{v} = (1, 1, \dots, 1, 0)$  and  $\mathbf{w} = (0, 0, \dots, 0, 1)$ , then the algorithm generates a decision tree predicting the  
 67 feature represented by the last column of  $\mathbf{X}$  based on all other features.

## 68 S2 Selection of the number of clusters

69 As in the last section, we denote by  $F$  the sum of the inertias of the leaf nodes of a clustering tree. The  
 70 mean cluster inertia of a clustering tree of  $K$  leaves is defined as  $f = \frac{F}{K}$ . In order to find out whether our set  
 71 of data points admits a natural partitioning into a certain number of clusters, in Fig. S9 we plot the mean  
 72 cluster inertia  $f$  against the number  $K$  of clusters. In case such a natural partitioning exists, one expects  
 73 that the mean cluster inertia decreases strongly as the number of clusters increases from one to the natural  
 74 number of clusters in the data, and less strongly as the number of clusters increases further. This plot shows  
 75 that the mean cluster inertia decreases strongly for small values of the number of clusters and less strongly  
 76 for larger numbers of clusters.

77 In order to quantify the effect of correlations in the data, as in the previous section we compute for each  
 78 disease block  $j$  the marginal probability  $p_j = \frac{1}{M} \sum_{i=1}^M X_{i,j}$ . Then we create a ranking  $r : \{1, \dots, N\} \rightarrow$   
 79  $\{1, \dots, N\}$  such that  $w_{r(i)} p_{r(i)} (1 - p_{r(i)}) > w_{r(j)} p_{r(j)} (1 - p_{r(j)})$  if  $i < j$ . For a given number of clusters  $K$  we  
 80 compute

$$\tilde{f} = \sum_{d=K}^N w_{r(d)} p_{r(d)} (1 - p_{r(d)}). \quad (7)$$

81 The value  $\tilde{f}$  is the expectation value of the mean cluster inertia obtained by randomly shuffling the ones of  
 82 the matrix  $\mathbf{X}$  independently in each column. The difference  $\tilde{f} - f$  indicates how strongly different diseases in  
 83 the data are correlated. The pink line in Fig. S9 shows the value of  $\tilde{f}$  as a function of  $K$ . We see that there  
 84 is a clear effect of correlations between different diagnoses in the data, which is made use of by our clustering  
 85 algorithm.

86 The choice  $K = 132$  is made as a trade-off between statistical robustness and homogeneity of the clus-  
 87 ters. Moreover, this value enables us to directly compare the performance of the algorithm with two simple  
 88 approaches used as benchmarks, as discussed in section S5.

## 89 S3 Robustness of our results

90 As explained in the methods section of the main article, the weight  $q_{s,g,i,j}$  is the rate at which patients of sex  
 91  $g$  and age group  $a$  step from cluster  $i$  to cluster  $j$ . This rate is computed by dividing the number  $s_{g,a,i,j}$  of

92 steps of patients with sex  $g$  from cluster  $i$  to cluster  $j$  in layer  $a$  by the number of observations  $\sum_{j=1}^K s_{g,a,i,j}$   
 93 (the size) of cluster  $i$  in layer  $a$  for sex  $g$ . If we consider our dataset as a realization of a certain stochastic  
 94 process, then  $q_{g,a,i,j}$  is an empirical estimation of the transition probability  $\hat{q}_{g,a,i,j}$  inherent to this process.  
 95 We call an edge weight robust if the width of the 95% confidence interval for the estimation of  $\hat{q}_{g,a,i,j}$  is  
 96 smaller than  $\lambda q_{g,a,i,j}$ , where  $\lambda = 0.2$ . To check if a given edge weight  $q_{g,a,i,j}$  is robust, we proceed as follows.

97 Let  $g, a, i$  and  $j$  be fixed and simplify the notation to  $p = q_{g,a,i,j}$ ,  $\hat{p} = \hat{q}_{g,a,i,j}$  and  $s = \sum_{j=1}^K s_{g,a,i,j}$ . The  
 98 empirical probability is a random variable

$$p = \frac{1}{s} \sum_{i=1}^s X_i, \quad (8)$$

99 where  $X_1, \dots, X_s$  are iid random variables with  $X_1 \sim \text{Bernoulli}(\hat{p})$ . It follows from the central limit theorem  
 100 that for  $s \rightarrow \infty$ ,

$$\sqrt{\frac{s}{\hat{p}(1-\hat{p})}}(p - \hat{p}) \xrightarrow{d} \mathcal{N}(0, 1), \quad (9)$$

101 where  $\xrightarrow{d}$  denotes convergence in distribution. This means that for  $\delta > 0$ ,

$$\lim_{s \rightarrow \infty} \mathbb{P}\left(\hat{p} \in \left[p - \delta \sqrt{\frac{\hat{p}(1-\hat{p})}{s}}, p + \delta \sqrt{\frac{\hat{p}(1-\hat{p})}{s}}\right]\right) = 2C(\delta) - 1, \quad (10)$$

where  $C(\cdot)$  is the cumulative distribution function of the standard normal distribution. For sufficiently large  
 $s$ , the condition that

$$\delta \sqrt{\frac{\hat{p}(1-\hat{p})}{s}} \leq \lambda p$$

102 is equivalent to  $p \geq \delta^2 / (s\lambda^2)$ .

103 For  $\delta \simeq 1.96$ ,  $2C(\delta) - 1 = 0.95$ . Our condition for an edge to be robust is therefore that

$$q_{g,a,i,j} \geq \left(\frac{1.96}{0.2}\right)^2 \cdot \frac{1}{s} \simeq \frac{96}{s}. \quad (11)$$

## 104 S4 Simulating disease trajectories

105 We can simulate patient disease trajectories as random walks on the multilayer network of disease clusters.  
 106 Assume we are given a patient of sex  $g$  and age group  $a$  and want to simulate their future disease trajectory  
 107 based on their present disease state. We first determine the layer of the multilayer network matching their sex  
 108 and age. Their present position in this layer is then determined as the cluster whose inclusion and exclusion  
 109 criteria match their disease history. Let the patient be in cluster  $k$  at present. We randomly choose the  
 110 position of the patient in the next year, such that with probability  $q_{g,a',k,j}$ , their next position is in cluster  
 111  $j$ , where  $a'$  is determined from the age of the patient in the next year. Repeating this procedure, we arrive  
 112 at a stochastically simulated long-term disease trajectory. Since during the simulation, the network layer  
 113 on which the patient is moving is updated according to their age progression, the model takes into account  
 114 effects of ageing. Fig. S8 (a) shows how the cohort patients distribute over the different clusters at the end of  
 115 the observation period. Simulating the further disease progression of the cohort patients after the end of the  
 116 observation period, we arrive at Fig. S8 (b), which shows the forecasted distribution of the cohort patients  
 117 over the clusters at the end of their lives. To assess the quality of the model, we compute several metrics  
 118 for comparing disease frequencies according to the simulated trajectories with the data, and compare these  
 119 metrics with those of two benchmark models, see section S5.

## 120 S5 Performance of the method and comparison with benchmarks

121 To quantify how well the cluster transitions shown in Fig. 6 of the main text characterize the progression  
 122 of actual multimorbid health states, we evaluate the performance of our method for simulating patient  
 123 trajectories in terms of several metrics and compare these metrics to two benchmark models that replace  
 124 DIVCLUS-T by a clustering scheme which assigns patients to clusters based on a single disease.

125 We denote for  $1 \leq d \leq N$  by  $p_d$  the probability that a randomly selected patient of the study cohort has  
 126 been assigned a diagnosis from the ICD-10 code block  $d$  until the end of the observation period. The total  
 127 disease burden of the study cohort at the end of the observation period is given by

$$N_{\text{obs}} = M \cdot \|\mathbf{p}\|_1, \quad (12)$$

128 where  $M = 5,112,811$  is the size of the cohort and  $\mathbf{p} = (p_1, \dots, p_N)$ . Here, for  $p \geq 1$ ,  $\|\cdot\|_p$  denotes the  $L^p$   
 129 norm, which, for a vector  $\mathbf{x} = (x_1, \dots, x_L)$ , is defined as

$$\|\mathbf{x}\|_p = \left( \sum_{\ell=1}^L x_\ell^p \right)^{\frac{1}{p}}. \quad (13)$$

130 Let  $\hat{p}_d$  be the marginal probability for a randomly selected patient to have been diagnosed with disease  $d$   
 131 until the end of the observation period according to our random walk model. The vector  $\hat{\mathbf{p}} = (\hat{p}_1, \dots, \hat{p}_N)$  is  
 132 computed as

$$\hat{\mathbf{p}} = \sum_{k=1}^K \hat{c}_k \mathbf{p}^{(k)}, \quad (14)$$

133 where  $\mathbf{p}^{(k)} = (p_k^{(1)}, \dots, p_k^{(N)})$ , with  $p_d^{(k)}$  for  $1 \leq d \leq N$  being the probability for a randomly selected patient  
 134 in cluster  $k$  to have disease  $d$ ;  $\hat{c}^{(k)}$  is the probability that a randomly selected patient of the cohort is assigned  
 135 to cluster  $k$  at the end of the observation period. The total disease burden of the study population according  
 136 to our model is

$$N_{\text{exp}} = M \cdot \|\hat{\mathbf{p}}\|_1. \quad (15)$$

137 The quantity  $\|\mathbf{w} \circ \hat{\mathbf{p}}\|_1 / \|\mathbf{w} \circ \mathbf{p}\|_1$ , where the entries of the vector  $\mathbf{w} = (w_1, w_2, \dots, w_N)$  are defined in Eq. (5),  
 138 serves us as a measure for how well our model reflects the observed total disease burden of our study  
 139 cohort at the end of the observation period. We also compute the quantities  $\|\Delta \mathbf{p}\|_1$  and  $\|\Delta \mathbf{p}\|_2$ , where  
 140  $\Delta \mathbf{p} = \mathbf{w} \circ (\mathbf{p} - \hat{\mathbf{p}})$ . Together with the mean cluster inertia  $f$ , these quantities measure the performance of  
 141 our algorithm in describing and predicting patient trajectories.

142 Benchmark method 1 consists in clustering the health states of patients according to their most recent  
 143 main diagnosis. For example, if a patient had one hospital stay with main diagnosis ‘Malignant neoplasms’  
 144 in 2008, then their health state at the end of that year is assigned to the cluster where all patients had  
 145 malignant neoplasms as their most recent main diagnosis. If a patient received more than one main diagnosis  
 146 in a given year, then their health state at the end of this year is assigned to the cluster of patients with the  
 147 less frequent main diagnosis. An additional cluster contains all patients who have not had any diagnoses yet.

148 Benchmark method 2 consists in clustering patients according to the rarest disease they have been diag-  
 149 nosed with so far. For example, if a patient has been diagnosed with diagnoses from the block ‘Hypertensive  
 150 diseases’ and ‘Ischaemic heart diseases’, then they are assigned to the cluster of patients who have ‘Ischaemic  
 151 heart diseases’ as their rarest disease, because diagnoses of this block are rarer than ‘Hypertensive diseases’  
 152 diagnoses. As for Benchmark method 1, an additional cluster contains all patients who have not had any  
 153 diagnoses yet.

154 The quantities defined above are compared in table S135. While both with DIVCLUS-T and Benchmark  
 155 method 2 we attain a mean cluster inertia of 0.48, DIVCLUS-T clearly outperforms both benchmark methods  
 156 in terms of the ability to model future disease burdens, as quantified by the other metrics. Benchmark method  
 157 1 performs worse than DIVCLUS-T in all metrics.

## 158 S6 Figures

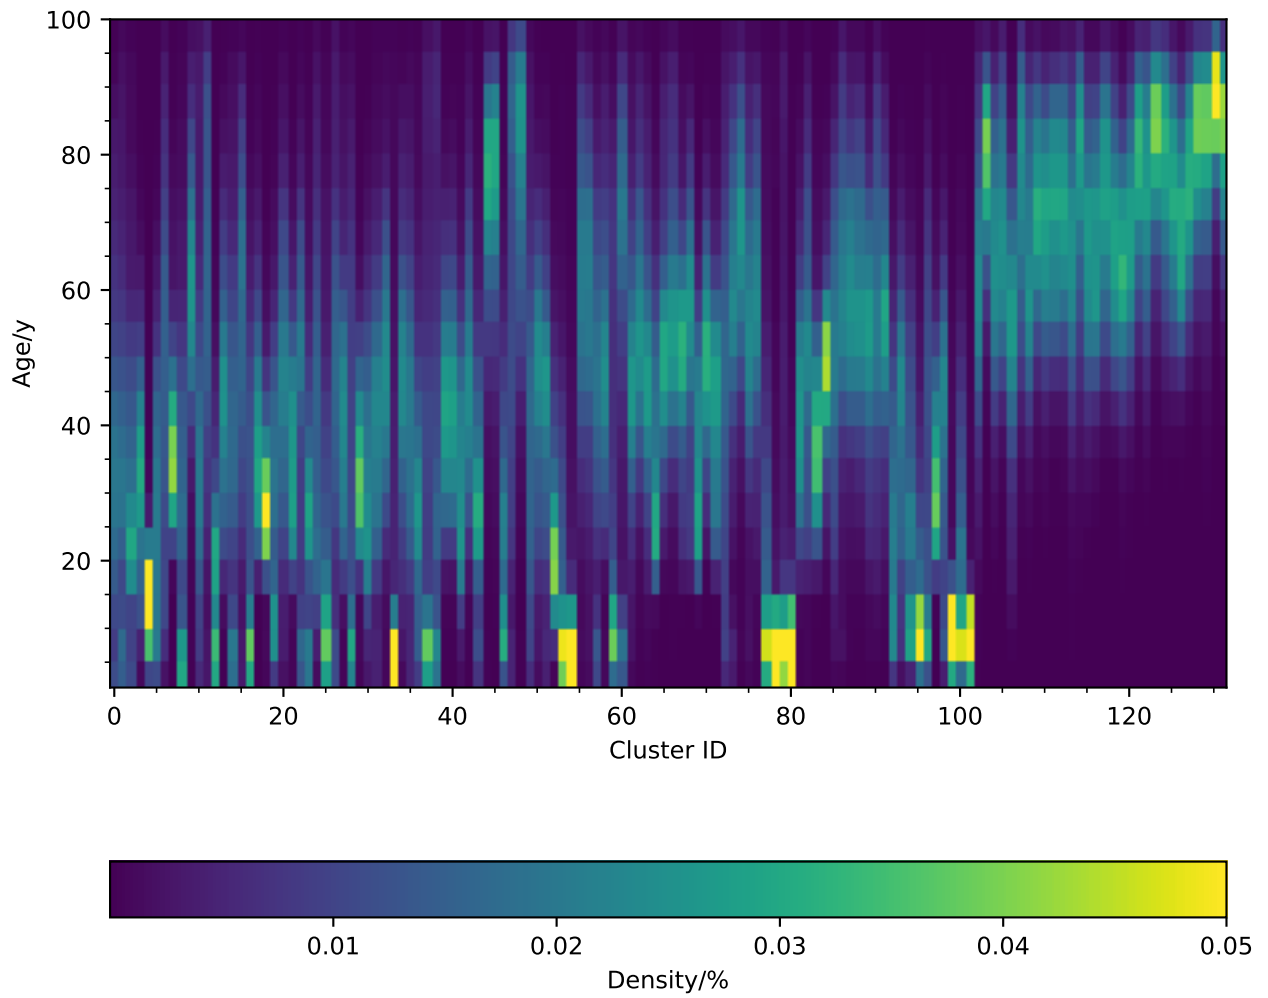

Figure S1: Two-dimensional histogram of the age distribution of patients in the different clusters.

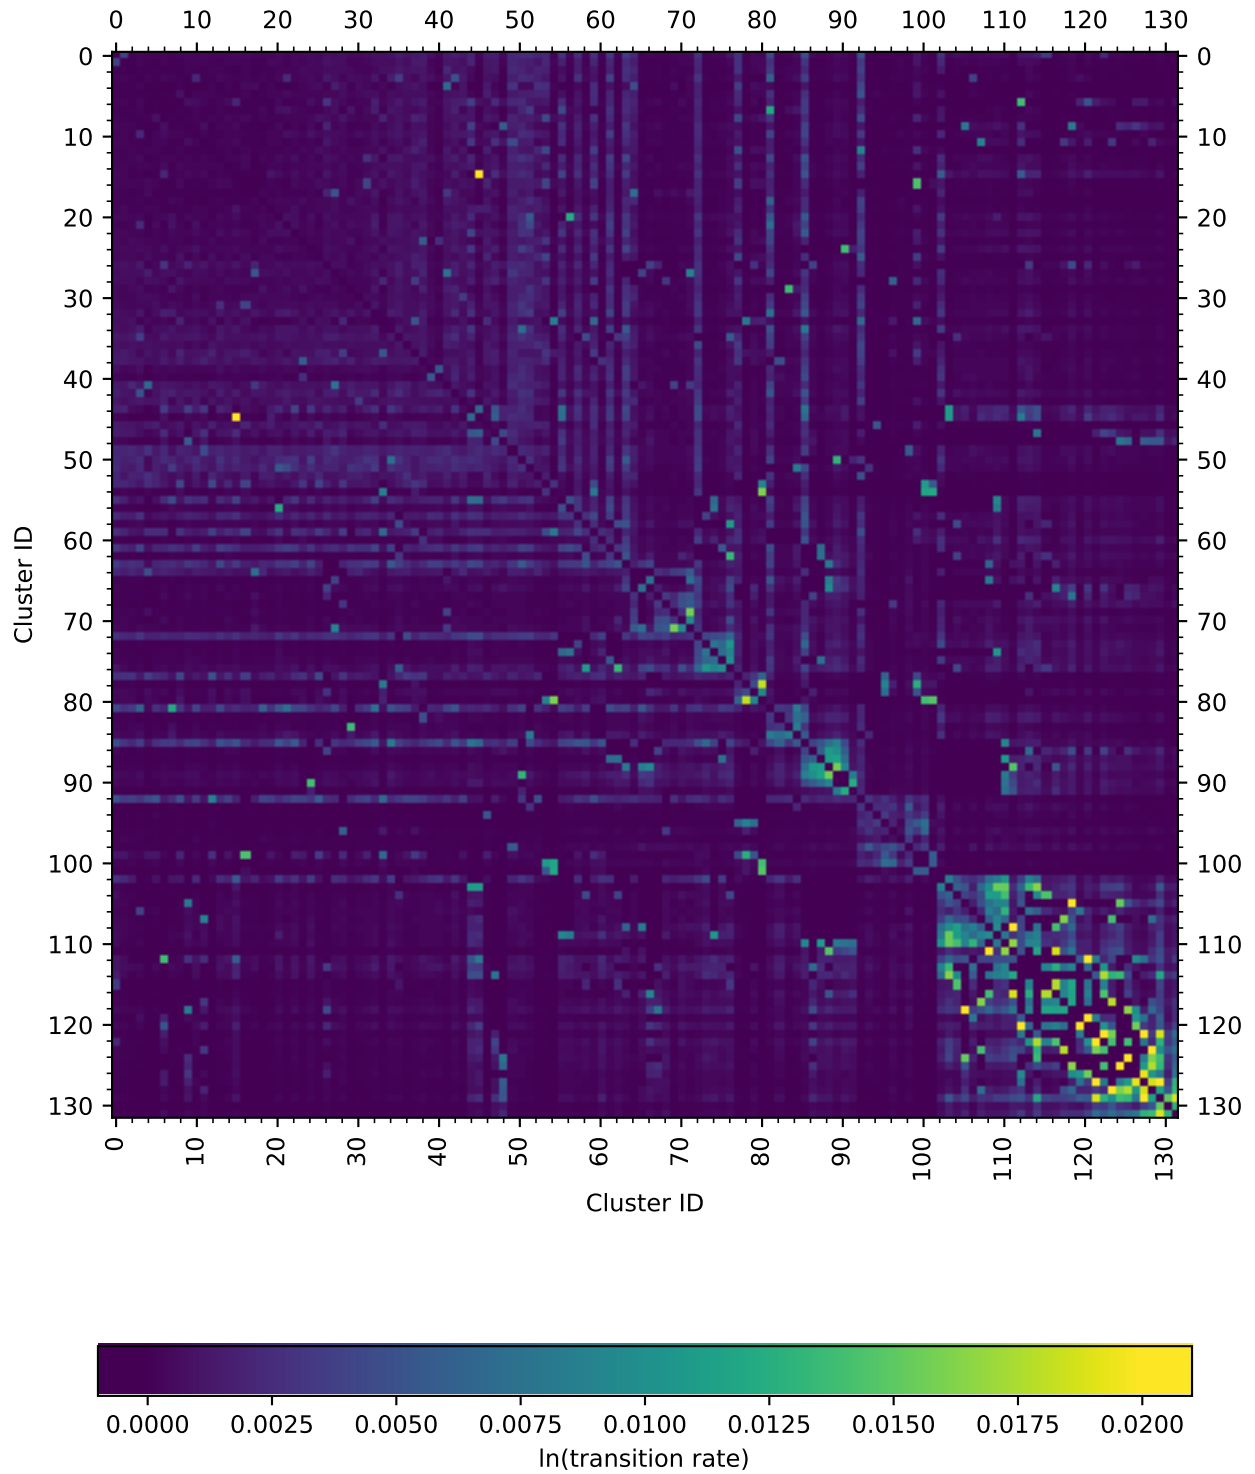

Figure S2: Visualisation of the transition rates between each pair of clusters. The image consists of  $132 \times 132$  pixels, each representing one pair of clusters. The pixel in the  $j$ th row and  $k$ th column is coloured according to the rate at which patients transition between cluster  $j$  and cluster  $k$ . For better visibility, the pixels on the diagonal from the upper left to the lower right corner of the image, which represent self-loops, have been shaded dark.

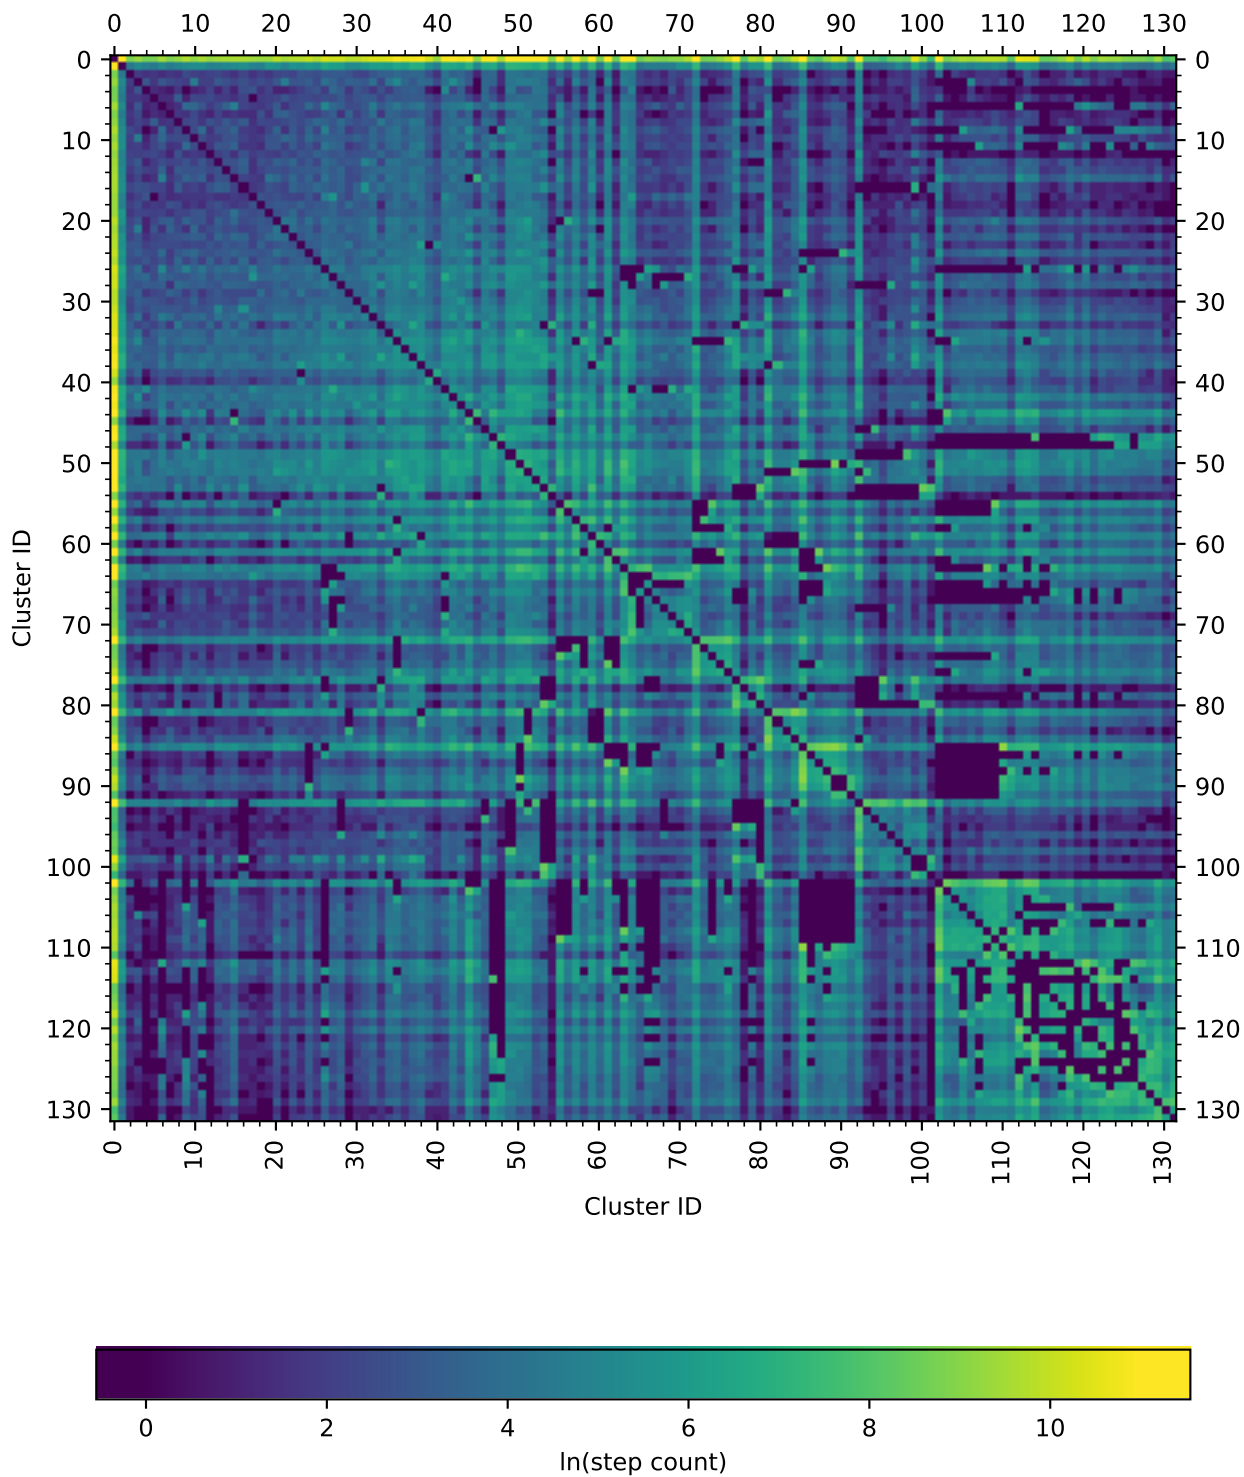

Figure S3: Visualisation of the number of patients transitioning between each pair of clusters. The image consists of  $132 \times 132$  pixels, each representing one pair of clusters. The pixel in the  $j$ th row and  $k$ th column is coloured according to the number of patients who step from cluster  $j$  to cluster  $k$  or from cluster  $k$  to cluster  $j$ . For better visibility, the pixels on the diagonal from the upper left to the lower right corner of the image, which represent self-loops, have been shaded dark.



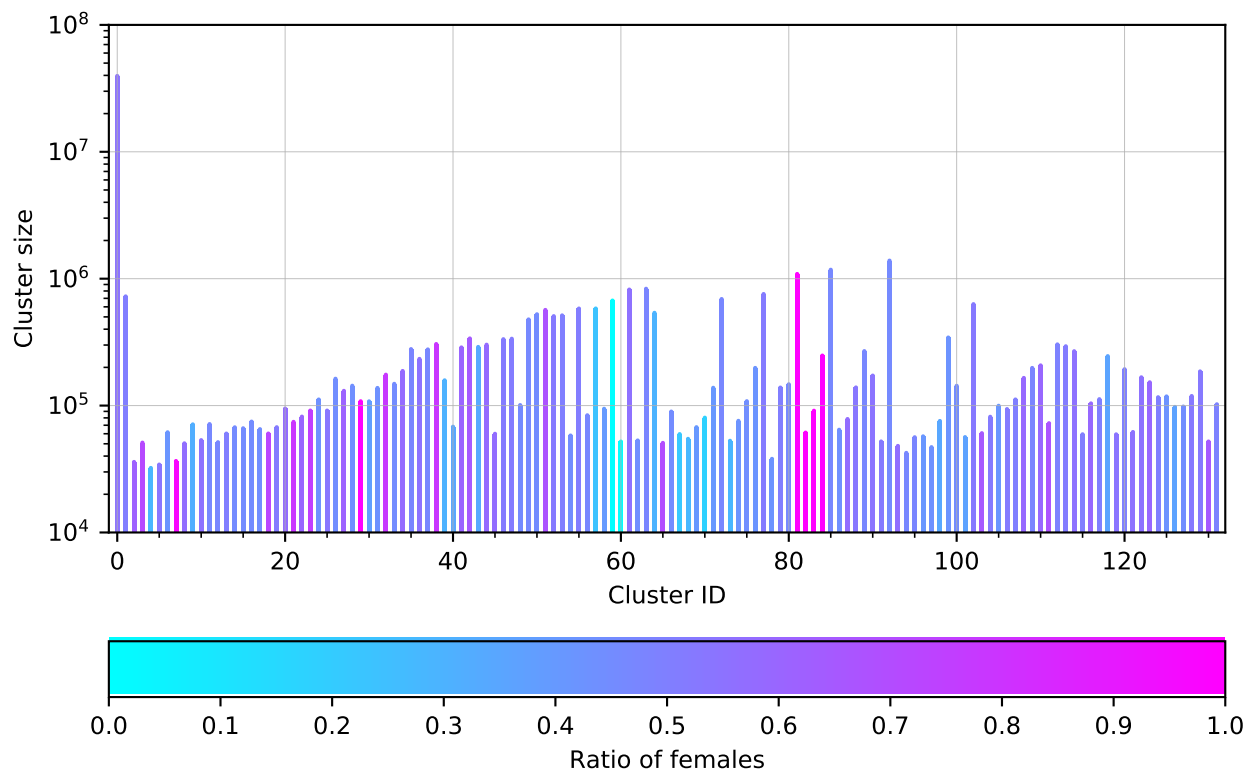

Figure S4: Number of observations assigned to the different clusters. The bars are color coded according to the ratio of females within the corresponding cluster.

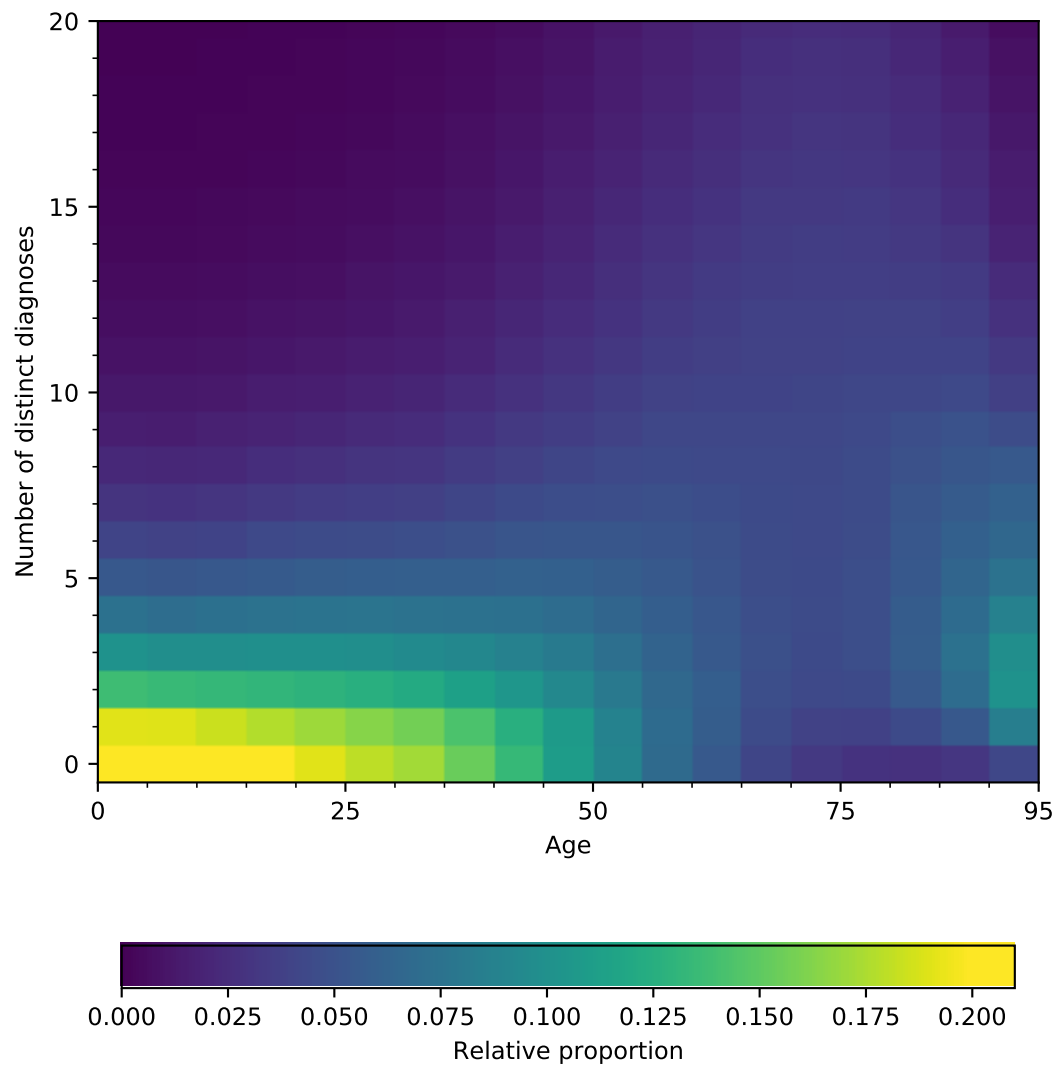

Figure S5: Two-dimensional histogram of the number of distinct diagnoses acquired by patients of the study cohort in the observation period from 2003 to 2014, depending on the 5-year age group they belong to in 2014. The data is normalized such that values sum to one separately for each age group.

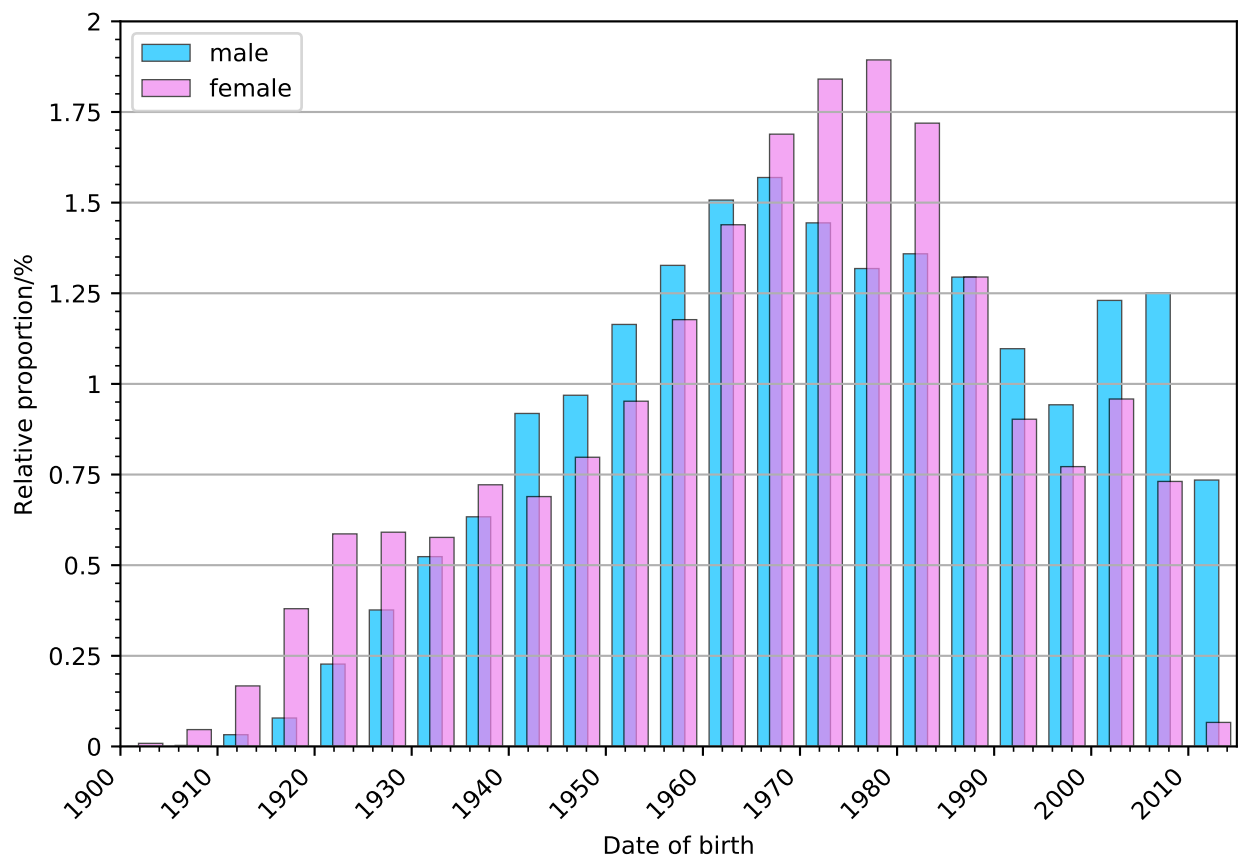

Figure S6: Distribution of the dates of birth of patients in the study cohort. The data is normalized such that the bar heights for males and females sum to one separately.

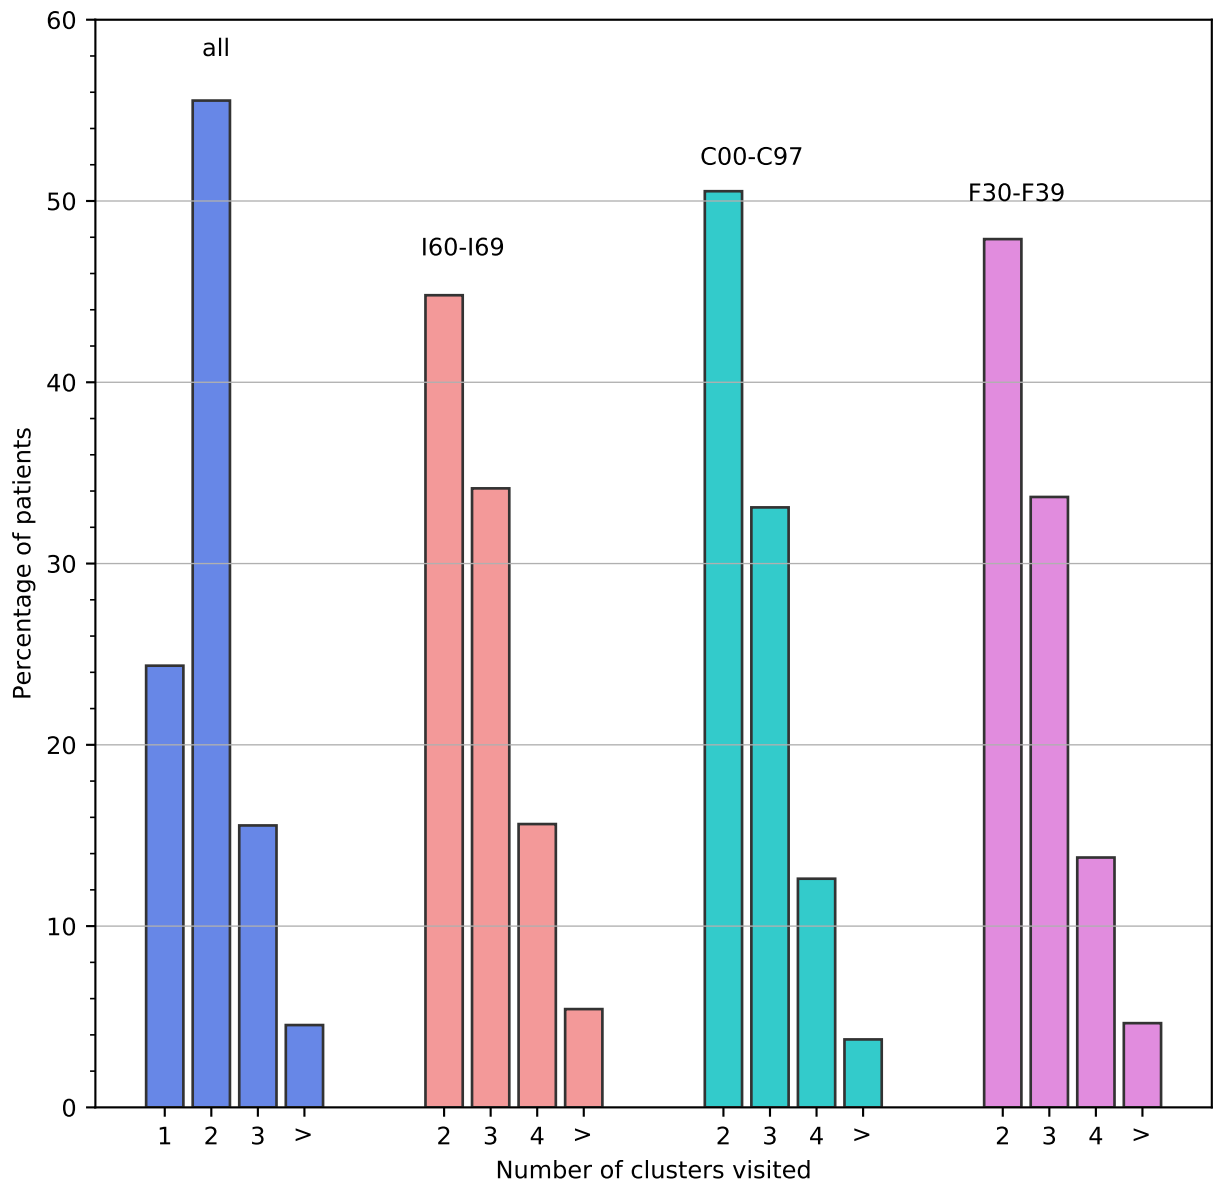

Figure S7: Relative distribution of the number of clusters visited during the observation period for all people in the cohort (blue), patients diagnosed with cerebrovascular diseases (red, I60–I69), malignant neoplasms (green, C00–C97) and mood [affective] disorders (magenta, F30–F39) during the observation period. Note the different labelling of the horizontal axis in the leftmost histogram.

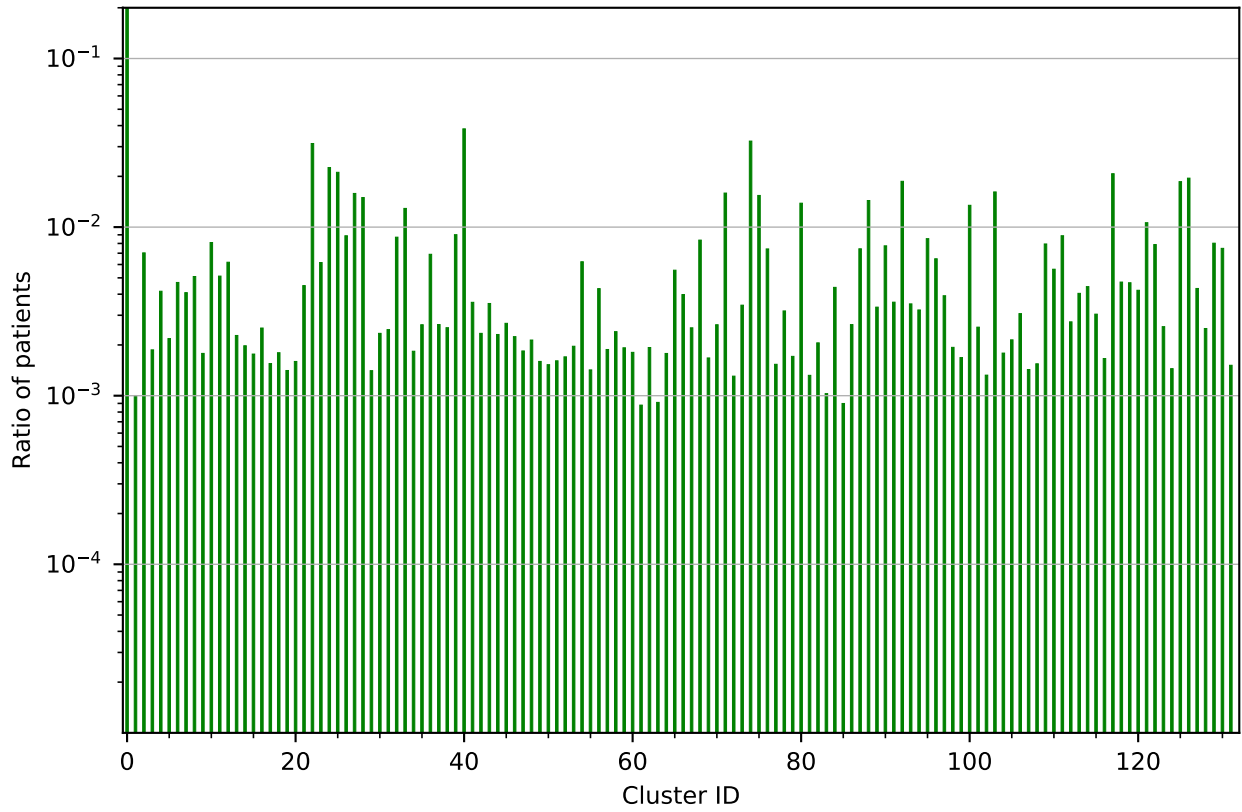

(a)

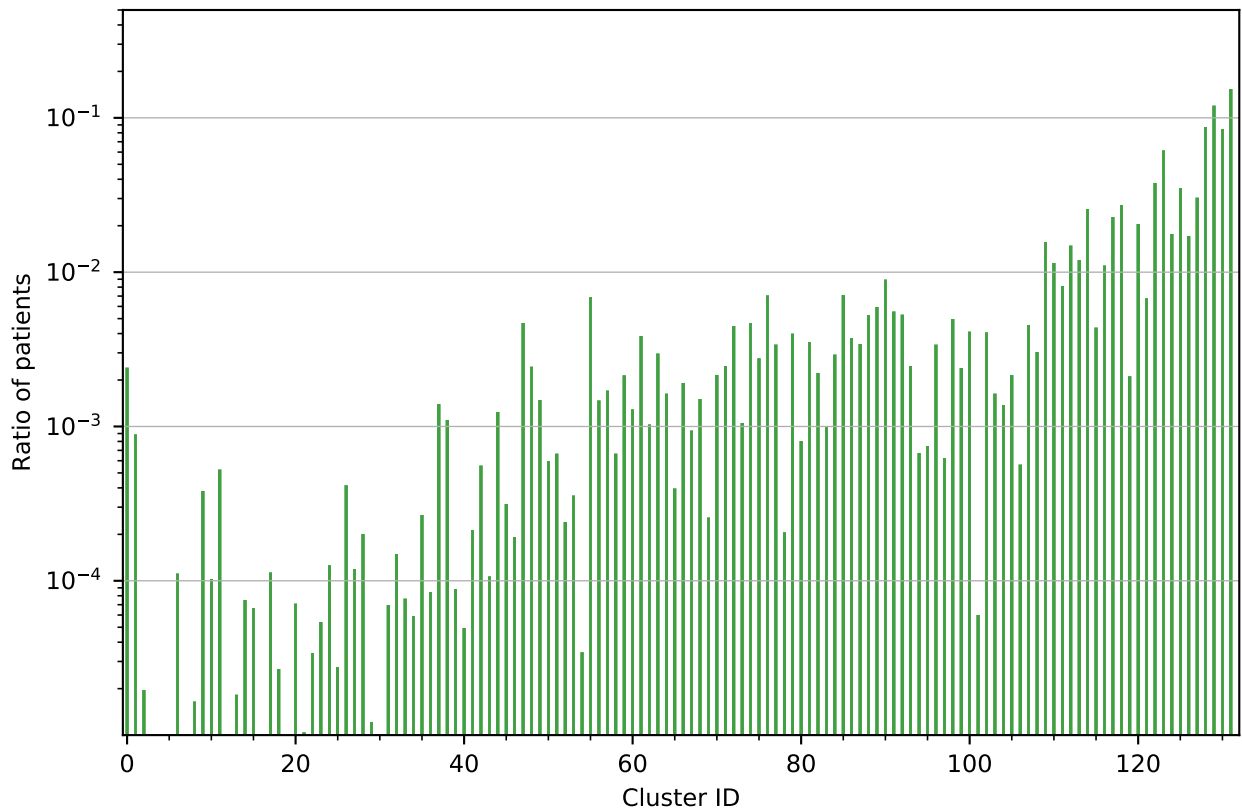

(b)

Figure S8: Distribution of clusters occupied by patients at the end of the observation period (a). Distribution of clusters occupied by patients at the end of their lives, as forecasted by our multiplex network model of disease trajectories (b).

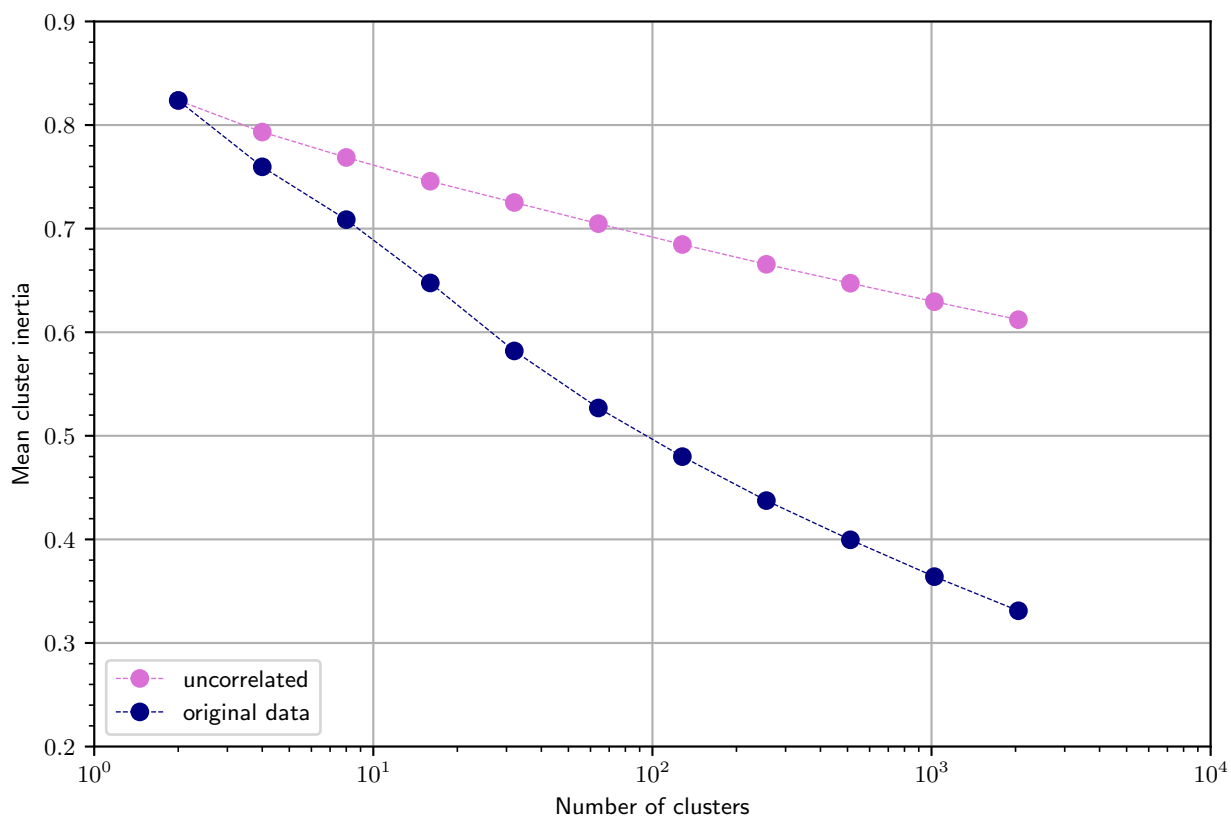

Figure S9: Mean cluster inertia as a function of the number of clusters for original and uncorrelated data.

159 **S7 Tables**

160 The following table lists all the diagnosis blocks considered in this work.

161

162

| ID | ICD-10  | Description                                                                                  |
|----|---------|----------------------------------------------------------------------------------------------|
| 0  | A00-A09 | Intestinal infectious diseases                                                               |
| 1  | A15-A19 | Tuberculosis                                                                                 |
| 2  | A20-A28 | Certain zoonotic bacterial diseases                                                          |
| 3  | A30-A49 | Other bacterial diseases                                                                     |
| 4  | A50-A64 | Infections with a predominantly sexual mode of transmission                                  |
| 5  | A65-A69 | Other spirochaetal diseases                                                                  |
| 6  | A70-A74 | Other diseases caused by chlamydiae                                                          |
| 7  | A75-A79 | Rickettsioses                                                                                |
| 8  | A80-A91 | Viral infections of the central nervous system                                               |
| 9  | A92-A99 | Arthropod-borne viral fevers and viral haemorrhagic fevers                                   |
| 10 | B00-B09 | Viral infections characterized by skin and mucous membrane lesions                           |
| 11 | B15-B19 | Viral hepatitis                                                                              |
| 12 | B20-B24 | Human immunodeficiency virus [HIV] disease                                                   |
| 13 | B25-B34 | Other viral diseases                                                                         |
| 14 | B35-B49 | Mycoses                                                                                      |
| 15 | B50-B64 | Protozoal diseases                                                                           |
| 16 | B65-B83 | Helminthiasis                                                                                |
| 17 | B85-B89 | Pediculosis, acariasis and other infestations                                                |
| 18 | B90-B94 | Sequelae of infectious and parasitic diseases                                                |
| 19 | B95-B97 | Bacterial, viral and other infectious agents                                                 |
| 20 | B99-B99 | Other infectious diseases                                                                    |
| 21 | C00-C97 | Malignant neoplasms                                                                          |
| 22 | D00-D09 | In situ neoplasms                                                                            |
| 23 | D10-D36 | Benign neoplasms                                                                             |
| 24 | D37-D48 | Neoplasms of uncertain or unknown behaviour                                                  |
| 25 | D50-D53 | Nutritional anaemias                                                                         |
| 26 | D55-D59 | Haemolytic anaemias                                                                          |
| 27 | D60-D64 | Aplastic and other anaemias                                                                  |
| 28 | D65-D69 | Coagulation defects, purpura and other haemorrhagic conditions                               |
| 29 | D70-D77 | Other diseases of blood and blood-forming organs                                             |
| 30 | D80-D89 | Certain disorders involving the immune mechanism                                             |
| 31 | E00-E07 | Disorders of thyroid gland                                                                   |
| 32 | E10-E14 | Diabetes mellitus                                                                            |
| 33 | E15-E16 | Other disorders of glucose regulation and pancreatic internal secretion                      |
| 34 | E20-E35 | Disorders of other endocrine glands                                                          |
| 35 | E40-E46 | Malnutrition                                                                                 |
| 36 | E50-E64 | Other nutritional deficiencies                                                               |
| 37 | E65-E68 | Obesity and other hyperalimentation                                                          |
| 38 | E70-E90 | Metabolic disorders                                                                          |
| 39 | F00-F09 | Organic, including symptomatic, mental disorders                                             |
| 40 | F10-F19 | Mental and behavioral disorders due to psychoactive substance use                            |
| 41 | F20-F29 | Schizophrenia, schizotypal and delusional disorders                                          |
| 42 | F30-F39 | Mood [affective] disorders                                                                   |
| 43 | F40-F48 | Neurotic, stress-related and somatoform disorders                                            |
| 44 | F50-F59 | Behavioral syndromes associated with physiological disturbances and physical factors         |
| 45 | F60-F69 | Disorders of adult personality and behaviour                                                 |
| 46 | F70-F79 | Mental retardation                                                                           |
| 47 | F80-F89 | Disorders of psychological development                                                       |
| 48 | F90-F98 | Behavioral and emotional disorders with onset usually occurring in childhood and adolescence |
| 49 | F99-F99 | Unspecified mental disorder                                                                  |
| 50 | G00-G09 | Inflammatory diseases of the central nervous system                                          |
| 51 | G10-G13 | Systemic atrophies primarily affecting the central nervous system                            |
| 52 | G20-G26 | Extrapyramidal and movement disorders                                                        |
| 53 | G30-G32 | Other degenerative diseases of the nervous system                                            |
| 54 | G35-G37 | Demyelinating diseases of the central nervous system                                         |
| 55 | G40-G47 | Episodic and paroxysmal disorders                                                            |
| 56 | G50-G59 | Nerve, nerve root and plexus disorders                                                       |
| 57 | G60-G64 | Polynuropathies and other disorders of the peripheral nervous system                         |
| 58 | G70-G73 | Diseases of myoneural junction and muscle                                                    |
| 59 | G80-G83 | Cerebral palsy and other paralytic syndromes                                                 |
| 60 | G90-G99 | Other disorders of the nervous system                                                        |

| ID  | ICD-10  | Description                                                                    |
|-----|---------|--------------------------------------------------------------------------------|
| 61  | H00-H06 | Disorders of eyelid, lacrimal system and orbit                                 |
| 62  | H10-H13 | Disorders of conjunctiva                                                       |
| 63  | H15-H22 | Disorders of sclera, cornea, iris and ciliary body                             |
| 64  | H25-H28 | Disorders of lens                                                              |
| 65  | H30-H36 | Disorders of choroid and retina                                                |
| 66  | H40-H42 | Glaucoma                                                                       |
| 67  | H43-H45 | Disorders of vitreous body and globe                                           |
| 68  | H46-H48 | Disorders of optic nerve and visual pathways                                   |
| 69  | H49-H52 | Disorders of ocular muscles, binocular movement, accommodation and refraction  |
| 70  | H53-H54 | Visual disturbances and blindness                                              |
| 71  | H55-H59 | Other disorders of eye and adnexa                                              |
| 72  | H60-H62 | Diseases of external ear                                                       |
| 73  | H65-H75 | Diseases of middle ear and mastoid                                             |
| 74  | H80-H83 | Diseases of inner ear                                                          |
| 75  | H90-H95 | Other disorders of ear                                                         |
| 76  | I00-I02 | Acute rheumatic fever                                                          |
| 77  | I05-I09 | Chronic rheumatic heart diseases                                               |
| 78  | I10-I15 | Hypertensive diseases                                                          |
| 79  | I20-I25 | Ischaemic heart diseases                                                       |
| 80  | I26-I28 | Pulmonary heart disease and diseases of pulmonary circulation                  |
| 81  | I30-I52 | Other forms of heart disease                                                   |
| 82  | I60-I69 | Cerebrovascular diseases                                                       |
| 83  | I70-I79 | Diseases of arteries, arterioles and capillaries                               |
| 84  | I80-I89 | Diseases of veins, lymphatic vessels and lymph nodes, not elsewhere classified |
| 85  | I95-I99 | Other and unspecified disorders of the circulatory system                      |
| 86  | J00-J06 | Acute upper respiratory infections                                             |
| 87  | J09-J18 | Influenza and pneumonia                                                        |
| 88  | J20-J22 | Other acute lower respiratory infections                                       |
| 89  | J30-J39 | Other diseases of upper respiratory tract                                      |
| 90  | J40-J47 | Chronic lower respiratory diseases                                             |
| 91  | J60-J70 | Lung diseases due to external agents                                           |
| 92  | J80-J84 | Other respiratory diseases principally affecting the interstitium              |
| 93  | J85-J86 | Suppurative and necrotic conditions of lower respiratory tract                 |
| 94  | J90-J94 | Other diseases of pleura                                                       |
| 95  | J95-J99 | Other diseases of the respiratory system                                       |
| 96  | K00-K14 | Diseases of oral cavity, salivary glands and jaws                              |
| 97  | K20-K31 | Diseases of oesophagus, stomach and duodenum                                   |
| 98  | K35-K38 | Diseases of appendix                                                           |
| 99  | K40-K46 | Hernia                                                                         |
| 100 | K50-K52 | Noninfective enteritis and colitis                                             |
| 101 | K55-K63 | Other diseases of intestines                                                   |
| 102 | K65-K67 | Diseases of peritoneum                                                         |
| 103 | K70-K77 | Diseases of liver                                                              |
| 104 | K80-K87 | Disorders of gallbladder, biliary tract and pancreas                           |
| 105 | K90-K93 | Other diseases of the digestive system                                         |
| 106 | L00-L08 | Infections of the skin and subcutaneous tissue                                 |
| 107 | L10-L14 | Bullous disorders                                                              |
| 108 | L20-L30 | Dermatitis and eczema                                                          |
| 109 | L40-L45 | Papulosquamous disorders                                                       |
| 110 | L50-L54 | Urticaria and erythema                                                         |
| 111 | L55-L59 | Radiation-related disorders of the skin and subcutaneous tissue                |
| 112 | L60-L75 | Disorders of skin appendages                                                   |
| 113 | L80-L99 | Other disorders of the skin and subcutaneous tissue                            |
| 114 | M00-M25 | Arthropathies                                                                  |
| 115 | M30-M36 | Systemic connective tissue disorders                                           |
| 116 | M40-M54 | Dorsopathies                                                                   |
| 117 | M60-M79 | Soft tissue disorders                                                          |
| 118 | M80-M94 | Osteopathies and chondropathies                                                |
| 119 | M95-M99 | Other disorders of the musculoskeletal system and connective tissue            |
| 120 | N00-N08 | Glomerular diseases                                                            |
| 121 | N10-N16 | Renal tubulo-interstitial diseases                                             |
| 122 | N17-N19 | Renal failure                                                                  |
| 123 | N20-N23 | Urolithiasis                                                                   |
| 124 | N25-N29 | Other disorders of kidney and ureter                                           |
| 125 | N30-N39 | Other diseases of urinary system                                               |
| 126 | N40-N51 | Diseases of male genital organs                                                |
| 127 | N60-N64 | Disorders of breast                                                            |
| 128 | N70-N77 | Inflammatory diseases of female pelvic organs                                  |
| 129 | N80-N98 | Noninflammatory disorders of female genital tract                              |
| 130 | N99-N99 | Other disorders of the genitourinary system                                    |



|                                                                                                         |   |
|---------------------------------------------------------------------------------------------------------|---|
| Intestinal infectious diseases (A00-A09)                                                                | X |
| Other bacterial diseases (A30-A49)                                                                      | X |
| Infections with a predominantly sexual mode of transmission (A50-A64)                                   | X |
| Viral infections characterized by skin and mucous membrane lesions (B00-B09)                            | X |
| Other viral diseases (B25-B34)                                                                          | X |
| Malignant neoplasms (C00-C97)                                                                           | X |
| In situ neoplasms (D00-D09)                                                                             | X |
| Benign neoplasms (D10-D36)                                                                              | X |
| Neoplasms of uncertain or unknown behaviour (D37-D48)                                                   | X |
| Disorders of thyroid gland (E00-E07)                                                                    | X |
| Diabetes mellitus (E10-E14)                                                                             | X |
| Obesity and other hyperalimentation (E65-E68)                                                           | X |
| Metabolic disorders (E70-E90)                                                                           | X |
| Mental and behavioural disorders due to psychoactive substance use (F10-F19)                            | X |
| Schizophrenia, schizotypal and delusional disorders (F20-F29)                                           | X |
| Mood [affective] disorders (F30-F39)                                                                    | X |
| Neurotic, stress-related and somatoform disorders (F40-F48)                                             | X |
| Behavioural and emotional disorders with onset usually occurring in childhood and adolescence (F90-F98) | X |
| Episodic and paroxysmal disorders (G40-G47)                                                             | X |
| Nerve, nerve root and plexus disorders (G50-G59)                                                        | X |
| Disorders of eyelid, lacrimal system and orbit (H00-H06)                                                | X |
| Disorders of lens (H25-H28)                                                                             | X |
| Disorders of choroid and retina (H30-H36)                                                               | X |
| Disorders of ocular muscles, binocular movement, accommodation and refraction (H49-H52)                 | X |
| Diseases of middle ear and mastoid (H65-H75)                                                            | X |
| Diseases of inner ear (H80-H83)                                                                         | X |
| Other disorders of ear (H90-H95)                                                                        | X |
| Hypertensive diseases (I10-I15)                                                                         | X |
| Ischaemic heart diseases (I20-I25)                                                                      | X |
| Other forms of heart disease (I30-I52)                                                                  | X |
| Cerebrovascular diseases (I60-I69)                                                                      | X |
| Diseases of veins, lymphatic vessels and lymph nodes, not elsewhere classified (I80-I89)                | X |
| Other and unspecified disorders of the circulatory system (I95-I99)                                     | X |
| Acute upper respiratory infections (J00-J06)                                                            | X |
| Influenza and pneumonia (J09-J18)                                                                       | X |
| Other acute lower respiratory infections (J20-J22)                                                      | X |
| Other diseases of upper respiratory tract (J30-J39)                                                     | X |
| Chronic lower respiratory diseases (J40-J47)                                                            | X |
| Diseases of oral cavity, salivary glands and jaws (K00-K14)                                             | X |
| Diseases of oesophagus, stomach and duodenum (K20-K31)                                                  | X |
| Diseases of appendix (K35-K38)                                                                          | X |
| Hernia (K40-K46)                                                                                        | X |
| Noninfective enteritis and colitis (K50-K52)                                                            | X |
| Other diseases of intestines (K55-K63)                                                                  | X |
| Disorders of gallbladder, biliary tract and pancreas (K80-K87)                                          | X |
| Infections of the skin and subcutaneous tissue (L00-L08)                                                | X |
| Dermatitis and eczema (L20-L30)                                                                         | X |
| Urticaria and erythema (L50-L54)                                                                        | X |
| Disorders of skin appendages (L60-L75)                                                                  | X |
| Other disorders of the skin and subcutaneous tissue (L80-L99)                                           | X |
| Arthropathies (M00-M25)                                                                                 | X |
| Dorsopathies (M40-M54)                                                                                  | X |
| Soft tissue disorders (M60-M79)                                                                         | X |
| Osteopathies and chondropathies (M80-M94)                                                               | X |
| Renal tubulo-interstitial diseases (N10-N16)                                                            | X |
| Urolithiasis (N20-N23)                                                                                  | X |
| Other diseases of urinary system (N30-N39)                                                              | X |
| Diseases of male genital organs (N40-N51)                                                               | X |
| Disorders of breast (N60-N64)                                                                           | X |
| Inflammatory diseases of female pelvic organs (N70-N77)                                                 | X |
| Noninflammatory disorders of female genital tract (N80-N98)                                             | X |

166

167

Table S2: Inclusion and exclusion criteria for cluster 1. Female ratio: 50%, mean age of patients: 35, mortality: 0%.

|                                                                                                         |   |
|---------------------------------------------------------------------------------------------------------|---|
| Intestinal infectious diseases (A00-A09)                                                                | X |
| Other bacterial diseases (A30-A49)                                                                      | X |
| Infections with a predominantly sexual mode of transmission (A50-A64)                                   | X |
| Viral infections characterized by skin and mucous membrane lesions (B00-B09)                            | X |
| Other viral diseases (B25-B34)                                                                          | X |
| Malignant neoplasms (C00-C97)                                                                           | X |
| In situ neoplasms (D00-D09)                                                                             | X |
| Benign neoplasms (D10-D36)                                                                              | X |
| Neoplasms of uncertain or unknown behaviour (D37-D48)                                                   | X |
| Disorders of thyroid gland (E00-E07)                                                                    | X |
| Diabetes mellitus (E10-E14)                                                                             | X |
| Obesity and other hyperalimentation (E65-E68)                                                           | X |
| Metabolic disorders (E70-E90)                                                                           | X |
| Mental and behavioural disorders due to psychoactive substance use (F10-F19)                            | X |
| Schizophrenia, schizotypal and delusional disorders (F20-F29)                                           | X |
| Mood [affective] disorders (F30-F39)                                                                    | X |
| Neurotic, stress-related and somatoform disorders (F40-F48)                                             | X |
| Behavioural and emotional disorders with onset usually occurring in childhood and adolescence (F90-F98) | X |
| Episodic and paroxysmal disorders (G40-G47)                                                             | X |
| Nerve, nerve root and plexus disorders (G50-G59)                                                        | X |
| Disorders of eyelid, lacrimal system and orbit (H00-H06)                                                | X |
| Disorders of lens (H25-H28)                                                                             | X |
| Disorders of choroid and retina (H30-H36)                                                               | X |
| Disorders of ocular muscles, binocular movement, accommodation and refraction (H49-H52)                 | X |
| Diseases of middle ear and mastoid (H65-H75)                                                            | X |
| Diseases of inner ear (H80-H83)                                                                         | X |
| Other disorders of ear (H90-H95)                                                                        | X |
| Hypertensive diseases (I10-I15)                                                                         | X |
| Ischaemic heart diseases (I20-I25)                                                                      | X |
| Other forms of heart disease (I30-I52)                                                                  | X |
| Cerebrovascular diseases (I60-I69)                                                                      | X |
| Diseases of veins, lymphatic vessels and lymph nodes, not elsewhere classified (I80-I89)                | X |
| Other and unspecified disorders of the circulatory system (I95-I99)                                     | ✓ |
| Acute upper respiratory infections (J00-J06)                                                            | X |
| Influenza and pneumonia (J09-J18)                                                                       | X |
| Other acute lower respiratory infections (J20-J22)                                                      | X |
| Other diseases of upper respiratory tract (J30-J39)                                                     | X |
| Chronic lower respiratory diseases (J40-J47)                                                            | X |
| Diseases of oral cavity, salivary glands and jaws (K00-K14)                                             | X |
| Diseases of oesophagus, stomach and duodenum (K20-K31)                                                  | X |
| Diseases of appendix (K35-K38)                                                                          | X |
| Hernia (K40-K46)                                                                                        | X |
| Noninfective enteritis and colitis (K50-K52)                                                            | X |
| Other diseases of intestines (K55-K63)                                                                  | X |
| Disorders of gallbladder, biliary tract and pancreas (K80-K87)                                          | X |
| Infections of the skin and subcutaneous tissue (L00-L08)                                                | X |
| Dermatitis and eczema (L20-L30)                                                                         | X |
| Urticaria and erythema (L50-L54)                                                                        | X |
| Disorders of skin appendages (L60-L75)                                                                  | X |
| Other disorders of the skin and subcutaneous tissue (L80-L99)                                           | X |
| Arthropathies (M00-M25)                                                                                 | X |
| Dorsopathies (M40-M54)                                                                                  | X |
| Soft tissue disorders (M60-M79)                                                                         | X |
| Osteopathies and chondropathies (M80-M94)                                                               | X |
| Renal tubulo-interstitial diseases (N10-N16)                                                            | X |
| Urolithiasis (N20-N23)                                                                                  | X |
| Other diseases of urinary system (N30-N39)                                                              | X |
| Diseases of male genital organs (N40-N51)                                                               | X |
| Disorders of breast (N60-N64)                                                                           | X |
| Inflammatory diseases of female pelvic organs (N70-N77)                                                 | X |
| Noninflammatory disorders of female genital tract (N80-N98)                                             | X |

168

169

Table S3: Inclusion and exclusion criteria for cluster 2. Female ratio: 62%, mean age of patients: 31, mortality: 1%.

|                                                                                                         |   |
|---------------------------------------------------------------------------------------------------------|---|
| Intestinal infectious diseases (A00-A09)                                                                | X |
| Other bacterial diseases (A30-A49)                                                                      | X |
| Infections with a predominantly sexual mode of transmission (A50-A64)                                   | X |
| Viral infections characterized by skin and mucous membrane lesions (B00-B09)                            | X |
| Other viral diseases (B25-B34)                                                                          | X |
| Malignant neoplasms (C00-C97)                                                                           | X |
| In situ neoplasms (D00-D09)                                                                             | X |
| Benign neoplasms (D10-D36)                                                                              | X |
| Neoplasms of uncertain or unknown behaviour (D37-D48)                                                   | X |
| Disorders of thyroid gland (E00-E07)                                                                    | X |
| Diabetes mellitus (E10-E14)                                                                             | X |
| Obesity and other hyperalimentation (E65-E68)                                                           | ✓ |
| Metabolic disorders (E70-E90)                                                                           | X |
| Mental and behavioural disorders due to psychoactive substance use (F10-F19)                            | X |
| Schizophrenia, schizotypal and delusional disorders (F20-F29)                                           | X |
| Mood [affective] disorders (F30-F39)                                                                    | X |
| Neurotic, stress-related and somatoform disorders (F40-F48)                                             | X |
| Behavioural and emotional disorders with onset usually occurring in childhood and adolescence (F90-F98) | X |
| Episodic and paroxysmal disorders (G40-G47)                                                             | X |
| Nerve, nerve root and plexus disorders (G50-G59)                                                        | X |
| Disorders of eyelid, lacrimal system and orbit (H00-H06)                                                | X |
| Disorders of lens (H25-H28)                                                                             | X |
| Disorders of choroid and retina (H30-H36)                                                               | X |
| Disorders of ocular muscles, binocular movement, accommodation and refraction (H49-H52)                 | X |
| Diseases of middle ear and mastoid (H65-H75)                                                            | X |
| Diseases of inner ear (H80-H83)                                                                         | X |
| Other disorders of ear (H90-H95)                                                                        | X |
| Hypertensive diseases (I10-I15)                                                                         | X |
| Ischaemic heart diseases (I20-I25)                                                                      | X |
| Other forms of heart disease (I30-I52)                                                                  | X |
| Cerebrovascular diseases (I60-I69)                                                                      | X |
| Diseases of veins, lymphatic vessels and lymph nodes, not elsewhere classified (I80-I89)                | X |
| Acute upper respiratory infections (J00-J06)                                                            | X |
| Influenza and pneumonia (J09-J18)                                                                       | X |
| Other acute lower respiratory infections (J20-J22)                                                      | X |
| Other diseases of upper respiratory tract (J30-J39)                                                     | X |
| Chronic lower respiratory diseases (J40-J47)                                                            | X |
| Diseases of oral cavity, salivary glands and jaws (K00-K14)                                             | X |
| Diseases of oesophagus, stomach and duodenum (K20-K31)                                                  | X |
| Diseases of appendix (K35-K38)                                                                          | X |
| Hernia (K40-K46)                                                                                        | X |
| Noninfective enteritis and colitis (K50-K52)                                                            | X |
| Other diseases of intestines (K55-K63)                                                                  | X |
| Disorders of gallbladder, biliary tract and pancreas (K80-K87)                                          | X |
| Infections of the skin and subcutaneous tissue (L00-L08)                                                | X |
| Dermatitis and eczema (L20-L30)                                                                         | X |
| Urticaria and erythema (L50-L54)                                                                        | X |
| Disorders of skin appendages (L60-L75)                                                                  | X |
| Other disorders of the skin and subcutaneous tissue (L80-L99)                                           | X |
| Arthropathies (M00-M25)                                                                                 | X |
| Dorsopathies (M40-M54)                                                                                  | X |
| Soft tissue disorders (M60-M79)                                                                         | X |
| Osteopathies and chondropathies (M80-M94)                                                               | X |
| Renal tubulo-interstitial diseases (N10-N16)                                                            | X |
| Urolithiasis (N20-N23)                                                                                  | X |
| Other diseases of urinary system (N30-N39)                                                              | X |
| Diseases of male genital organs (N40-N51)                                                               | X |
| Disorders of breast (N60-N64)                                                                           | X |
| Inflammatory diseases of female pelvic organs (N70-N77)                                                 | X |
| Noninflammatory disorders of female genital tract (N80-N98)                                             | X |

170

171

Table S4: Inclusion and exclusion criteria for cluster 3. Female ratio: 71%, mean age of patients: 33, mortality: 0%.

|                                                                                                         |   |
|---------------------------------------------------------------------------------------------------------|---|
| Intestinal infectious diseases (A00-A09)                                                                | X |
| Other bacterial diseases (A30-A49)                                                                      | X |
| Infections with a predominantly sexual mode of transmission (A50-A64)                                   | X |
| Viral infections characterized by skin and mucous membrane lesions (B00-B09)                            | X |
| Other viral diseases (B25-B34)                                                                          | X |
| Malignant neoplasms (C00-C97)                                                                           | X |
| In situ neoplasms (D00-D09)                                                                             | X |
| Benign neoplasms (D10-D36)                                                                              | X |
| Neoplasms of uncertain or unknown behaviour (D37-D48)                                                   | X |
| Disorders of thyroid gland (E00-E07)                                                                    | X |
| Diabetes mellitus (E10-E14)                                                                             | X |
| Metabolic disorders (E70-E90)                                                                           | X |
| Mental and behavioural disorders due to psychoactive substance use (F10-F19)                            | X |
| Schizophrenia, schizotypal and delusional disorders (F20-F29)                                           | X |
| Mood [affective] disorders (F30-F39)                                                                    | X |
| Neurotic, stress-related and somatoform disorders (F40-F48)                                             | X |
| Behavioural and emotional disorders with onset usually occurring in childhood and adolescence (F90-F98) | ✓ |
| Episodic and paroxysmal disorders (G40-G47)                                                             | X |
| Nerve, nerve root and plexus disorders (G50-G59)                                                        | X |
| Disorders of eyelid, lacrimal system and orbit (H00-H06)                                                | X |
| Disorders of lens (H25-H28)                                                                             | X |
| Disorders of choroid and retina (H30-H36)                                                               | X |
| Disorders of ocular muscles, binocular movement, accommodation and refraction (H49-H52)                 | X |
| Diseases of middle ear and mastoid (H65-H75)                                                            | X |
| Diseases of inner ear (H80-H83)                                                                         | X |
| Other disorders of ear (H90-H95)                                                                        | X |
| Hypertensive diseases (I10-I15)                                                                         | X |
| Ischaemic heart diseases (I20-I25)                                                                      | X |
| Other forms of heart disease (I30-I52)                                                                  | X |
| Cerebrovascular diseases (I60-I69)                                                                      | X |
| Diseases of veins, lymphatic vessels and lymph nodes, not elsewhere classified (I80-I89)                | X |
| Acute upper respiratory infections (J00-J06)                                                            | X |
| Influenza and pneumonia (J09-J18)                                                                       | X |
| Other acute lower respiratory infections (J20-J22)                                                      | X |
| Other diseases of upper respiratory tract (J30-J39)                                                     | X |
| Chronic lower respiratory diseases (J40-J47)                                                            | X |
| Diseases of oral cavity, salivary glands and jaws (K00-K14)                                             | X |
| Diseases of oesophagus, stomach and duodenum (K20-K31)                                                  | X |
| Diseases of appendix (K35-K38)                                                                          | X |
| Hernia (K40-K46)                                                                                        | X |
| Noninfective enteritis and colitis (K50-K52)                                                            | X |
| Other diseases of intestines (K55-K63)                                                                  | X |
| Disorders of gallbladder, biliary tract and pancreas (K80-K87)                                          | X |
| Infections of the skin and subcutaneous tissue (L00-L08)                                                | X |
| Dermatitis and eczema (L20-L30)                                                                         | X |
| Urticaria and erythema (L50-L54)                                                                        | X |
| Disorders of skin appendages (L60-L75)                                                                  | X |
| Other disorders of the skin and subcutaneous tissue (L80-L99)                                           | X |
| Arthropathies (M00-M25)                                                                                 | X |
| Dorsopathies (M40-M54)                                                                                  | X |
| Soft tissue disorders (M60-M79)                                                                         | X |
| Osteopathies and chondropathies (M80-M94)                                                               | X |
| Renal tubulo-interstitial diseases (N10-N16)                                                            | X |
| Urolithiasis (N20-N23)                                                                                  | X |
| Other diseases of urinary system (N30-N39)                                                              | X |
| Diseases of male genital organs (N40-N51)                                                               | X |
| Disorders of breast (N60-N64)                                                                           | X |
| Inflammatory diseases of female pelvic organs (N70-N77)                                                 | X |
| Noninflammatory disorders of female genital tract (N80-N98)                                             | X |

172

173

Table S5: Inclusion and exclusion criteria for cluster 4. Female ratio: 29%, mean age of patients: 14, mortality: 0%.

|                                                                                          |   |
|------------------------------------------------------------------------------------------|---|
| Intestinal infectious diseases (A00-A09)                                                 | X |
| Other bacterial diseases (A30-A49)                                                       | X |
| Infections with a predominantly sexual mode of transmission (A50-A64)                    | X |
| Viral infections characterized by skin and mucous membrane lesions (B00-B09)             | X |
| Other viral diseases (B25-B34)                                                           | X |
| Malignant neoplasms (C00-C97)                                                            | X |
| In situ neoplasms (D00-D09)                                                              | X |
| Benign neoplasms (D10-D36)                                                               | X |
| Neoplasms of uncertain or unknown behaviour (D37-D48)                                    | X |
| Disorders of thyroid gland (E00-E07)                                                     | X |
| Diabetes mellitus (E10-E14)                                                              | X |
| Metabolic disorders (E70-E90)                                                            | X |
| Mental and behavioural disorders due to psychoactive substance use (F10-F19)             | X |
| Schizophrenia, schizotypal and delusional disorders (F20-F29)                            | X |
| Mood [affective] disorders (F30-F39)                                                     | X |
| Neurotic, stress-related and somatoform disorders (F40-F48)                              | X |
| Episodic and paroxysmal disorders (G40-G47)                                              | X |
| Nerve, nerve root and plexus disorders (G50-G59)                                         | X |
| Disorders of eyelid, lacrimal system and orbit (H00-H06)                                 | X |
| Disorders of lens (H25-H28)                                                              | X |
| Disorders of choroid and retina (H30-H36)                                                | X |
| Disorders of ocular muscles, binocular movement, accommodation and refraction (H49-H52)  | X |
| Diseases of middle ear and mastoid (H65-H75)                                             | X |
| Diseases of inner ear (H80-H83)                                                          | X |
| Other disorders of ear (H90-H95)                                                         | X |
| Hypertensive diseases (I10-I15)                                                          | X |
| Ischaemic heart diseases (I20-I25)                                                       | X |
| Other forms of heart disease (I30-I52)                                                   | X |
| Cerebrovascular diseases (I60-I69)                                                       | X |
| Diseases of veins, lymphatic vessels and lymph nodes, not elsewhere classified (I80-I89) | X |
| Acute upper respiratory infections (J00-J06)                                             | X |
| Influenza and pneumonia (J09-J18)                                                        | X |
| Other acute lower respiratory infections (J20-J22)                                       | X |
| Other diseases of upper respiratory tract (J30-J39)                                      | X |
| Chronic lower respiratory diseases (J40-J47)                                             | X |
| Diseases of oral cavity, salivary glands and jaws (K00-K14)                              | X |
| Diseases of oesophagus, stomach and duodenum (K20-K31)                                   | X |
| Diseases of appendix (K35-K38)                                                           | X |
| Hernia (K40-K46)                                                                         | X |
| Noninfective enteritis and colitis (K50-K52)                                             | X |
| Other diseases of intestines (K55-K63)                                                   | X |
| Disorders of gallbladder, biliary tract and pancreas (K80-K87)                           | X |
| Infections of the skin and subcutaneous tissue (L00-L08)                                 | X |
| Dermatitis and eczema (L20-L30)                                                          | X |
| Urticaria and erythema (L50-L54)                                                         | ✓ |
| Disorders of skin appendages (L60-L75)                                                   | X |
| Other disorders of the skin and subcutaneous tissue (L80-L99)                            | X |
| Arthropathies (M00-M25)                                                                  | X |
| Dorsopathies (M40-M54)                                                                   | X |
| Soft tissue disorders (M60-M79)                                                          | X |
| Osteopathies and chondropathies (M80-M94)                                                | X |
| Renal tubulo-interstitial diseases (N10-N16)                                             | X |
| Urolithiasis (N20-N23)                                                                   | X |
| Other diseases of urinary system (N30-N39)                                               | X |
| Diseases of male genital organs (N40-N51)                                                | X |
| Disorders of breast (N60-N64)                                                            | X |
| Inflammatory diseases of female pelvic organs (N70-N77)                                  | X |
| Noninflammatory disorders of female genital tract (N80-N98)                              | X |

174

175

Table S6: Inclusion and exclusion criteria for cluster 5. Female ratio: 54%, mean age of patients: 27, mortality: 0%.

|                                                                                          |   |
|------------------------------------------------------------------------------------------|---|
| Intestinal infectious diseases (A00-A09)                                                 | X |
| Other bacterial diseases (A30-A49)                                                       | X |
| Infections with a predominantly sexual mode of transmission (A50-A64)                    | X |
| Viral infections characterized by skin and mucous membrane lesions (B00-B09)             | X |
| Other viral diseases (B25-B34)                                                           | X |
| Malignant neoplasms (C00-C97)                                                            | X |
| In situ neoplasms (D00-D09)                                                              | X |
| Benign neoplasms (D10-D36)                                                               | X |
| Neoplasms of uncertain or unknown behaviour (D37-D48)                                    | X |
| Disorders of thyroid gland (E00-E07)                                                     | X |
| Diabetes mellitus (E10-E14)                                                              | ✓ |
| Metabolic disorders (E70-E90)                                                            | X |
| Mental and behavioural disorders due to psychoactive substance use (F10-F19)             | X |
| Schizophrenia, schizotypal and delusional disorders (F20-F29)                            | X |
| Mood [affective] disorders (F30-F39)                                                     | X |
| Neurotic, stress-related and somatoform disorders (F40-F48)                              | X |
| Episodic and paroxysmal disorders (G40-G47)                                              | X |
| Nerve, nerve root and plexus disorders (G50-G59)                                         | X |
| Disorders of eyelid, lacrimal system and orbit (H00-H06)                                 | X |
| Disorders of lens (H25-H28)                                                              | X |
| Disorders of choroid and retina (H30-H36)                                                | X |
| Disorders of ocular muscles, binocular movement, accommodation and refraction (H49-H52)  | X |
| Diseases of middle ear and mastoid (H65-H75)                                             | X |
| Diseases of inner ear (H80-H83)                                                          | X |
| Other disorders of ear (H90-H95)                                                         | X |
| Hypertensive diseases (I10-I15)                                                          | X |
| Ischaemic heart diseases (I20-I25)                                                       | X |
| Other forms of heart disease (I30-I52)                                                   | X |
| 176 Cerebrovascular diseases (I60-I69)                                                   | X |
| Diseases of veins, lymphatic vessels and lymph nodes, not elsewhere classified (I80-I89) | X |
| Acute upper respiratory infections (J00-J06)                                             | X |
| Influenza and pneumonia (J09-J18)                                                        | X |
| Other acute lower respiratory infections (J20-J22)                                       | X |
| Other diseases of upper respiratory tract (J30-J39)                                      | X |
| Chronic lower respiratory diseases (J40-J47)                                             | X |
| Diseases of oral cavity, salivary glands and jaws (K00-K14)                              | X |
| Diseases of oesophagus, stomach and duodenum (K20-K31)                                   | X |
| Diseases of appendix (K35-K38)                                                           | X |
| Hernia (K40-K46)                                                                         | X |
| Noninfective enteritis and colitis (K50-K52)                                             | X |
| Other diseases of intestines (K55-K63)                                                   | X |
| Disorders of gallbladder, biliary tract and pancreas (K80-K87)                           | X |
| Infections of the skin and subcutaneous tissue (L00-L08)                                 | X |
| Dermatitis and eczema (L20-L30)                                                          | X |
| Disorders of skin appendages (L60-L75)                                                   | X |
| Other disorders of the skin and subcutaneous tissue (L80-L99)                            | X |
| Arthropathies (M00-M25)                                                                  | X |
| Dorsopathies (M40-M54)                                                                   | X |
| Soft tissue disorders (M60-M79)                                                          | X |
| Osteopathies and chondropathies (M80-M94)                                                | X |
| Renal tubulo-interstitial diseases (N10-N16)                                             | X |
| Urolithiasis (N20-N23)                                                                   | X |
| Other diseases of urinary system (N30-N39)                                               | X |
| Diseases of male genital organs (N40-N51)                                                | X |
| Disorders of breast (N60-N64)                                                            | X |
| Inflammatory diseases of female pelvic organs (N70-N77)                                  | X |
| Noninflammatory disorders of female genital tract (N80-N98)                              | X |

177 Table S7: Inclusion and exclusion criteria for cluster 6. Female ratio: 42%, mean age of patients: 47, mortality: 0%.

|                                                                                          |   |
|------------------------------------------------------------------------------------------|---|
| Intestinal infectious diseases (A00-A09)                                                 | X |
| Other bacterial diseases (A30-A49)                                                       | X |
| Infections with a predominantly sexual mode of transmission (A50-A64)                    | X |
| Viral infections characterized by skin and mucous membrane lesions (B00-B09)             | X |
| Other viral diseases (B25-B34)                                                           | X |
| Malignant neoplasms (C00-C97)                                                            | X |
| In situ neoplasms (D00-D09)                                                              | ✓ |
| Benign neoplasms (D10-D36)                                                               | X |
| Neoplasms of uncertain or unknown behaviour (D37-D48)                                    | X |
| Disorders of thyroid gland (E00-E07)                                                     | X |
| Metabolic disorders (E70-E90)                                                            | X |
| Mental and behavioural disorders due to psychoactive substance use (F10-F19)             | X |
| Schizophrenia, schizotypal and delusional disorders (F20-F29)                            | X |
| Mood [affective] disorders (F30-F39)                                                     | X |
| Neurotic, stress-related and somatoform disorders (F40-F48)                              | X |
| Episodic and paroxysmal disorders (G40-G47)                                              | X |
| Nerve, nerve root and plexus disorders (G50-G59)                                         | X |
| Disorders of eyelid, lacrimal system and orbit (H00-H06)                                 | X |
| Disorders of lens (H25-H28)                                                              | X |
| Disorders of choroid and retina (H30-H36)                                                | X |
| Disorders of ocular muscles, binocular movement, accommodation and refraction (H49-H52)  | X |
| Diseases of middle ear and mastoid (H65-H75)                                             | X |
| Diseases of inner ear (H80-H83)                                                          | X |
| Other disorders of ear (H90-H95)                                                         | X |
| Hypertensive diseases (I10-I15)                                                          | X |
| Ischaemic heart diseases (I20-I25)                                                       | X |
| Other forms of heart disease (I30-I52)                                                   | X |
| Cerebrovascular diseases (I60-I69)                                                       | X |
| Diseases of veins, lymphatic vessels and lymph nodes, not elsewhere classified (I80-I89) | X |
| Acute upper respiratory infections (J00-J06)                                             | X |
| Influenza and pneumonia (J09-J18)                                                        | X |
| Other acute lower respiratory infections (J20-J22)                                       | X |
| Other diseases of upper respiratory tract (J30-J39)                                      | X |
| Chronic lower respiratory diseases (J40-J47)                                             | X |
| Diseases of oral cavity, salivary glands and jaws (K00-K14)                              | X |
| Diseases of oesophagus, stomach and duodenum (K20-K31)                                   | X |
| Diseases of appendix (K35-K38)                                                           | X |
| Hernia (K40-K46)                                                                         | X |
| Noninfective enteritis and colitis (K50-K52)                                             | X |
| Other diseases of intestines (K55-K63)                                                   | X |
| Disorders of gallbladder, biliary tract and pancreas (K80-K87)                           | X |
| Infections of the skin and subcutaneous tissue (L00-L08)                                 | X |
| Dermatitis and eczema (L20-L30)                                                          | X |
| Disorders of skin appendages (L60-L75)                                                   | X |
| Other disorders of the skin and subcutaneous tissue (L80-L99)                            | X |
| Arthropathies (M00-M25)                                                                  | X |
| Dorsopathies (M40-M54)                                                                   | X |
| Soft tissue disorders (M60-M79)                                                          | X |
| Osteopathies and chondropathies (M80-M94)                                                | X |
| Renal tubulo-interstitial diseases (N10-N16)                                             | X |
| Urolithiasis (N20-N23)                                                                   | X |
| Other diseases of urinary system (N30-N39)                                               | X |
| Diseases of male genital organs (N40-N51)                                                | X |
| Disorders of breast (N60-N64)                                                            | X |
| Inflammatory diseases of female pelvic organs (N70-N77)                                  | X |
| Noninflammatory disorders of female genital tract (N80-N98)                              | X |

178

179

Table S8: Inclusion and exclusion criteria for cluster 7. Female ratio: 97%, mean age of patients: 38, mortality: 0%.

|     |                                                                                          |   |
|-----|------------------------------------------------------------------------------------------|---|
|     | Intestinal infectious diseases (A00-A09)                                                 | X |
|     | Other bacterial diseases (A30-A49)                                                       | X |
|     | Infections with a predominantly sexual mode of transmission (A50-A64)                    | X |
|     | Viral infections characterized by skin and mucous membrane lesions (B00-B09)             | X |
|     | Other viral diseases (B25-B34)                                                           | X |
|     | Malignant neoplasms (C00-C97)                                                            | X |
|     | Benign neoplasms (D10-D36)                                                               | X |
|     | Neoplasms of uncertain or unknown behaviour (D37-D48)                                    | X |
|     | Disorders of thyroid gland (E00-E07)                                                     | X |
|     | Metabolic disorders (E70-E90)                                                            | X |
|     | Mental and behavioural disorders due to psychoactive substance use (F10-F19)             | X |
|     | Schizophrenia, schizotypal and delusional disorders (F20-F29)                            | X |
|     | Mood [affective] disorders (F30-F39)                                                     | X |
|     | Neurotic, stress-related and somatoform disorders (F40-F48)                              | X |
|     | Episodic and paroxysmal disorders (G40-G47)                                              | X |
|     | Nerve, nerve root and plexus disorders (G50-G59)                                         | X |
|     | Disorders of eyelid, lacrimal system and orbit (H00-H06)                                 | X |
|     | Disorders of lens (H25-H28)                                                              | X |
|     | Disorders of choroid and retina (H30-H36)                                                | X |
|     | Disorders of ocular muscles, binocular movement, accommodation and refraction (H49-H52)  | X |
|     | Diseases of middle ear and mastoid (H65-H75)                                             | X |
|     | Diseases of inner ear (H80-H83)                                                          | X |
|     | Other disorders of ear (H90-H95)                                                         | X |
|     | Hypertensive diseases (I10-I15)                                                          | X |
|     | Ischaemic heart diseases (I20-I25)                                                       | X |
|     | Other forms of heart disease (I30-I52)                                                   | X |
|     | Cerebrovascular diseases (I60-I69)                                                       | X |
| 180 | Diseases of veins, lymphatic vessels and lymph nodes, not elsewhere classified (I80-I89) | X |
|     | Acute upper respiratory infections (J00-J06)                                             | X |
|     | Influenza and pneumonia (J09-J18)                                                        | X |
|     | Other acute lower respiratory infections (J20-J22)                                       | X |
|     | Other diseases of upper respiratory tract (J30-J39)                                      | X |
|     | Chronic lower respiratory diseases (J40-J47)                                             | X |
|     | Diseases of oral cavity, salivary glands and jaws (K00-K14)                              | X |
|     | Diseases of oesophagus, stomach and duodenum (K20-K31)                                   | X |
|     | Diseases of appendix (K35-K38)                                                           | X |
|     | Hernia (K40-K46)                                                                         | X |
|     | Noninfective enteritis and colitis (K50-K52)                                             | X |
|     | Other diseases of intestines (K55-K63)                                                   | X |
|     | Disorders of gallbladder, biliary tract and pancreas (K80-K87)                           | X |
|     | Infections of the skin and subcutaneous tissue (L00-L08)                                 | X |
|     | Dermatitis and eczema (L20-L30)                                                          | ✓ |
|     | Disorders of skin appendages (L60-L75)                                                   | X |
|     | Other disorders of the skin and subcutaneous tissue (L80-L99)                            | X |
|     | Arthropathies (M00-M25)                                                                  | X |
|     | Dorsopathies (M40-M54)                                                                   | X |
|     | Soft tissue disorders (M60-M79)                                                          | X |
|     | Osteopathies and chondropathies (M80-M94)                                                | X |
|     | Renal tubulo-interstitial diseases (N10-N16)                                             | X |
|     | Urolithiasis (N20-N23)                                                                   | X |
|     | Other diseases of urinary system (N30-N39)                                               | X |
|     | Diseases of male genital organs (N40-N51)                                                | X |
|     | Disorders of breast (N60-N64)                                                            | X |
|     | Inflammatory diseases of female pelvic organs (N70-N77)                                  | X |
|     | Noninflammatory disorders of female genital tract (N80-N98)                              | X |

181 Table S9: Inclusion and exclusion criteria for cluster 8. Female ratio: 57%, mean age of patients: 27, mortality: 0%.



|                                                                                              |   |
|----------------------------------------------------------------------------------------------|---|
| Intestinal infectious diseases (A00-A09)                                                     | X |
| Other bacterial diseases (A30-A49)                                                           | X |
| Infections with a predominantly sexual mode of transmission (A50-A64)                        | X |
| Viral infections characterized by skin and mucous membrane lesions (B00-B09)                 | X |
| Other viral diseases (B25-B34)                                                               | X |
| Malignant neoplasms (C00-C97)                                                                | X |
| Benign neoplasms (D10-D36)                                                                   | X |
| Neoplasms of uncertain or unknown behaviour (D37-D48)                                        | X |
| Disorders of thyroid gland (E00-E07)                                                         | X |
| Metabolic disorders (E70-E90)                                                                | X |
| Mental and behavioural disorders due to psychoactive substance use (F10-F19)                 | X |
| Schizophrenia, schizotypal and delusional disorders (F20-F29)                                | X |
| Mood [affective] disorders (F30-F39)                                                         | X |
| Neurotic, stress-related and somatoform disorders (F40-F48)                                  | X |
| Episodic and paroxysmal disorders (G40-G47)                                                  | X |
| Nerve, nerve root and plexus disorders (G50-G59)                                             | X |
| Disorders of eyelid, lacrimal system and orbit (H00-H06)                                     | X |
| Disorders of lens (H25-H28)                                                                  | X |
| Disorders of choroid and retina (H30-H36)                                                    | X |
| Disorders of ocular muscles, binocular movement, accommodation and refraction (H49-H52)      | X |
| Diseases of middle ear and mastoid (H65-H75)                                                 | X |
| Diseases of inner ear (H80-H83)                                                              | X |
| Other disorders of ear (H90-H95)                                                             | X |
| Hypertensive diseases (I10-I15)                                                              | X |
| Ischaemic heart diseases (I20-I25)                                                           | ✓ |
| Other forms of heart disease (I30-I52)                                                       | X |
| Cerebrovascular diseases (I60-I69)                                                           | X |
| 182 Diseases of veins, lymphatic vessels and lymph nodes, not elsewhere classified (I80-I89) | X |
| Acute upper respiratory infections (J00-J06)                                                 | X |
| Influenza and pneumonia (J09-J18)                                                            | X |
| Other acute lower respiratory infections (J20-J22)                                           | X |
| Other diseases of upper respiratory tract (J30-J39)                                          | X |
| Chronic lower respiratory diseases (J40-J47)                                                 | X |
| Diseases of oral cavity, salivary glands and jaws (K00-K14)                                  | X |
| Diseases of oesophagus, stomach and duodenum (K20-K31)                                       | X |
| Diseases of appendix (K35-K38)                                                               | X |
| Hernia (K40-K46)                                                                             | X |
| Noninfective enteritis and colitis (K50-K52)                                                 | X |
| Other diseases of intestines (K55-K63)                                                       | X |
| Disorders of gallbladder, biliary tract and pancreas (K80-K87)                               | X |
| Infections of the skin and subcutaneous tissue (L00-L08)                                     | X |
| Disorders of skin appendages (L60-L75)                                                       | X |
| Other disorders of the skin and subcutaneous tissue (L80-L99)                                | X |
| Arthropathies (M00-M25)                                                                      | X |
| Dorsopathies (M40-M54)                                                                       | X |
| Soft tissue disorders (M60-M79)                                                              | X |
| Osteopathies and chondropathies (M80-M94)                                                    | X |
| Renal tubulo-interstitial diseases (N10-N16)                                                 | X |
| Urolithiasis (N20-N23)                                                                       | X |
| Other diseases of urinary system (N30-N39)                                                   | X |
| Diseases of male genital organs (N40-N51)                                                    | X |
| Disorders of breast (N60-N64)                                                                | X |
| Inflammatory diseases of female pelvic organs (N70-N77)                                      | X |
| Noninflammatory disorders of female genital tract (N80-N98)                                  | X |

183

Table S10: Inclusion and exclusion criteria for cluster 9. Female ratio: 32%, mean age of patients: 63, mortality: 2%.

|                                                                                              |   |
|----------------------------------------------------------------------------------------------|---|
| Intestinal infectious diseases (A00-A09)                                                     | X |
| Other bacterial diseases (A30-A49)                                                           | X |
| Infections with a predominantly sexual mode of transmission (A50-A64)                        | X |
| Viral infections characterized by skin and mucous membrane lesions (B00-B09)                 | X |
| Other viral diseases (B25-B34)                                                               | X |
| Malignant neoplasms (C00-C97)                                                                | X |
| Benign neoplasms (D10-D36)                                                                   | X |
| Neoplasms of uncertain or unknown behaviour (D37-D48)                                        | X |
| Disorders of thyroid gland (E00-E07)                                                         | X |
| Metabolic disorders (E70-E90)                                                                | X |
| Mental and behavioural disorders due to psychoactive substance use (F10-F19)                 | X |
| Schizophrenia, schizotypal and delusional disorders (F20-F29)                                | X |
| Mood [affective] disorders (F30-F39)                                                         | X |
| Neurotic, stress-related and somatoform disorders (F40-F48)                                  | X |
| Episodic and paroxysmal disorders (G40-G47)                                                  | X |
| Nerve, nerve root and plexus disorders (G50-G59)                                             | X |
| Disorders of eyelid, lacrimal system and orbit (H00-H06)                                     | X |
| Disorders of lens (H25-H28)                                                                  | X |
| Disorders of choroid and retina (H30-H36)                                                    | X |
| Disorders of ocular muscles, binocular movement, accommodation and refraction (H49-H52)      | X |
| Diseases of middle ear and mastoid (H65-H75)                                                 | X |
| Diseases of inner ear (H80-H83)                                                              | X |
| Other disorders of ear (H90-H95)                                                             | X |
| Hypertensive diseases (I10-I15)                                                              | X |
| Other forms of heart disease (I30-I52)                                                       | X |
| Cerebrovascular diseases (I60-I69)                                                           | X |
| 184 Diseases of veins, lymphatic vessels and lymph nodes, not elsewhere classified (I80-I89) | X |
| Acute upper respiratory infections (J00-J06)                                                 | X |
| Influenza and pneumonia (J09-J18)                                                            | X |
| Other acute lower respiratory infections (J20-J22)                                           | X |
| Other diseases of upper respiratory tract (J30-J39)                                          | X |
| Chronic lower respiratory diseases (J40-J47)                                                 | X |
| Diseases of oral cavity, salivary glands and jaws (K00-K14)                                  | X |
| Diseases of oesophagus, stomach and duodenum (K20-K31)                                       | X |
| Diseases of appendix (K35-K38)                                                               | X |
| Hernia (K40-K46)                                                                             | X |
| Noninfective enteritis and colitis (K50-K52)                                                 | X |
| Other diseases of intestines (K55-K63)                                                       | X |
| Disorders of gallbladder, biliary tract and pancreas (K80-K87)                               | X |
| Infections of the skin and subcutaneous tissue (L00-L08)                                     | X |
| Disorders of skin appendages (L60-L75)                                                       | X |
| Other disorders of the skin and subcutaneous tissue (L80-L99)                                | ✓ |
| Arthropathies (M00-M25)                                                                      | X |
| Dorsopathies (M40-M54)                                                                       | X |
| Soft tissue disorders (M60-M79)                                                              | X |
| Osteopathies and chondropathies (M80-M94)                                                    | X |
| Renal tubulo-interstitial diseases (N10-N16)                                                 | X |
| Urolithiasis (N20-N23)                                                                       | X |
| Other diseases of urinary system (N30-N39)                                                   | X |
| Diseases of male genital organs (N40-N51)                                                    | X |
| Disorders of breast (N60-N64)                                                                | X |
| Inflammatory diseases of female pelvic organs (N70-N77)                                      | X |
| Noninflammatory disorders of female genital tract (N80-N98)                                  | X |

185 Table S11: Inclusion and exclusion criteria for cluster 10. Female ratio: 55%, mean age of patients: 39, mortality: 0%.

|                                                                                          |   |
|------------------------------------------------------------------------------------------|---|
| Intestinal infectious diseases (A00-A09)                                                 | X |
| Other bacterial diseases (A30-A49)                                                       | X |
| Infections with a predominantly sexual mode of transmission (A50-A64)                    | X |
| Viral infections characterized by skin and mucous membrane lesions (B00-B09)             | X |
| Other viral diseases (B25-B34)                                                           | X |
| Malignant neoplasms (C00-C97)                                                            | X |
| Benign neoplasms (D10-D36)                                                               | X |
| Neoplasms of uncertain or unknown behaviour (D37-D48)                                    | X |
| Disorders of thyroid gland (E00-E07)                                                     | X |
| Metabolic disorders (E70-E90)                                                            | X |
| Mental and behavioural disorders due to psychoactive substance use (F10-F19)             | X |
| Schizophrenia, schizotypal and delusional disorders (F20-F29)                            | X |
| Mood [affective] disorders (F30-F39)                                                     | X |
| Neurotic, stress-related and somatoform disorders (F40-F48)                              | X |
| Episodic and paroxysmal disorders (G40-G47)                                              | X |
| Nerve, nerve root and plexus disorders (G50-G59)                                         | X |
| Disorders of eyelid, lacrimal system and orbit (H00-H06)                                 | X |
| Disorders of lens (H25-H28)                                                              | X |
| Disorders of choroid and retina (H30-H36)                                                | X |
| Disorders of ocular muscles, binocular movement, accommodation and refraction (H49-H52)  | X |
| Diseases of middle ear and mastoid (H65-H75)                                             | X |
| Diseases of inner ear (H80-H83)                                                          | X |
| Other disorders of ear (H90-H95)                                                         | X |
| Hypertensive diseases (I10-I15)                                                          | X |
| Other forms of heart disease (I30-I52)                                                   | X |
| Cerebrovascular diseases (I60-I69)                                                       | ✓ |
| Diseases of veins, lymphatic vessels and lymph nodes, not elsewhere classified (I80-I89) | X |
| Acute upper respiratory infections (J00-J06)                                             | X |
| Influenza and pneumonia (J09-J18)                                                        | X |
| Other acute lower respiratory infections (J20-J22)                                       | X |
| Other diseases of upper respiratory tract (J30-J39)                                      | X |
| Chronic lower respiratory diseases (J40-J47)                                             | X |
| Diseases of oral cavity, salivary glands and jaws (K00-K14)                              | X |
| Diseases of oesophagus, stomach and duodenum (K20-K31)                                   | X |
| Diseases of appendix (K35-K38)                                                           | X |
| Hernia (K40-K46)                                                                         | X |
| Noninfective enteritis and colitis (K50-K52)                                             | X |
| Other diseases of intestines (K55-K63)                                                   | X |
| Disorders of gallbladder, biliary tract and pancreas (K80-K87)                           | X |
| Infections of the skin and subcutaneous tissue (L00-L08)                                 | X |
| Disorders of skin appendages (L60-L75)                                                   | X |
| Arthropathies (M00-M25)                                                                  | X |
| Dorsopathies (M40-M54)                                                                   | X |
| Soft tissue disorders (M60-M79)                                                          | X |
| Osteopathies and chondropathies (M80-M94)                                                | X |
| Renal tubulo-interstitial diseases (N10-N16)                                             | X |
| Urolithiasis (N20-N23)                                                                   | X |
| Other diseases of urinary system (N30-N39)                                               | X |
| Diseases of male genital organs (N40-N51)                                                | X |
| Disorders of breast (N60-N64)                                                            | X |
| Inflammatory diseases of female pelvic organs (N70-N77)                                  | X |
| Noninflammatory disorders of female genital tract (N80-N98)                              | X |

186

187

Table S12: Inclusion and exclusion criteria for cluster 11. Female ratio: 47%, mean age of patients: 61, mortality: 4%.

|     |                                                                                          |   |
|-----|------------------------------------------------------------------------------------------|---|
|     | Intestinal infectious diseases (A00-A09)                                                 | X |
|     | Other bacterial diseases (A30-A49)                                                       | X |
|     | Infections with a predominantly sexual mode of transmission (A50-A64)                    | X |
|     | Viral infections characterized by skin and mucous membrane lesions (B00-B09)             | X |
|     | Other viral diseases (B25-B34)                                                           | ✓ |
|     | Malignant neoplasms (C00-C97)                                                            | X |
|     | Benign neoplasms (D10-D36)                                                               | X |
|     | Neoplasms of uncertain or unknown behaviour (D37-D48)                                    | X |
|     | Disorders of thyroid gland (E00-E07)                                                     | X |
|     | Metabolic disorders (E70-E90)                                                            | X |
|     | Mental and behavioural disorders due to psychoactive substance use (F10-F19)             | X |
|     | Schizophrenia, schizotypal and delusional disorders (F20-F29)                            | X |
|     | Mood [affective] disorders (F30-F39)                                                     | X |
|     | Neurotic, stress-related and somatoform disorders (F40-F48)                              | X |
|     | Episodic and paroxysmal disorders (G40-G47)                                              | X |
|     | Nerve, nerve root and plexus disorders (G50-G59)                                         | X |
|     | Disorders of eyelid, lacrimal system and orbit (H00-H06)                                 | X |
|     | Disorders of lens (H25-H28)                                                              | X |
|     | Disorders of choroid and retina (H30-H36)                                                | X |
|     | Disorders of ocular muscles, binocular movement, accommodation and refraction (H49-H52)  | X |
|     | Diseases of middle ear and mastoid (H65-H75)                                             | X |
|     | Diseases of inner ear (H80-H83)                                                          | X |
|     | Other disorders of ear (H90-H95)                                                         | X |
|     | Hypertensive diseases (I10-I15)                                                          | X |
|     | Other forms of heart disease (I30-I52)                                                   | X |
| 188 | Diseases of veins, lymphatic vessels and lymph nodes, not elsewhere classified (I80-I89) | X |
|     | Acute upper respiratory infections (J00-J06)                                             | X |
|     | Influenza and pneumonia (J09-J18)                                                        | X |
|     | Other acute lower respiratory infections (J20-J22)                                       | X |
|     | Other diseases of upper respiratory tract (J30-J39)                                      | X |
|     | Chronic lower respiratory diseases (J40-J47)                                             | X |
|     | Diseases of oral cavity, salivary glands and jaws (K00-K14)                              | X |
|     | Diseases of oesophagus, stomach and duodenum (K20-K31)                                   | X |
|     | Diseases of appendix (K35-K38)                                                           | X |
|     | Hernia (K40-K46)                                                                         | X |
|     | Noninfective enteritis and colitis (K50-K52)                                             | X |
|     | Other diseases of intestines (K55-K63)                                                   | X |
|     | Disorders of gallbladder, biliary tract and pancreas (K80-K87)                           | X |
|     | Infections of the skin and subcutaneous tissue (L00-L08)                                 | X |
|     | Disorders of skin appendages (L60-L75)                                                   | X |
|     | Arthropathies (M00-M25)                                                                  | X |
|     | Dorsopathies (M40-M54)                                                                   | X |
|     | Soft tissue disorders (M60-M79)                                                          | X |
|     | Osteopathies and chondropathies (M80-M94)                                                | X |
|     | Renal tubulo-interstitial diseases (N10-N16)                                             | X |
|     | Urolithiasis (N20-N23)                                                                   | X |
|     | Other diseases of urinary system (N30-N39)                                               | X |
|     | Diseases of male genital organs (N40-N51)                                                | X |
|     | Disorders of breast (N60-N64)                                                            | X |
|     | Inflammatory diseases of female pelvic organs (N70-N77)                                  | X |
|     | Noninflammatory disorders of female genital tract (N80-N98)                              | X |

189 Table S13: Inclusion and exclusion criteria for cluster 12. Female ratio: 47%, mean age of patients: 18, mortality: 0%.

|                                                                                          |   |
|------------------------------------------------------------------------------------------|---|
| Intestinal infectious diseases (A00-A09)                                                 | X |
| Other bacterial diseases (A30-A49)                                                       | X |
| Infections with a predominantly sexual mode of transmission (A50-A64)                    | X |
| Viral infections characterized by skin and mucous membrane lesions (B00-B09)             | X |
| Malignant neoplasms (C00-C97)                                                            | X |
| Benign neoplasms (D10-D36)                                                               | X |
| Neoplasms of uncertain or unknown behaviour (D37-D48)                                    | X |
| Disorders of thyroid gland (E00-E07)                                                     | X |
| Metabolic disorders (E70-E90)                                                            | X |
| Mental and behavioural disorders due to psychoactive substance use (F10-F19)             | X |
| Schizophrenia, schizotypal and delusional disorders (F20-F29)                            | X |
| Mood [affective] disorders (F30-F39)                                                     | X |
| Neurotic, stress-related and somatoform disorders (F40-F48)                              | X |
| Episodic and paroxysmal disorders (G40-G47)                                              | X |
| Nerve, nerve root and plexus disorders (G50-G59)                                         | X |
| Disorders of eyelid, lacrimal system and orbit (H00-H06)                                 | X |
| Disorders of lens (H25-H28)                                                              | X |
| Disorders of choroid and retina (H30-H36)                                                | X |
| Disorders of ocular muscles, binocular movement, accommodation and refraction (H49-H52)  | X |
| Diseases of middle ear and mastoid (H65-H75)                                             | X |
| Diseases of inner ear (H80-H83)                                                          | ✓ |
| Other disorders of ear (H90-H95)                                                         | X |
| Hypertensive diseases (I10-I15)                                                          | X |
| Other forms of heart disease (I30-I52)                                                   | X |
| Diseases of veins, lymphatic vessels and lymph nodes, not elsewhere classified (I80-I89) | X |
| Acute upper respiratory infections (J00-J06)                                             | X |
| Influenza and pneumonia (J09-J18)                                                        | X |
| Other acute lower respiratory infections (J20-J22)                                       | X |
| Other diseases of upper respiratory tract (J30-J39)                                      | X |
| Chronic lower respiratory diseases (J40-J47)                                             | X |
| Diseases of oral cavity, salivary glands and jaws (K00-K14)                              | X |
| Diseases of oesophagus, stomach and duodenum (K20-K31)                                   | X |
| Diseases of appendix (K35-K38)                                                           | X |
| Hernia (K40-K46)                                                                         | X |
| Noninfective enteritis and colitis (K50-K52)                                             | X |
| Other diseases of intestines (K55-K63)                                                   | X |
| Disorders of gallbladder, biliary tract and pancreas (K80-K87)                           | X |
| Infections of the skin and subcutaneous tissue (L00-L08)                                 | X |
| Disorders of skin appendages (L60-L75)                                                   | X |
| Arthropathies (M00-M25)                                                                  | X |
| Dorsopathies (M40-M54)                                                                   | X |
| Soft tissue disorders (M60-M79)                                                          | X |
| Osteopathies and chondropathies (M80-M94)                                                | X |
| Renal tubulo-interstitial diseases (N10-N16)                                             | X |
| Urolithiasis (N20-N23)                                                                   | X |
| Other diseases of urinary system (N30-N39)                                               | X |
| Diseases of male genital organs (N40-N51)                                                | X |
| Disorders of breast (N60-N64)                                                            | X |
| Inflammatory diseases of female pelvic organs (N70-N77)                                  | X |
| Noninflammatory disorders of female genital tract (N80-N98)                              | X |

190 191 Table S14: Inclusion and exclusion criteria for cluster 13. Female ratio: 51%, mean age of patients: 45, mortality: 0%.

|     |                                                                                          |   |
|-----|------------------------------------------------------------------------------------------|---|
|     | Intestinal infectious diseases (A00-A09)                                                 | X |
|     | Other bacterial diseases (A30-A49)                                                       | ✓ |
|     | Infections with a predominantly sexual mode of transmission (A50-A64)                    | X |
|     | Viral infections characterized by skin and mucous membrane lesions (B00-B09)             | X |
|     | Malignant neoplasms (C00-C97)                                                            | X |
|     | Benign neoplasms (D10-D36)                                                               | X |
|     | Neoplasms of uncertain or unknown behaviour (D37-D48)                                    | X |
|     | Disorders of thyroid gland (E00-E07)                                                     | X |
|     | Metabolic disorders (E70-E90)                                                            | X |
|     | Mental and behavioural disorders due to psychoactive substance use (F10-F19)             | X |
|     | Schizophrenia, schizotypal and delusional disorders (F20-F29)                            | X |
|     | Mood [affective] disorders (F30-F39)                                                     | X |
|     | Neurotic, stress-related and somatoform disorders (F40-F48)                              | X |
|     | Episodic and paroxysmal disorders (G40-G47)                                              | X |
|     | Nerve, nerve root and plexus disorders (G50-G59)                                         | X |
|     | Disorders of eyelid, lacrimal system and orbit (H00-H06)                                 | X |
|     | Disorders of lens (H25-H28)                                                              | X |
|     | Disorders of choroid and retina (H30-H36)                                                | X |
|     | Disorders of ocular muscles, binocular movement, accommodation and refraction (H49-H52)  | X |
|     | Diseases of middle ear and mastoid (H65-H75)                                             | X |
|     | Other disorders of ear (H90-H95)                                                         | X |
|     | Hypertensive diseases (I10-I15)                                                          | X |
|     | Other forms of heart disease (I30-I52)                                                   | X |
|     | Diseases of veins, lymphatic vessels and lymph nodes, not elsewhere classified (I80-I89) | X |
| 192 | Acute upper respiratory infections (J00-J06)                                             | X |
|     | Influenza and pneumonia (J09-J18)                                                        | X |
|     | Other acute lower respiratory infections (J20-J22)                                       | X |
|     | Other diseases of upper respiratory tract (J30-J39)                                      | X |
|     | Chronic lower respiratory diseases (J40-J47)                                             | X |
|     | Diseases of oral cavity, salivary glands and jaws (K00-K14)                              | X |
|     | Diseases of oesophagus, stomach and duodenum (K20-K31)                                   | X |
|     | Diseases of appendix (K35-K38)                                                           | X |
|     | Hernia (K40-K46)                                                                         | X |
|     | Noninfective enteritis and colitis (K50-K52)                                             | X |
|     | Other diseases of intestines (K55-K63)                                                   | X |
|     | Disorders of gallbladder, biliary tract and pancreas (K80-K87)                           | X |
|     | Infections of the skin and subcutaneous tissue (L00-L08)                                 | X |
|     | Disorders of skin appendages (L60-L75)                                                   | X |
|     | Arthropathies (M00-M25)                                                                  | X |
|     | Dorsopathies (M40-M54)                                                                   | X |
|     | Soft tissue disorders (M60-M79)                                                          | X |
|     | Osteopathies and chondropathies (M80-M94)                                                | X |
|     | Renal tubulo-interstitial diseases (N10-N16)                                             | X |
|     | Urolithiasis (N20-N23)                                                                   | X |
|     | Other diseases of urinary system (N30-N39)                                               | X |
|     | Diseases of male genital organs (N40-N51)                                                | X |
|     | Disorders of breast (N60-N64)                                                            | X |
|     | Inflammatory diseases of female pelvic organs (N70-N77)                                  | X |
|     | Noninflammatory disorders of female genital tract (N80-N98)                              | X |

193 Table S15: Inclusion and exclusion criteria for cluster 14. Female ratio: 45%, mean age of patients: 36, mortality: 1%.

|                                                                                          |   |
|------------------------------------------------------------------------------------------|---|
| Intestinal infectious diseases (A00-A09)                                                 | X |
| Infections with a predominantly sexual mode of transmission (A50-A64)                    | X |
| Viral infections characterized by skin and mucous membrane lesions (B00-B09)             | X |
| Malignant neoplasms (C00-C97)                                                            | X |
| Benign neoplasms (D10-D36)                                                               | X |
| Neoplasms of uncertain or unknown behaviour (D37-D48)                                    | X |
| Disorders of thyroid gland (E00-E07)                                                     | X |
| Metabolic disorders (E70-E90)                                                            | X |
| Mental and behavioural disorders due to psychoactive substance use (F10-F19)             | X |
| Schizophrenia, schizotypal and delusional disorders (F20-F29)                            | X |
| Mood [affective] disorders (F30-F39)                                                     | X |
| Neurotic, stress-related and somatoform disorders (F40-F48)                              | X |
| Episodic and paroxysmal disorders (G40-G47)                                              | X |
| Nerve, nerve root and plexus disorders (G50-G59)                                         | X |
| Disorders of eyelid, lacrimal system and orbit (H00-H06)                                 | X |
| Disorders of lens (H25-H28)                                                              | X |
| Disorders of choroid and retina (H30-H36)                                                | ✓ |
| Disorders of ocular muscles, binocular movement, accommodation and refraction (H49-H52)  | X |
| Diseases of middle ear and mastoid (H65-H75)                                             | X |
| Other disorders of ear (H90-H95)                                                         | X |
| Hypertensive diseases (I10-I15)                                                          | X |
| Other forms of heart disease (I30-I52)                                                   | X |
| Diseases of veins, lymphatic vessels and lymph nodes, not elsewhere classified (I80-I89) | X |
| Acute upper respiratory infections (J00-J06)                                             | X |
| Influenza and pneumonia (J09-J18)                                                        | X |
| Other acute lower respiratory infections (J20-J22)                                       | X |
| Other diseases of upper respiratory tract (J30-J39)                                      | X |
| Chronic lower respiratory diseases (J40-J47)                                             | X |
| Diseases of oral cavity, salivary glands and jaws (K00-K14)                              | X |
| Diseases of oesophagus, stomach and duodenum (K20-K31)                                   | X |
| Diseases of appendix (K35-K38)                                                           | X |
| Hernia (K40-K46)                                                                         | X |
| Noninfective enteritis and colitis (K50-K52)                                             | X |
| Other diseases of intestines (K55-K63)                                                   | X |
| Disorders of gallbladder, biliary tract and pancreas (K80-K87)                           | X |
| Infections of the skin and subcutaneous tissue (L00-L08)                                 | X |
| Disorders of skin appendages (L60-L75)                                                   | X |
| Arthropathies (M00-M25)                                                                  | X |
| Dorsopathies (M40-M54)                                                                   | X |
| Soft tissue disorders (M60-M79)                                                          | X |
| Osteopathies and chondropathies (M80-M94)                                                | X |
| Renal tubulo-interstitial diseases (N10-N16)                                             | X |
| Urolithiasis (N20-N23)                                                                   | X |
| Other diseases of urinary system (N30-N39)                                               | X |
| Diseases of male genital organs (N40-N51)                                                | X |
| Disorders of breast (N60-N64)                                                            | X |
| Inflammatory diseases of female pelvic organs (N70-N77)                                  | X |
| Noninflammatory disorders of female genital tract (N80-N98)                              | X |

194

195

Table S16: Inclusion and exclusion criteria for cluster 15. Female ratio: 45%, mean age of patients: 53, mortality: 0%.

|                                                                                          |   |
|------------------------------------------------------------------------------------------|---|
| Intestinal infectious diseases (A00-A09)                                                 | X |
| Infections with a predominantly sexual mode of transmission (A50-A64)                    | X |
| Viral infections characterized by skin and mucous membrane lesions (B00-B09)             | X |
| Malignant neoplasms (C00-C97)                                                            | X |
| Benign neoplasms (D10-D36)                                                               | X |
| Neoplasms of uncertain or unknown behaviour (D37-D48)                                    | X |
| Disorders of thyroid gland (E00-E07)                                                     | X |
| Metabolic disorders (E70-E90)                                                            | X |
| Mental and behavioural disorders due to psychoactive substance use (F10-F19)             | X |
| Schizophrenia, schizotypal and delusional disorders (F20-F29)                            | X |
| Mood [affective] disorders (F30-F39)                                                     | X |
| Neurotic, stress-related and somatoform disorders (F40-F48)                              | X |
| Episodic and paroxysmal disorders (G40-G47)                                              | X |
| Nerve, nerve root and plexus disorders (G50-G59)                                         | X |
| Disorders of eyelid, lacrimal system and orbit (H00-H06)                                 | X |
| Disorders of lens (H25-H28)                                                              | X |
| Disorders of ocular muscles, binocular movement, accommodation and refraction (H49-H52)  | X |
| Diseases of middle ear and mastoid (H65-H75)                                             | ✓ |
| Other disorders of ear (H90-H95)                                                         | X |
| Hypertensive diseases (I10-I15)                                                          | X |
| Other forms of heart disease (I30-I52)                                                   | X |
| Diseases of veins, lymphatic vessels and lymph nodes, not elsewhere classified (I80-I89) | X |
| Acute upper respiratory infections (J00-J06)                                             | X |
| Influenza and pneumonia (J09-J18)                                                        | X |
| Other acute lower respiratory infections (J20-J22)                                       | X |
| Other diseases of upper respiratory tract (J30-J39)                                      | X |
| Chronic lower respiratory diseases (J40-J47)                                             | X |
| Diseases of oral cavity, salivary glands and jaws (K00-K14)                              | X |
| Diseases of oesophagus, stomach and duodenum (K20-K31)                                   | X |
| Diseases of appendix (K35-K38)                                                           | X |
| Hernia (K40-K46)                                                                         | X |
| Noninfective enteritis and colitis (K50-K52)                                             | X |
| Other diseases of intestines (K55-K63)                                                   | X |
| Disorders of gallbladder, biliary tract and pancreas (K80-K87)                           | X |
| Infections of the skin and subcutaneous tissue (L00-L08)                                 | X |
| Disorders of skin appendages (L60-L75)                                                   | X |
| Arthropathies (M00-M25)                                                                  | X |
| Dorsopathies (M40-M54)                                                                   | X |
| Soft tissue disorders (M60-M79)                                                          | X |
| Osteopathies and chondropathies (M80-M94)                                                | X |
| Renal tubulo-interstitial diseases (N10-N16)                                             | X |
| Urolithiasis (N20-N23)                                                                   | X |
| Other diseases of urinary system (N30-N39)                                               | X |
| Diseases of male genital organs (N40-N51)                                                | X |
| Disorders of breast (N60-N64)                                                            | X |
| Inflammatory diseases of female pelvic organs (N70-N77)                                  | X |
| Noninflammatory disorders of female genital tract (N80-N98)                              | X |

196

197

Table S17: Inclusion and exclusion criteria for cluster 16. Female ratio: 45%, mean age of patients: 24, mortality: 0%.



|                                                                                          |   |
|------------------------------------------------------------------------------------------|---|
| Intestinal infectious diseases (A00-A09)                                                 | X |
| Infections with a predominantly sexual mode of transmission (A50-A64)                    | X |
| Viral infections characterized by skin and mucous membrane lesions (B00-B09)             | X |
| Malignant neoplasms (C00-C97)                                                            | X |
| Benign neoplasms (D10-D36)                                                               | X |
| Neoplasms of uncertain or unknown behaviour (D37-D48)                                    | X |
| Disorders of thyroid gland (E00-E07)                                                     | X |
| Metabolic disorders (E70-E90)                                                            | X |
| Mental and behavioural disorders due to psychoactive substance use (F10-F19)             | X |
| Schizophrenia, schizotypal and delusional disorders (F20-F29)                            | ✓ |
| Mood [affective] disorders (F30-F39)                                                     | X |
| Neurotic, stress-related and somatoform disorders (F40-F48)                              | X |
| Episodic and paroxysmal disorders (G40-G47)                                              | X |
| Nerve, nerve root and plexus disorders (G50-G59)                                         | X |
| Disorders of eyelid, lacrimal system and orbit (H00-H06)                                 | X |
| Disorders of lens (H25-H28)                                                              | X |
| Disorders of ocular muscles, binocular movement, accommodation and refraction (H49-H52)  | X |
| Other disorders of ear (H90-H95)                                                         | X |
| Hypertensive diseases (I10-I15)                                                          | X |
| Other forms of heart disease (I30-I52)                                                   | X |
| Diseases of veins, lymphatic vessels and lymph nodes, not elsewhere classified (I80-I89) | X |
| Acute upper respiratory infections (J00-J06)                                             | X |
| Influenza and pneumonia (J09-J18)                                                        | X |
| Other acute lower respiratory infections (J20-J22)                                       | X |
| Other diseases of upper respiratory tract (J30-J39)                                      | X |
| Chronic lower respiratory diseases (J40-J47)                                             | X |
| Diseases of oral cavity, salivary glands and jaws (K00-K14)                              | X |
| Diseases of oesophagus, stomach and duodenum (K20-K31)                                   | X |
| Diseases of appendix (K35-K38)                                                           | X |
| Hernia (K40-K46)                                                                         | X |
| Noninfective enteritis and colitis (K50-K52)                                             | X |
| Other diseases of intestines (K55-K63)                                                   | X |
| Disorders of gallbladder, biliary tract and pancreas (K80-K87)                           | X |
| Infections of the skin and subcutaneous tissue (L00-L08)                                 | X |
| Disorders of skin appendages (L60-L75)                                                   | X |
| Arthropathies (M00-M25)                                                                  | X |
| Dorsopathies (M40-M54)                                                                   | X |
| Soft tissue disorders (M60-M79)                                                          | X |
| Osteopathies and chondropathies (M80-M94)                                                | X |
| Renal tubulo-interstitial diseases (N10-N16)                                             | X |
| Urolithiasis (N20-N23)                                                                   | X |
| Other diseases of urinary system (N30-N39)                                               | X |
| Diseases of male genital organs (N40-N51)                                                | X |
| Disorders of breast (N60-N64)                                                            | X |
| Inflammatory diseases of female pelvic organs (N70-N77)                                  | X |
| Noninflammatory disorders of female genital tract (N80-N98)                              | X |

198

199

Table S18: Inclusion and exclusion criteria for cluster 17. Female ratio: 44%, mean age of patients: 41, mortality: 0%.

|                                                                                          |   |
|------------------------------------------------------------------------------------------|---|
| Intestinal infectious diseases (A00-A09)                                                 | X |
| Infections with a predominantly sexual mode of transmission (A50-A64)                    | ✓ |
| Viral infections characterized by skin and mucous membrane lesions (B00-B09)             | X |
| Malignant neoplasms (C00-C97)                                                            | X |
| Benign neoplasms (D10-D36)                                                               | X |
| Neoplasms of uncertain or unknown behaviour (D37-D48)                                    | X |
| Disorders of thyroid gland (E00-E07)                                                     | X |
| Metabolic disorders (E70-E90)                                                            | X |
| Mental and behavioural disorders due to psychoactive substance use (F10-F19)             | X |
| Mood [affective] disorders (F30-F39)                                                     | X |
| Neurotic, stress-related and somatoform disorders (F40-F48)                              | X |
| Episodic and paroxysmal disorders (G40-G47)                                              | X |
| Nerve, nerve root and plexus disorders (G50-G59)                                         | X |
| Disorders of eyelid, lacrimal system and orbit (H00-H06)                                 | X |
| Disorders of lens (H25-H28)                                                              | X |
| Disorders of ocular muscles, binocular movement, accommodation and refraction (H49-H52)  | X |
| Other disorders of ear (H90-H95)                                                         | X |
| Hypertensive diseases (I10-I15)                                                          | X |
| Other forms of heart disease (I30-I52)                                                   | X |
| Diseases of veins, lymphatic vessels and lymph nodes, not elsewhere classified (I80-I89) | X |
| Acute upper respiratory infections (J00-J06)                                             | X |
| Influenza and pneumonia (J09-J18)                                                        | X |
| Other acute lower respiratory infections (J20-J22)                                       | X |
| Other diseases of upper respiratory tract (J30-J39)                                      | X |
| Chronic lower respiratory diseases (J40-J47)                                             | X |
| Diseases of oral cavity, salivary glands and jaws (K00-K14)                              | X |
| Diseases of oesophagus, stomach and duodenum (K20-K31)                                   | X |
| Diseases of appendix (K35-K38)                                                           | X |
| Hernia (K40-K46)                                                                         | X |
| Noninfective enteritis and colitis (K50-K52)                                             | X |
| Other diseases of intestines (K55-K63)                                                   | X |
| Disorders of gallbladder, biliary tract and pancreas (K80-K87)                           | X |
| Infections of the skin and subcutaneous tissue (L00-L08)                                 | X |
| Disorders of skin appendages (L60-L75)                                                   | X |
| Arthropathies (M00-M25)                                                                  | X |
| Dorsopathies (M40-M54)                                                                   | X |
| Soft tissue disorders (M60-M79)                                                          | X |
| Osteopathies and chondropathies (M80-M94)                                                | X |
| Renal tubulo-interstitial diseases (N10-N16)                                             | X |
| Urolithiasis (N20-N23)                                                                   | X |
| Other diseases of urinary system (N30-N39)                                               | X |
| Diseases of male genital organs (N40-N51)                                                | X |
| Disorders of breast (N60-N64)                                                            | X |
| Inflammatory diseases of female pelvic organs (N70-N77)                                  | X |
| Noninflammatory disorders of female genital tract (N80-N98)                              | X |

201 Table S19: Inclusion and exclusion criteria for cluster 18. Female ratio: 73%, mean age of patients: 30, mortality: 0%.

|                                                                                          |   |
|------------------------------------------------------------------------------------------|---|
| Intestinal infectious diseases (A00-A09)                                                 | X |
| Viral infections characterized by skin and mucous membrane lesions (B00-B09)             | X |
| Malignant neoplasms (C00-C97)                                                            | X |
| Benign neoplasms (D10-D36)                                                               | X |
| Neoplasms of uncertain or unknown behaviour (D37-D48)                                    | X |
| Disorders of thyroid gland (E00-E07)                                                     | X |
| Metabolic disorders (E70-E90)                                                            | X |
| Mental and behavioural disorders due to psychoactive substance use (F10-F19)             | X |
| Mood [affective] disorders (F30-F39)                                                     | X |
| Neurotic, stress-related and somatoform disorders (F40-F48)                              | X |
| Episodic and paroxysmal disorders (G40-G47)                                              | X |
| Nerve, nerve root and plexus disorders (G50-G59)                                         | X |
| Disorders of eyelid, lacrimal system and orbit (H00-H06)                                 | X |
| Disorders of lens (H25-H28)                                                              | X |
| Disorders of ocular muscles, binocular movement, accommodation and refraction (H49-H52)  | ✓ |
| Other disorders of ear (H90-H95)                                                         | X |
| Hypertensive diseases (I10-I15)                                                          | X |
| Other forms of heart disease (I30-I52)                                                   | X |
| Diseases of veins, lymphatic vessels and lymph nodes, not elsewhere classified (I80-I89) | X |
| Acute upper respiratory infections (J00-J06)                                             | X |
| Influenza and pneumonia (J09-J18)                                                        | X |
| Other acute lower respiratory infections (J20-J22)                                       | X |
| Other diseases of upper respiratory tract (J30-J39)                                      | X |
| Chronic lower respiratory diseases (J40-J47)                                             | X |
| Diseases of oral cavity, salivary glands and jaws (K00-K14)                              | X |
| Diseases of oesophagus, stomach and duodenum (K20-K31)                                   | X |
| Diseases of appendix (K35-K38)                                                           | X |
| Hernia (K40-K46)                                                                         | X |
| Noninfective enteritis and colitis (K50-K52)                                             | X |
| Other diseases of intestines (K55-K63)                                                   | X |
| Disorders of gallbladder, biliary tract and pancreas (K80-K87)                           | X |
| Infections of the skin and subcutaneous tissue (L00-L08)                                 | X |
| Disorders of skin appendages (L60-L75)                                                   | X |
| Arthropathies (M00-M25)                                                                  | X |
| Dorsopathies (M40-M54)                                                                   | X |
| Soft tissue disorders (M60-M79)                                                          | X |
| Osteopathies and chondropathies (M80-M94)                                                | X |
| Renal tubulo-interstitial diseases (N10-N16)                                             | X |
| Urolithiasis (N20-N23)                                                                   | X |
| Other diseases of urinary system (N30-N39)                                               | X |
| Diseases of male genital organs (N40-N51)                                                | X |
| Disorders of breast (N60-N64)                                                            | X |
| Inflammatory diseases of female pelvic organs (N70-N77)                                  | X |
| Noninflammatory disorders of female genital tract (N80-N98)                              | X |

202

203

Table S20: Inclusion and exclusion criteria for cluster 19. Female ratio: 52%, mean age of patients: 28, mortality: 0%.

|                                                                                          |   |
|------------------------------------------------------------------------------------------|---|
| Intestinal infectious diseases (A00-A09)                                                 | X |
| Viral infections characterized by skin and mucous membrane lesions (B00-B09)             | X |
| Malignant neoplasms (C00-C97)                                                            | X |
| Benign neoplasms (D10-D36)                                                               | X |
| Neoplasms of uncertain or unknown behaviour (D37-D48)                                    | ✓ |
| Disorders of thyroid gland (E00-E07)                                                     | X |
| Metabolic disorders (E70-E90)                                                            | X |
| Mental and behavioural disorders due to psychoactive substance use (F10-F19)             | X |
| Mood [affective] disorders (F30-F39)                                                     | X |
| Neurotic, stress-related and somatoform disorders (F40-F48)                              | X |
| Episodic and paroxysmal disorders (G40-G47)                                              | X |
| Nerve, nerve root and plexus disorders (G50-G59)                                         | X |
| Disorders of eyelid, lacrimal system and orbit (H00-H06)                                 | X |
| Disorders of lens (H25-H28)                                                              | X |
| Other disorders of ear (H90-H95)                                                         | X |
| Hypertensive diseases (I10-I15)                                                          | X |
| Other forms of heart disease (I30-I52)                                                   | X |
| Diseases of veins, lymphatic vessels and lymph nodes, not elsewhere classified (I80-I89) | X |
| Acute upper respiratory infections (J00-J06)                                             | X |
| Influenza and pneumonia (J09-J18)                                                        | X |
| Other acute lower respiratory infections (J20-J22)                                       | X |
| Other diseases of upper respiratory tract (J30-J39)                                      | X |
| Chronic lower respiratory diseases (J40-J47)                                             | X |
| Diseases of oral cavity, salivary glands and jaws (K00-K14)                              | X |
| Diseases of oesophagus, stomach and duodenum (K20-K31)                                   | X |
| Diseases of appendix (K35-K38)                                                           | X |
| Hernia (K40-K46)                                                                         | X |
| Noninfective enteritis and colitis (K50-K52)                                             | X |
| Other diseases of intestines (K55-K63)                                                   | X |
| Disorders of gallbladder, biliary tract and pancreas (K80-K87)                           | X |
| Infections of the skin and subcutaneous tissue (L00-L08)                                 | X |
| Disorders of skin appendages (L60-L75)                                                   | X |
| Arthropathies (M00-M25)                                                                  | X |
| Dorsopathies (M40-M54)                                                                   | X |
| Soft tissue disorders (M60-M79)                                                          | X |
| Osteopathies and chondropathies (M80-M94)                                                | X |
| Renal tubulo-interstitial diseases (N10-N16)                                             | X |
| Urolithiasis (N20-N23)                                                                   | X |
| Other diseases of urinary system (N30-N39)                                               | X |
| Diseases of male genital organs (N40-N51)                                                | X |
| Disorders of breast (N60-N64)                                                            | X |
| Inflammatory diseases of female pelvic organs (N70-N77)                                  | X |
| Noninflammatory disorders of female genital tract (N80-N98)                              | X |

204

205

Table S21: Inclusion and exclusion criteria for cluster 20. Female ratio: 58%, mean age of patients: 46, mortality: 0%.

|                                                                                          |   |
|------------------------------------------------------------------------------------------|---|
| Intestinal infectious diseases (A00-A09)                                                 | X |
| Viral infections characterized by skin and mucous membrane lesions (B00-B09)             | X |
| Malignant neoplasms (C00-C97)                                                            | X |
| Benign neoplasms (D10-D36)                                                               | X |
| Disorders of thyroid gland (E00-E07)                                                     | X |
| Metabolic disorders (E70-E90)                                                            | X |
| Mental and behavioural disorders due to psychoactive substance use (F10-F19)             | X |
| Mood [affective] disorders (F30-F39)                                                     | X |
| Neurotic, stress-related and somatoform disorders (F40-F48)                              | X |
| Episodic and paroxysmal disorders (G40-G47)                                              | X |
| Nerve, nerve root and plexus disorders (G50-G59)                                         | X |
| Disorders of eyelid, lacrimal system and orbit (H00-H06)                                 | X |
| Disorders of lens (H25-H28)                                                              | X |
| Other disorders of ear (H90-H95)                                                         | X |
| Hypertensive diseases (I10-I15)                                                          | X |
| Other forms of heart disease (I30-I52)                                                   | X |
| Diseases of veins, lymphatic vessels and lymph nodes, not elsewhere classified (I80-I89) | X |
| Acute upper respiratory infections (J00-J06)                                             | X |
| Influenza and pneumonia (J09-J18)                                                        | X |
| Other acute lower respiratory infections (J20-J22)                                       | X |
| Other diseases of upper respiratory tract (J30-J39)                                      | X |
| Chronic lower respiratory diseases (J40-J47)                                             | X |
| Diseases of oral cavity, salivary glands and jaws (K00-K14)                              | X |
| Diseases of oesophagus, stomach and duodenum (K20-K31)                                   | X |
| Diseases of appendix (K35-K38)                                                           | X |
| Hernia (K40-K46)                                                                         | X |
| Noninfective enteritis and colitis (K50-K52)                                             | X |
| Other diseases of intestines (K55-K63)                                                   | X |
| Disorders of gallbladder, biliary tract and pancreas (K80-K87)                           | X |
| Infections of the skin and subcutaneous tissue (L00-L08)                                 | X |
| Disorders of skin appendages (L60-L75)                                                   | X |
| Arthropathies (M00-M25)                                                                  | X |
| Dorsopathies (M40-M54)                                                                   | X |
| Soft tissue disorders (M60-M79)                                                          | X |
| Osteopathies and chondropathies (M80-M94)                                                | X |
| Renal tubulo-interstitial diseases (N10-N16)                                             | X |
| Urolithiasis (N20-N23)                                                                   | X |
| Other diseases of urinary system (N30-N39)                                               | X |
| Diseases of male genital organs (N40-N51)                                                | X |
| Disorders of breast (N60-N64)                                                            | ✓ |
| Inflammatory diseases of female pelvic organs (N70-N77)                                  | X |
| Noninflammatory disorders of female genital tract (N80-N98)                              | X |

206

207

Table S22: Inclusion and exclusion criteria for cluster 21. Female ratio: 79%, mean age of patients: 37, mortality: 0%.

|                                                                                          |   |
|------------------------------------------------------------------------------------------|---|
| Intestinal infectious diseases (A00-A09)                                                 | X |
| Viral infections characterized by skin and mucous membrane lesions (B00-B09)             | X |
| Malignant neoplasms (C00-C97)                                                            | X |
| Benign neoplasms (D10-D36)                                                               | X |
| Disorders of thyroid gland (E00-E07)                                                     | X |
| Metabolic disorders (E70-E90)                                                            | X |
| Mental and behavioural disorders due to psychoactive substance use (F10-F19)             | X |
| Mood [affective] disorders (F30-F39)                                                     | X |
| Neurotic, stress-related and somatoform disorders (F40-F48)                              | X |
| Episodic and paroxysmal disorders (G40-G47)                                              | X |
| Nerve, nerve root and plexus disorders (G50-G59)                                         | X |
| Disorders of eyelid, lacrimal system and orbit (H00-H06)                                 | ✓ |
| Disorders of lens (H25-H28)                                                              | X |
| Other disorders of ear (H90-H95)                                                         | X |
| Hypertensive diseases (I10-I15)                                                          | X |
| Other forms of heart disease (I30-I52)                                                   | X |
| Diseases of veins, lymphatic vessels and lymph nodes, not elsewhere classified (I80-I89) | X |
| Acute upper respiratory infections (J00-J06)                                             | X |
| Influenza and pneumonia (J09-J18)                                                        | X |
| Other acute lower respiratory infections (J20-J22)                                       | X |
| Other diseases of upper respiratory tract (J30-J39)                                      | X |
| Chronic lower respiratory diseases (J40-J47)                                             | X |
| Diseases of oral cavity, salivary glands and jaws (K00-K14)                              | X |
| Diseases of oesophagus, stomach and duodenum (K20-K31)                                   | X |
| Diseases of appendix (K35-K38)                                                           | X |
| Hernia (K40-K46)                                                                         | X |
| Noninfective enteritis and colitis (K50-K52)                                             | X |
| Other diseases of intestines (K55-K63)                                                   | X |
| Disorders of gallbladder, biliary tract and pancreas (K80-K87)                           | X |
| Infections of the skin and subcutaneous tissue (L00-L08)                                 | X |
| Disorders of skin appendages (L60-L75)                                                   | X |
| Arthropathies (M00-M25)                                                                  | X |
| Dorsopathies (M40-M54)                                                                   | X |
| Soft tissue disorders (M60-M79)                                                          | X |
| Osteopathies and chondropathies (M80-M94)                                                | X |
| Renal tubulo-interstitial diseases (N10-N16)                                             | X |
| Urolithiasis (N20-N23)                                                                   | X |
| Other diseases of urinary system (N30-N39)                                               | X |
| Diseases of male genital organs (N40-N51)                                                | X |
| Inflammatory diseases of female pelvic organs (N70-N77)                                  | X |
| Noninflammatory disorders of female genital tract (N80-N98)                              | X |

208

209

Table S23: Inclusion and exclusion criteria for cluster 22. Female ratio: 60%, mean age of patients: 41, mortality: 0%.

|                                                                                          |   |
|------------------------------------------------------------------------------------------|---|
| Intestinal infectious diseases (A00-A09)                                                 | X |
| Viral infections characterized by skin and mucous membrane lesions (B00-B09)             | X |
| Malignant neoplasms (C00-C97)                                                            | X |
| Benign neoplasms (D10-D36)                                                               | X |
| Disorders of thyroid gland (E00-E07)                                                     | X |
| Metabolic disorders (E70-E90)                                                            | X |
| Mental and behavioural disorders due to psychoactive substance use (F10-F19)             | X |
| Mood [affective] disorders (F30-F39)                                                     | X |
| Neurotic, stress-related and somatoform disorders (F40-F48)                              | X |
| Episodic and paroxysmal disorders (G40-G47)                                              | X |
| Nerve, nerve root and plexus disorders (G50-G59)                                         | X |
| Disorders of lens (H25-H28)                                                              | X |
| Other disorders of ear (H90-H95)                                                         | X |
| Hypertensive diseases (I10-I15)                                                          | X |
| Other forms of heart disease (I30-I52)                                                   | X |
| Diseases of veins, lymphatic vessels and lymph nodes, not elsewhere classified (I80-I89) | X |
| Acute upper respiratory infections (J00-J06)                                             | X |
| Influenza and pneumonia (J09-J18)                                                        | X |
| Other acute lower respiratory infections (J20-J22)                                       | X |
| Other diseases of upper respiratory tract (J30-J39)                                      | X |
| Chronic lower respiratory diseases (J40-J47)                                             | X |
| Diseases of oral cavity, salivary glands and jaws (K00-K14)                              | X |
| Diseases of oesophagus, stomach and duodenum (K20-K31)                                   | X |
| Diseases of appendix (K35-K38)                                                           | X |
| Hernia (K40-K46)                                                                         | X |
| Noninfective enteritis and colitis (K50-K52)                                             | X |
| Other diseases of intestines (K55-K63)                                                   | X |
| Disorders of gallbladder, biliary tract and pancreas (K80-K87)                           | X |
| Infections of the skin and subcutaneous tissue (L00-L08)                                 | X |
| Disorders of skin appendages (L60-L75)                                                   | X |
| Arthropathies (M00-M25)                                                                  | X |
| Dorsopathies (M40-M54)                                                                   | X |
| Soft tissue disorders (M60-M79)                                                          | X |
| Osteopathies and chondropathies (M80-M94)                                                | X |
| Renal tubulo-interstitial diseases (N10-N16)                                             | ✓ |
| Urolithiasis (N20-N23)                                                                   | X |
| Other diseases of urinary system (N30-N39)                                               | X |
| Diseases of male genital organs (N40-N51)                                                | X |
| Inflammatory diseases of female pelvic organs (N70-N77)                                  | X |
| Noninflammatory disorders of female genital tract (N80-N98)                              | X |

210

211

Table S24: Inclusion and exclusion criteria for cluster 23. Female ratio: 75%, mean age of patients: 27, mortality: 0%.

|     |                                                                                          |   |
|-----|------------------------------------------------------------------------------------------|---|
|     | Intestinal infectious diseases (A00-A09)                                                 | X |
|     | Viral infections characterized by skin and mucous membrane lesions (B00-B09)             | X |
|     | Malignant neoplasms (C00-C97)                                                            | X |
|     | Benign neoplasms (D10-D36)                                                               | X |
|     | Disorders of thyroid gland (E00-E07)                                                     | X |
|     | Metabolic disorders (E70-E90)                                                            | X |
|     | Mental and behavioural disorders due to psychoactive substance use (F10-F19)             | X |
|     | Mood [affective] disorders (F30-F39)                                                     | X |
|     | Neurotic, stress-related and somatoform disorders (F40-F48)                              | X |
|     | Episodic and paroxysmal disorders (G40-G47)                                              | X |
|     | Nerve, nerve root and plexus disorders (G50-G59)                                         | X |
|     | Disorders of lens (H25-H28)                                                              | X |
|     | Other disorders of ear (H90-H95)                                                         | X |
|     | Hypertensive diseases (I10-I15)                                                          | X |
|     | Other forms of heart disease (I30-I52)                                                   | X |
|     | Diseases of veins, lymphatic vessels and lymph nodes, not elsewhere classified (I80-I89) | X |
|     | Acute upper respiratory infections (J00-J06)                                             | X |
|     | Influenza and pneumonia (J09-J18)                                                        | X |
|     | Other acute lower respiratory infections (J20-J22)                                       | X |
| 212 | Other diseases of upper respiratory tract (J30-J39)                                      | X |
|     | Chronic lower respiratory diseases (J40-J47)                                             | X |
|     | Diseases of oral cavity, salivary glands and jaws (K00-K14)                              | X |
|     | Diseases of oesophagus, stomach and duodenum (K20-K31)                                   | X |
|     | Diseases of appendix (K35-K38)                                                           | X |
|     | Hernia (K40-K46)                                                                         | X |
|     | Noninfective enteritis and colitis (K50-K52)                                             | X |
|     | Other diseases of intestines (K55-K63)                                                   | X |
|     | Disorders of gallbladder, biliary tract and pancreas (K80-K87)                           | X |
|     | Infections of the skin and subcutaneous tissue (L00-L08)                                 | X |
|     | Disorders of skin appendages (L60-L75)                                                   | X |
|     | Arthropathies (M00-M25)                                                                  | X |
|     | Dorsopathies (M40-M54)                                                                   | X |
|     | Soft tissue disorders (M60-M79)                                                          | X |
|     | Osteopathies and chondropathies (M80-M94)                                                | ✓ |
|     | Urolithiasis (N20-N23)                                                                   | X |
|     | Other diseases of urinary system (N30-N39)                                               | X |
|     | Diseases of male genital organs (N40-N51)                                                | X |
|     | Inflammatory diseases of female pelvic organs (N70-N77)                                  | X |
|     | Noninflammatory disorders of female genital tract (N80-N98)                              | X |

213 Table S25: Inclusion and exclusion criteria for cluster 24. Female ratio: 43%, mean age of patients: 43, mortality: 0%.



|                                                                                          |   |
|------------------------------------------------------------------------------------------|---|
| Intestinal infectious diseases (A00-A09)                                                 | X |
| Viral infections characterized by skin and mucous membrane lesions (B00-B09)             | ✓ |
| Malignant neoplasms (C00-C97)                                                            | X |
| Benign neoplasms (D10-D36)                                                               | X |
| Disorders of thyroid gland (E00-E07)                                                     | X |
| Metabolic disorders (E70-E90)                                                            | X |
| Mental and behavioural disorders due to psychoactive substance use (F10-F19)             | X |
| Mood [affective] disorders (F30-F39)                                                     | X |
| Neurotic, stress-related and somatoform disorders (F40-F48)                              | X |
| Episodic and paroxysmal disorders (G40-G47)                                              | X |
| Nerve, nerve root and plexus disorders (G50-G59)                                         | X |
| Disorders of lens (H25-H28)                                                              | X |
| Other disorders of ear (H90-H95)                                                         | X |
| Hypertensive diseases (I10-I15)                                                          | X |
| Other forms of heart disease (I30-I52)                                                   | X |
| Diseases of veins, lymphatic vessels and lymph nodes, not elsewhere classified (I80-I89) | X |
| Acute upper respiratory infections (J00-J06)                                             | X |
| Influenza and pneumonia (J09-J18)                                                        | X |
| Other acute lower respiratory infections (J20-J22)                                       | X |
| Other diseases of upper respiratory tract (J30-J39)                                      | X |
| Chronic lower respiratory diseases (J40-J47)                                             | X |
| Diseases of oral cavity, salivary glands and jaws (K00-K14)                              | X |
| Diseases of oesophagus, stomach and duodenum (K20-K31)                                   | X |
| Diseases of appendix (K35-K38)                                                           | X |
| Hernia (K40-K46)                                                                         | X |
| Noninfective enteritis and colitis (K50-K52)                                             | X |
| Other diseases of intestines (K55-K63)                                                   | X |
| Disorders of gallbladder, biliary tract and pancreas (K80-K87)                           | X |
| Infections of the skin and subcutaneous tissue (L00-L08)                                 | X |
| Disorders of skin appendages (L60-L75)                                                   | X |
| Arthropathies (M00-M25)                                                                  | X |
| Dorsopathies (M40-M54)                                                                   | X |
| Soft tissue disorders (M60-M79)                                                          | X |
| Urolithiasis (N20-N23)                                                                   | X |
| Other diseases of urinary system (N30-N39)                                               | X |
| Diseases of male genital organs (N40-N51)                                                | X |
| Inflammatory diseases of female pelvic organs (N70-N77)                                  | X |
| Noninflammatory disorders of female genital tract (N80-N98)                              | X |

214

215

Table S26: Inclusion and exclusion criteria for cluster 25. Female ratio: 54%, mean age of patients: 22, mortality: 0%.

|     |                                                                                          |   |
|-----|------------------------------------------------------------------------------------------|---|
|     | Intestinal infectious diseases (A00-A09)                                                 | X |
|     | Malignant neoplasms (C00-C97)                                                            | X |
|     | Benign neoplasms (D10-D36)                                                               | X |
|     | Disorders of thyroid gland (E00-E07)                                                     | X |
|     | Metabolic disorders (E70-E90)                                                            | ✓ |
|     | Mental and behavioural disorders due to psychoactive substance use (F10-F19)             | X |
|     | Mood [affective] disorders (F30-F39)                                                     | X |
|     | Neurotic, stress-related and somatoform disorders (F40-F48)                              | X |
|     | Episodic and paroxysmal disorders (G40-G47)                                              | X |
|     | Nerve, nerve root and plexus disorders (G50-G59)                                         | X |
|     | Disorders of lens (H25-H28)                                                              | X |
|     | Other disorders of ear (H90-H95)                                                         | X |
|     | Hypertensive diseases (I10-I15)                                                          | X |
|     | Other forms of heart disease (I30-I52)                                                   | X |
|     | Diseases of veins, lymphatic vessels and lymph nodes, not elsewhere classified (I80-I89) | X |
|     | Acute upper respiratory infections (J00-J06)                                             | X |
|     | Influenza and pneumonia (J09-J18)                                                        | X |
|     | Other acute lower respiratory infections (J20-J22)                                       | X |
| 216 | Other diseases of upper respiratory tract (J30-J39)                                      | X |
|     | Chronic lower respiratory diseases (J40-J47)                                             | X |
|     | Diseases of oral cavity, salivary glands and jaws (K00-K14)                              | X |
|     | Diseases of oesophagus, stomach and duodenum (K20-K31)                                   | X |
|     | Diseases of appendix (K35-K38)                                                           | X |
|     | Hernia (K40-K46)                                                                         | X |
|     | Noninfective enteritis and colitis (K50-K52)                                             | X |
|     | Other diseases of intestines (K55-K63)                                                   | X |
|     | Disorders of gallbladder, biliary tract and pancreas (K80-K87)                           | X |
|     | Infections of the skin and subcutaneous tissue (L00-L08)                                 | X |
|     | Disorders of skin appendages (L60-L75)                                                   | X |
|     | Arthropathies (M00-M25)                                                                  | X |
|     | Dorsopathies (M40-M54)                                                                   | X |
|     | Soft tissue disorders (M60-M79)                                                          | X |
|     | Urolithiasis (N20-N23)                                                                   | X |
|     | Other diseases of urinary system (N30-N39)                                               | X |
|     | Diseases of male genital organs (N40-N51)                                                | X |
|     | Inflammatory diseases of female pelvic organs (N70-N77)                                  | X |
|     | Noninflammatory disorders of female genital tract (N80-N98)                              | X |

217 Table S27: Inclusion and exclusion criteria for cluster 26. Female ratio: 44%, mean age of patients: 44, mortality: 0%.

|                                                                                          |   |
|------------------------------------------------------------------------------------------|---|
| Intestinal infectious diseases (A00-A09)                                                 | X |
| Malignant neoplasms (C00-C97)                                                            | X |
| Benign neoplasms (D10-D36)                                                               | X |
| Disorders of thyroid gland (E00-E07)                                                     | X |
| Mental and behavioural disorders due to psychoactive substance use (F10-F19)             | X |
| Mood [affective] disorders (F30-F39)                                                     | ✓ |
| Neurotic, stress-related and somatoform disorders (F40-F48)                              | X |
| Episodic and paroxysmal disorders (G40-G47)                                              | X |
| Nerve, nerve root and plexus disorders (G50-G59)                                         | X |
| Disorders of lens (H25-H28)                                                              | X |
| Other disorders of ear (H90-H95)                                                         | X |
| Hypertensive diseases (I10-I15)                                                          | X |
| Other forms of heart disease (I30-I52)                                                   | X |
| Diseases of veins, lymphatic vessels and lymph nodes, not elsewhere classified (I80-I89) | X |
| Acute upper respiratory infections (J00-J06)                                             | X |
| Influenza and pneumonia (J09-J18)                                                        | X |
| Other acute lower respiratory infections (J20-J22)                                       | X |
| Other diseases of upper respiratory tract (J30-J39)                                      | X |
| Chronic lower respiratory diseases (J40-J47)                                             | X |
| Diseases of oral cavity, salivary glands and jaws (K00-K14)                              | X |
| Diseases of oesophagus, stomach and duodenum (K20-K31)                                   | X |
| Diseases of appendix (K35-K38)                                                           | X |
| Hernia (K40-K46)                                                                         | X |
| Noninfective enteritis and colitis (K50-K52)                                             | X |
| Other diseases of intestines (K55-K63)                                                   | X |
| Disorders of gallbladder, biliary tract and pancreas (K80-K87)                           | X |
| Infections of the skin and subcutaneous tissue (L00-L08)                                 | X |
| Disorders of skin appendages (L60-L75)                                                   | X |
| Arthropathies (M00-M25)                                                                  | X |
| Dorsopathies (M40-M54)                                                                   | X |
| Soft tissue disorders (M60-M79)                                                          | X |
| Urolithiasis (N20-N23)                                                                   | X |
| Other diseases of urinary system (N30-N39)                                               | X |
| Diseases of male genital organs (N40-N51)                                                | X |
| Inflammatory diseases of female pelvic organs (N70-N77)                                  | X |
| Noninflammatory disorders of female genital tract (N80-N98)                              | X |

218

219

Table S28: Inclusion and exclusion criteria for cluster 27. Female ratio: 61%, mean age of patients: 42, mortality: 0%.

|                                                                                          |   |
|------------------------------------------------------------------------------------------|---|
| Intestinal infectious diseases (A00-A09)                                                 | X |
| Malignant neoplasms (C00-C97)                                                            | X |
| Benign neoplasms (D10-D36)                                                               | X |
| Disorders of thyroid gland (E00-E07)                                                     | X |
| Mental and behavioural disorders due to psychoactive substance use (F10-F19)             | X |
| Neurotic, stress-related and somatoform disorders (F40-F48)                              | X |
| Episodic and paroxysmal disorders (G40-G47)                                              | X |
| Nerve, nerve root and plexus disorders (G50-G59)                                         | X |
| Disorders of lens (H25-H28)                                                              | X |
| Other disorders of ear (H90-H95)                                                         | X |
| Hypertensive diseases (I10-I15)                                                          | X |
| Other forms of heart disease (I30-I52)                                                   | X |
| Diseases of veins, lymphatic vessels and lymph nodes, not elsewhere classified (I80-I89) | X |
| Acute upper respiratory infections (J00-J06)                                             | X |
| Influenza and pneumonia (J09-J18)                                                        | X |
| Other acute lower respiratory infections (J20-J22)                                       | X |
| Other diseases of upper respiratory tract (J30-J39)                                      | X |
| Chronic lower respiratory diseases (J40-J47)                                             | ✓ |
| Diseases of oral cavity, salivary glands and jaws (K00-K14)                              | X |
| Diseases of oesophagus, stomach and duodenum (K20-K31)                                   | X |
| Diseases of appendix (K35-K38)                                                           | X |
| Hernia (K40-K46)                                                                         | X |
| Noninfective enteritis and colitis (K50-K52)                                             | X |
| Other diseases of intestines (K55-K63)                                                   | X |
| Disorders of gallbladder, biliary tract and pancreas (K80-K87)                           | X |
| Infections of the skin and subcutaneous tissue (L00-L08)                                 | X |
| Disorders of skin appendages (L60-L75)                                                   | X |
| Arthropathies (M00-M25)                                                                  | X |
| Dorsopathies (M40-M54)                                                                   | X |
| Soft tissue disorders (M60-M79)                                                          | X |
| Urolithiasis (N20-N23)                                                                   | X |
| Other diseases of urinary system (N30-N39)                                               | X |
| Diseases of male genital organs (N40-N51)                                                | X |
| Inflammatory diseases of female pelvic organs (N70-N77)                                  | X |
| Noninflammatory disorders of female genital tract (N80-N98)                              | X |

220

221

Table S29: Inclusion and exclusion criteria for cluster 28. Female ratio: 44%, mean age of patients: 33, mortality: 0%.

|     |                                                                                          |   |
|-----|------------------------------------------------------------------------------------------|---|
|     | Intestinal infectious diseases (A00-A09)                                                 | X |
|     | Malignant neoplasms (C00-C97)                                                            | X |
|     | Benign neoplasms (D10-D36)                                                               | X |
|     | Disorders of thyroid gland (E00-E07)                                                     | X |
|     | Mental and behavioural disorders due to psychoactive substance use (F10-F19)             | X |
|     | Neurotic, stress-related and somatoform disorders (F40-F48)                              | X |
|     | Episodic and paroxysmal disorders (G40-G47)                                              | X |
|     | Nerve, nerve root and plexus disorders (G50-G59)                                         | X |
|     | Disorders of lens (H25-H28)                                                              | X |
|     | Other disorders of ear (H90-H95)                                                         | X |
|     | Hypertensive diseases (I10-I15)                                                          | X |
|     | Other forms of heart disease (I30-I52)                                                   | X |
|     | Diseases of veins, lymphatic vessels and lymph nodes, not elsewhere classified (I80-I89) | X |
|     | Acute upper respiratory infections (J00-J06)                                             | X |
|     | Influenza and pneumonia (J09-J18)                                                        | X |
|     | Other acute lower respiratory infections (J20-J22)                                       | X |
| 222 | Other diseases of upper respiratory tract (J30-J39)                                      | X |
|     | Diseases of oral cavity, salivary glands and jaws (K00-K14)                              | X |
|     | Diseases of oesophagus, stomach and duodenum (K20-K31)                                   | X |
|     | Diseases of appendix (K35-K38)                                                           | X |
|     | Hernia (K40-K46)                                                                         | X |
|     | Noninfective enteritis and colitis (K50-K52)                                             | X |
|     | Other diseases of intestines (K55-K63)                                                   | X |
|     | Disorders of gallbladder, biliary tract and pancreas (K80-K87)                           | X |
|     | Infections of the skin and subcutaneous tissue (L00-L08)                                 | X |
|     | Disorders of skin appendages (L60-L75)                                                   | X |
|     | Arthropathies (M00-M25)                                                                  | X |
|     | Dorsopathies (M40-M54)                                                                   | X |
|     | Soft tissue disorders (M60-M79)                                                          | X |
|     | Urolithiasis (N20-N23)                                                                   | X |
|     | Other diseases of urinary system (N30-N39)                                               | X |
|     | Diseases of male genital organs (N40-N51)                                                | X |
|     | Inflammatory diseases of female pelvic organs (N70-N77)                                  | ✓ |
|     | Noninflammatory disorders of female genital tract (N80-N98)                              | X |

223 Table S30: Inclusion and exclusion criteria for cluster 29. Female ratio: 100%, mean age of patients: 35, mortality: 0%.

|     |                                                                                          |   |
|-----|------------------------------------------------------------------------------------------|---|
|     | Intestinal infectious diseases (A00-A09)                                                 | X |
|     | Malignant neoplasms (C00-C97)                                                            | X |
|     | Benign neoplasms (D10-D36)                                                               | X |
|     | Disorders of thyroid gland (E00-E07)                                                     | X |
|     | Mental and behavioural disorders due to psychoactive substance use (F10-F19)             | X |
|     | Neurotic, stress-related and somatoform disorders (F40-F48)                              | X |
|     | Episodic and paroxysmal disorders (G40-G47)                                              | X |
|     | Nerve, nerve root and plexus disorders (G50-G59)                                         | X |
|     | Disorders of lens (H25-H28)                                                              | X |
|     | Other disorders of ear (H90-H95)                                                         | X |
|     | Hypertensive diseases (I10-I15)                                                          | X |
|     | Other forms of heart disease (I30-I52)                                                   | X |
|     | Diseases of veins, lymphatic vessels and lymph nodes, not elsewhere classified (I80-I89) | X |
|     | Acute upper respiratory infections (J00-J06)                                             | X |
|     | Influenza and pneumonia (J09-J18)                                                        | X |
|     | Other acute lower respiratory infections (J20-J22)                                       | X |
| 224 | Other diseases of upper respiratory tract (J30-J39)                                      | X |
|     | Diseases of oral cavity, salivary glands and jaws (K00-K14)                              | X |
|     | Diseases of oesophagus, stomach and duodenum (K20-K31)                                   | X |
|     | Diseases of appendix (K35-K38)                                                           | X |
|     | Hernia (K40-K46)                                                                         | X |
|     | Noninfective enteritis and colitis (K50-K52)                                             | X |
|     | Other diseases of intestines (K55-K63)                                                   | X |
|     | Disorders of gallbladder, biliary tract and pancreas (K80-K87)                           | X |
|     | Infections of the skin and subcutaneous tissue (L00-L08)                                 | X |
|     | Disorders of skin appendages (L60-L75)                                                   | ✓ |
|     | Arthropathies (M00-M25)                                                                  | X |
|     | Dorsopathies (M40-M54)                                                                   | X |
|     | Soft tissue disorders (M60-M79)                                                          | X |
|     | Urolithiasis (N20-N23)                                                                   | X |
|     | Other diseases of urinary system (N30-N39)                                               | X |
|     | Diseases of male genital organs (N40-N51)                                                | X |
|     | Noninflammatory disorders of female genital tract (N80-N98)                              | X |

225 Table S31: Inclusion and exclusion criteria for cluster 30. Female ratio: 38%, mean age of patients: 34, mortality: 0%.

|     |                                                                                          |   |
|-----|------------------------------------------------------------------------------------------|---|
|     | Intestinal infectious diseases (A00-A09)                                                 | X |
|     | Malignant neoplasms (C00-C97)                                                            | X |
|     | Benign neoplasms (D10-D36)                                                               | X |
|     | Disorders of thyroid gland (E00-E07)                                                     | X |
|     | Mental and behavioural disorders due to psychoactive substance use (F10-F19)             | X |
|     | Neurotic, stress-related and somatoform disorders (F40-F48)                              | X |
|     | Episodic and paroxysmal disorders (G40-G47)                                              | X |
|     | Nerve, nerve root and plexus disorders (G50-G59)                                         | X |
|     | Disorders of lens (H25-H28)                                                              | X |
|     | Other disorders of ear (H90-H95)                                                         | ✓ |
|     | Hypertensive diseases (I10-I15)                                                          | X |
|     | Other forms of heart disease (I30-I52)                                                   | X |
|     | Diseases of veins, lymphatic vessels and lymph nodes, not elsewhere classified (I80-I89) | X |
|     | Acute upper respiratory infections (J00-J06)                                             | X |
|     | Influenza and pneumonia (J09-J18)                                                        | X |
| 226 | Other acute lower respiratory infections (J20-J22)                                       | X |
|     | Other diseases of upper respiratory tract (J30-J39)                                      | X |
|     | Diseases of oral cavity, salivary glands and jaws (K00-K14)                              | X |
|     | Diseases of oesophagus, stomach and duodenum (K20-K31)                                   | X |
|     | Diseases of appendix (K35-K38)                                                           | X |
|     | Hernia (K40-K46)                                                                         | X |
|     | Noninfective enteritis and colitis (K50-K52)                                             | X |
|     | Other diseases of intestines (K55-K63)                                                   | X |
|     | Disorders of gallbladder, biliary tract and pancreas (K80-K87)                           | X |
|     | Infections of the skin and subcutaneous tissue (L00-L08)                                 | X |
|     | Arthropathies (M00-M25)                                                                  | X |
|     | Dorsopathies (M40-M54)                                                                   | X |
|     | Soft tissue disorders (M60-M79)                                                          | X |
|     | Urolithiasis (N20-N23)                                                                   | X |
|     | Other diseases of urinary system (N30-N39)                                               | X |
|     | Diseases of male genital organs (N40-N51)                                                | X |
|     | Noninflammatory disorders of female genital tract (N80-N98)                              | X |

227 Table S32: Inclusion and exclusion criteria for cluster 31. Female ratio: 43%, mean age of patients: 40, mortality: 0%.

|     |                                                                                          |   |
|-----|------------------------------------------------------------------------------------------|---|
|     | Intestinal infectious diseases (A00-A09)                                                 | X |
|     | Malignant neoplasms (C00-C97)                                                            | X |
|     | Benign neoplasms (D10-D36)                                                               | X |
|     | Disorders of thyroid gland (E00-E07)                                                     | ✓ |
|     | Mental and behavioural disorders due to psychoactive substance use (F10-F19)             | X |
|     | Neurotic, stress-related and somatoform disorders (F40-F48)                              | X |
|     | Episodic and paroxysmal disorders (G40-G47)                                              | X |
|     | Nerve, nerve root and plexus disorders (G50-G59)                                         | X |
|     | Disorders of lens (H25-H28)                                                              | X |
|     | Hypertensive diseases (I10-I15)                                                          | X |
|     | Other forms of heart disease (I30-I52)                                                   | X |
|     | Diseases of veins, lymphatic vessels and lymph nodes, not elsewhere classified (I80-I89) | X |
|     | Acute upper respiratory infections (J00-J06)                                             | X |
|     | Influenza and pneumonia (J09-J18)                                                        | X |
| 228 | Other acute lower respiratory infections (J20-J22)                                       | X |
|     | Other diseases of upper respiratory tract (J30-J39)                                      | X |
|     | Diseases of oral cavity, salivary glands and jaws (K00-K14)                              | X |
|     | Diseases of oesophagus, stomach and duodenum (K20-K31)                                   | X |
|     | Diseases of appendix (K35-K38)                                                           | X |
|     | Hernia (K40-K46)                                                                         | X |
|     | Noninfective enteritis and colitis (K50-K52)                                             | X |
|     | Other diseases of intestines (K55-K63)                                                   | X |
|     | Disorders of gallbladder, biliary tract and pancreas (K80-K87)                           | X |
|     | Infections of the skin and subcutaneous tissue (L00-L08)                                 | X |
|     | Arthropathies (M00-M25)                                                                  | X |
|     | Dorsopathies (M40-M54)                                                                   | X |
|     | Soft tissue disorders (M60-M79)                                                          | X |
|     | Urolithiasis (N20-N23)                                                                   | X |
|     | Other diseases of urinary system (N30-N39)                                               | X |
|     | Diseases of male genital organs (N40-N51)                                                | X |
|     | Noninflammatory disorders of female genital tract (N80-N98)                              | X |

229 Table S33: Inclusion and exclusion criteria for cluster 32. Female ratio: 78%, mean age of patients: 48, mortality: 0%.

|     |                                                                                          |   |
|-----|------------------------------------------------------------------------------------------|---|
|     | Intestinal infectious diseases (A00-A09)                                                 | X |
|     | Malignant neoplasms (C00-C97)                                                            | X |
|     | Benign neoplasms (D10-D36)                                                               | X |
|     | Mental and behavioural disorders due to psychoactive substance use (F10-F19)             | X |
|     | Neurotic, stress-related and somatoform disorders (F40-F48)                              | X |
|     | Episodic and paroxysmal disorders (G40-G47)                                              | X |
|     | Nerve, nerve root and plexus disorders (G50-G59)                                         | X |
|     | Disorders of lens (H25-H28)                                                              | X |
|     | Hypertensive diseases (I10-I15)                                                          | X |
|     | Other forms of heart disease (I30-I52)                                                   | X |
|     | Diseases of veins, lymphatic vessels and lymph nodes, not elsewhere classified (I80-I89) | X |
|     | Acute upper respiratory infections (J00-J06)                                             | X |
|     | Influenza and pneumonia (J09-J18)                                                        | X |
|     | Other acute lower respiratory infections (J20-J22)                                       | ✓ |
| 230 | Other diseases of upper respiratory tract (J30-J39)                                      | X |
|     | Diseases of oral cavity, salivary glands and jaws (K00-K14)                              | X |
|     | Diseases of oesophagus, stomach and duodenum (K20-K31)                                   | X |
|     | Diseases of appendix (K35-K38)                                                           | X |
|     | Hernia (K40-K46)                                                                         | X |
|     | Noninfective enteritis and colitis (K50-K52)                                             | X |
|     | Other diseases of intestines (K55-K63)                                                   | X |
|     | Disorders of gallbladder, biliary tract and pancreas (K80-K87)                           | X |
|     | Infections of the skin and subcutaneous tissue (L00-L08)                                 | X |
|     | Arthropathies (M00-M25)                                                                  | X |
|     | Dorsopathies (M40-M54)                                                                   | X |
|     | Soft tissue disorders (M60-M79)                                                          | X |
|     | Urolithiasis (N20-N23)                                                                   | X |
|     | Other diseases of urinary system (N30-N39)                                               | X |
|     | Diseases of male genital organs (N40-N51)                                                | X |
|     | Noninflammatory disorders of female genital tract (N80-N98)                              | X |

231 Table S34: Inclusion and exclusion criteria for cluster 33. Female ratio: 45%, mean age of patients: 14, mortality: 0%.

|     |                                                                                          |   |
|-----|------------------------------------------------------------------------------------------|---|
|     | Intestinal infectious diseases (A00-A09)                                                 | X |
|     | Malignant neoplasms (C00-C97)                                                            | X |
|     | Benign neoplasms (D10-D36)                                                               | X |
|     | Mental and behavioural disorders due to psychoactive substance use (F10-F19)             | X |
|     | Neurotic, stress-related and somatoform disorders (F40-F48)                              | X |
|     | Episodic and paroxysmal disorders (G40-G47)                                              | X |
|     | Nerve, nerve root and plexus disorders (G50-G59)                                         | ✓ |
|     | Disorders of lens (H25-H28)                                                              | X |
|     | Hypertensive diseases (I10-I15)                                                          | X |
|     | Other forms of heart disease (I30-I52)                                                   | X |
|     | Diseases of veins, lymphatic vessels and lymph nodes, not elsewhere classified (I80-I89) | X |
|     | Acute upper respiratory infections (J00-J06)                                             | X |
|     | Influenza and pneumonia (J09-J18)                                                        | X |
|     | Other diseases of upper respiratory tract (J30-J39)                                      | X |
| 232 | Diseases of oral cavity, salivary glands and jaws (K00-K14)                              | X |
|     | Diseases of oesophagus, stomach and duodenum (K20-K31)                                   | X |
|     | Diseases of appendix (K35-K38)                                                           | X |
|     | Hernia (K40-K46)                                                                         | X |
|     | Noninfective enteritis and colitis (K50-K52)                                             | X |
|     | Other diseases of intestines (K55-K63)                                                   | X |
|     | Disorders of gallbladder, biliary tract and pancreas (K80-K87)                           | X |
|     | Infections of the skin and subcutaneous tissue (L00-L08)                                 | X |
|     | Arthropathies (M00-M25)                                                                  | X |
|     | Dorsopathies (M40-M54)                                                                   | X |
|     | Soft tissue disorders (M60-M79)                                                          | X |
|     | Urolithiasis (N20-N23)                                                                   | X |
|     | Other diseases of urinary system (N30-N39)                                               | X |
|     | Diseases of male genital organs (N40-N51)                                                | X |
|     | Noninflammatory disorders of female genital tract (N80-N98)                              | X |

233 Table S35: Inclusion and exclusion criteria for cluster 34. Female ratio: 58%, mean age of patients: 45, mortality: 0%.

|     |                                                                                          |   |
|-----|------------------------------------------------------------------------------------------|---|
|     | Intestinal infectious diseases (A00-A09)                                                 | X |
|     | Malignant neoplasms (C00-C97)                                                            | X |
|     | Benign neoplasms (D10-D36)                                                               | X |
|     | Mental and behavioural disorders due to psychoactive substance use (F10-F19)             | X |
|     | Neurotic, stress-related and somatoform disorders (F40-F48)                              | X |
|     | Episodic and paroxysmal disorders (G40-G47)                                              | X |
|     | Disorders of lens (H25-H28)                                                              | X |
|     | Hypertensive diseases (I10-I15)                                                          | X |
|     | Other forms of heart disease (I30-I52)                                                   | X |
|     | Diseases of veins, lymphatic vessels and lymph nodes, not elsewhere classified (I80-I89) | X |
|     | Acute upper respiratory infections (J00-J06)                                             | X |
|     | Influenza and pneumonia (J09-J18)                                                        | X |
|     | Other diseases of upper respiratory tract (J30-J39)                                      | X |
| 234 | Diseases of oral cavity, salivary glands and jaws (K00-K14)                              | X |
|     | Diseases of oesophagus, stomach and duodenum (K20-K31)                                   | ✓ |
|     | Diseases of appendix (K35-K38)                                                           | X |
|     | Hernia (K40-K46)                                                                         | X |
|     | Noninfective enteritis and colitis (K50-K52)                                             | X |
|     | Other diseases of intestines (K55-K63)                                                   | X |
|     | Disorders of gallbladder, biliary tract and pancreas (K80-K87)                           | X |
|     | Infections of the skin and subcutaneous tissue (L00-L08)                                 | X |
|     | Arthropathies (M00-M25)                                                                  | X |
|     | Dorsopathies (M40-M54)                                                                   | X |
|     | Soft tissue disorders (M60-M79)                                                          | X |
|     | Urolithiasis (N20-N23)                                                                   | X |
|     | Other diseases of urinary system (N30-N39)                                               | X |
|     | Diseases of male genital organs (N40-N51)                                                | X |
|     | Noninflammatory disorders of female genital tract (N80-N98)                              | X |

235 Table S36: Inclusion and exclusion criteria for cluster 35. Female ratio: 48%, mean age of patients: 42, mortality: 0%.

|     |                                                                                          |   |
|-----|------------------------------------------------------------------------------------------|---|
|     | Intestinal infectious diseases (A00-A09)                                                 | X |
|     | Malignant neoplasms (C00-C97)                                                            | X |
|     | Benign neoplasms (D10-D36)                                                               | X |
|     | Mental and behavioural disorders due to psychoactive substance use (F10-F19)             | X |
|     | Neurotic, stress-related and somatoform disorders (F40-F48)                              | X |
|     | Episodic and paroxysmal disorders (G40-G47)                                              | X |
|     | Disorders of lens (H25-H28)                                                              | X |
|     | Hypertensive diseases (I10-I15)                                                          | X |
|     | Other forms of heart disease (I30-I52)                                                   | X |
|     | Diseases of veins, lymphatic vessels and lymph nodes, not elsewhere classified (I80-I89) | X |
|     | Acute upper respiratory infections (J00-J06)                                             | X |
|     | Influenza and pneumonia (J09-J18)                                                        | X |
|     | Other diseases of upper respiratory tract (J30-J39)                                      | X |
| 236 | Diseases of oral cavity, salivary glands and jaws (K00-K14)                              | X |
|     | Diseases of appendix (K35-K38)                                                           | X |
|     | Hernia (K40-K46)                                                                         | X |
|     | Noninfective enteritis and colitis (K50-K52)                                             | ✓ |
|     | Other diseases of intestines (K55-K63)                                                   | X |
|     | Disorders of gallbladder, biliary tract and pancreas (K80-K87)                           | X |
|     | Infections of the skin and subcutaneous tissue (L00-L08)                                 | X |
|     | Arthropathies (M00-M25)                                                                  | X |
|     | Dorsopathies (M40-M54)                                                                   | X |
|     | Soft tissue disorders (M60-M79)                                                          | X |
|     | Urolithiasis (N20-N23)                                                                   | X |
|     | Other diseases of urinary system (N30-N39)                                               | X |
|     | Diseases of male genital organs (N40-N51)                                                | X |
|     | Noninflammatory disorders of female genital tract (N80-N98)                              | X |

237 Table S37: Inclusion and exclusion criteria for cluster 36. Female ratio: 55%, mean age of patients: 30, mortality: 0%.



|     |                                                                                          |   |
|-----|------------------------------------------------------------------------------------------|---|
|     | Intestinal infectious diseases (A00-A09)                                                 | X |
|     | Malignant neoplasms (C00-C97)                                                            | X |
|     | Benign neoplasms (D10-D36)                                                               | X |
|     | Mental and behavioural disorders due to psychoactive substance use (F10-F19)             | X |
|     | Neurotic, stress-related and somatoform disorders (F40-F48)                              | X |
|     | Episodic and paroxysmal disorders (G40-G47)                                              | X |
|     | Disorders of lens (H25-H28)                                                              | X |
|     | Hypertensive diseases (I10-I15)                                                          | X |
|     | Other forms of heart disease (I30-I52)                                                   | X |
|     | Diseases of veins, lymphatic vessels and lymph nodes, not elsewhere classified (I80-I89) | X |
|     | Acute upper respiratory infections (J00-J06)                                             | X |
|     | Influenza and pneumonia (J09-J18)                                                        | ✓ |
| 238 | Other diseases of upper respiratory tract (J30-J39)                                      | X |
|     | Diseases of oral cavity, salivary glands and jaws (K00-K14)                              | X |
|     | Diseases of appendix (K35-K38)                                                           | X |
|     | Hernia (K40-K46)                                                                         | X |
|     | Other diseases of intestines (K55-K63)                                                   | X |
|     | Disorders of gallbladder, biliary tract and pancreas (K80-K87)                           | X |
|     | Infections of the skin and subcutaneous tissue (L00-L08)                                 | X |
|     | Arthropathies (M00-M25)                                                                  | X |
|     | Dorsopathies (M40-M54)                                                                   | X |
|     | Soft tissue disorders (M60-M79)                                                          | X |
|     | Urolithiasis (N20-N23)                                                                   | X |
|     | Other diseases of urinary system (N30-N39)                                               | X |
|     | Diseases of male genital organs (N40-N51)                                                | X |
|     | Noninflammatory disorders of female genital tract (N80-N98)                              | X |

239 Table S38: Inclusion and exclusion criteria for cluster 37. Female ratio: 47%, mean age of patients: 33, mortality: 1%.

|     |                                                                                          |   |
|-----|------------------------------------------------------------------------------------------|---|
|     | Intestinal infectious diseases (A00-A09)                                                 | X |
|     | Malignant neoplasms (C00-C97)                                                            | X |
|     | Benign neoplasms (D10-D36)                                                               | X |
|     | Mental and behavioural disorders due to psychoactive substance use (F10-F19)             | X |
|     | Neurotic, stress-related and somatoform disorders (F40-F48)                              | X |
|     | Episodic and paroxysmal disorders (G40-G47)                                              | X |
|     | Disorders of lens (H25-H28)                                                              | X |
|     | Hypertensive diseases (I10-I15)                                                          | X |
|     | Other forms of heart disease (I30-I52)                                                   | X |
|     | Diseases of veins, lymphatic vessels and lymph nodes, not elsewhere classified (I80-I89) | X |
|     | Acute upper respiratory infections (J00-J06)                                             | X |
|     | Other diseases of upper respiratory tract (J30-J39)                                      | X |
| 240 | Diseases of oral cavity, salivary glands and jaws (K00-K14)                              | X |
|     | Diseases of appendix (K35-K38)                                                           | X |
|     | Hernia (K40-K46)                                                                         | X |
|     | Other diseases of intestines (K55-K63)                                                   | X |
|     | Disorders of gallbladder, biliary tract and pancreas (K80-K87)                           | X |
|     | Infections of the skin and subcutaneous tissue (L00-L08)                                 | X |
|     | Arthropathies (M00-M25)                                                                  | X |
|     | Dorsopathies (M40-M54)                                                                   | X |
|     | Soft tissue disorders (M60-M79)                                                          | X |
|     | Urolithiasis (N20-N23)                                                                   | X |
|     | Other diseases of urinary system (N30-N39)                                               | ✓ |
|     | Diseases of male genital organs (N40-N51)                                                | X |
|     | Noninflammatory disorders of female genital tract (N80-N98)                              | X |

241 Table S39: Inclusion and exclusion criteria for cluster 38. Female ratio: 79%, mean age of patients: 37, mortality: 0%.

|     |                                                                                          |   |
|-----|------------------------------------------------------------------------------------------|---|
|     | Intestinal infectious diseases (A00-A09)                                                 | X |
|     | Malignant neoplasms (C00-C97)                                                            | X |
|     | Benign neoplasms (D10-D36)                                                               | X |
|     | Mental and behavioural disorders due to psychoactive substance use (F10-F19)             | X |
|     | Neurotic, stress-related and somatoform disorders (F40-F48)                              | X |
|     | Episodic and paroxysmal disorders (G40-G47)                                              | X |
|     | Disorders of lens (H25-H28)                                                              | X |
|     | Hypertensive diseases (I10-I15)                                                          | X |
|     | Other forms of heart disease (I30-I52)                                                   | X |
|     | Diseases of veins, lymphatic vessels and lymph nodes, not elsewhere classified (I80-I89) | X |
|     | Acute upper respiratory infections (J00-J06)                                             | X |
|     | Other diseases of upper respiratory tract (J30-J39)                                      | X |
| 242 | Diseases of oral cavity, salivary glands and jaws (K00-K14)                              | X |
|     | Diseases of appendix (K35-K38)                                                           | X |
|     | Hernia (K40-K46)                                                                         | X |
|     | Other diseases of intestines (K55-K63)                                                   | X |
|     | Disorders of gallbladder, biliary tract and pancreas (K80-K87)                           | X |
|     | Infections of the skin and subcutaneous tissue (L00-L08)                                 | X |
|     | Arthropathies (M00-M25)                                                                  | X |
|     | Dorsopathies (M40-M54)                                                                   | X |
|     | Soft tissue disorders (M60-M79)                                                          | X |
|     | Renal tubulo-interstitial diseases (N10-N16)                                             | X |
|     | Urolithiasis (N20-N23)                                                                   | ✓ |
|     | Diseases of male genital organs (N40-N51)                                                | X |
|     | Noninflammatory disorders of female genital tract (N80-N98)                              | X |

243 Table S40: Inclusion and exclusion criteria for cluster 39. Female ratio: 30%, mean age of patients: 44, mortality: 0%.

|     |                                                                                          |   |
|-----|------------------------------------------------------------------------------------------|---|
|     | Intestinal infectious diseases (A00-A09)                                                 | X |
|     | Malignant neoplasms (C00-C97)                                                            | X |
|     | Benign neoplasms (D10-D36)                                                               | X |
|     | Mental and behavioural disorders due to psychoactive substance use (F10-F19)             | X |
|     | Neurotic, stress-related and somatoform disorders (F40-F48)                              | X |
|     | Episodic and paroxysmal disorders (G40-G47)                                              | X |
|     | Disorders of lens (H25-H28)                                                              | X |
|     | Hypertensive diseases (I10-I15)                                                          | X |
|     | Other forms of heart disease (I30-I52)                                                   | X |
|     | Diseases of veins, lymphatic vessels and lymph nodes, not elsewhere classified (I80-I89) | X |
|     | Acute upper respiratory infections (J00-J06)                                             | X |
|     | Other diseases of upper respiratory tract (J30-J39)                                      | X |
| 244 | Diseases of oral cavity, salivary glands and jaws (K00-K14)                              | X |
|     | Diseases of appendix (K35-K38)                                                           | X |
|     | Hernia (K40-K46)                                                                         | X |
|     | Other diseases of intestines (K55-K63)                                                   | X |
|     | Disorders of gallbladder, biliary tract and pancreas (K80-K87)                           | X |
|     | Infections of the skin and subcutaneous tissue (L00-L08)                                 | X |
|     | Arthropathies (M00-M25)                                                                  | X |
|     | Dorsopathies (M40-M54)                                                                   | X |
|     | Soft tissue disorders (M60-M79)                                                          | X |
|     | Renal tubulo-interstitial diseases (N10-N16)                                             | ✓ |
|     | Urolithiasis (N20-N23)                                                                   | ✓ |
|     | Diseases of male genital organs (N40-N51)                                                | X |
|     | Noninflammatory disorders of female genital tract (N80-N98)                              | X |

245 Table S41: Inclusion and exclusion criteria for cluster 40. Female ratio: 34%, mean age of patients: 44, mortality: 0%.

|     |                                                                                          |   |
|-----|------------------------------------------------------------------------------------------|---|
|     | Intestinal infectious diseases (A00-A09)                                                 | X |
|     | Malignant neoplasms (C00-C97)                                                            | X |
|     | Benign neoplasms (D10-D36)                                                               | X |
|     | Mental and behavioural disorders due to psychoactive substance use (F10-F19)             | X |
|     | Neurotic, stress-related and somatoform disorders (F40-F48)                              | ✓ |
|     | Episodic and paroxysmal disorders (G40-G47)                                              | X |
|     | Disorders of lens (H25-H28)                                                              | X |
|     | Hypertensive diseases (I10-I15)                                                          | X |
|     | Other forms of heart disease (I30-I52)                                                   | X |
|     | Diseases of veins, lymphatic vessels and lymph nodes, not elsewhere classified (I80-I89) | X |
| 246 | Acute upper respiratory infections (J00-J06)                                             | X |
|     | Other diseases of upper respiratory tract (J30-J39)                                      | X |
|     | Diseases of oral cavity, salivary glands and jaws (K00-K14)                              | X |
|     | Diseases of appendix (K35-K38)                                                           | X |
|     | Hernia (K40-K46)                                                                         | X |
|     | Other diseases of intestines (K55-K63)                                                   | X |
|     | Disorders of gallbladder, biliary tract and pancreas (K80-K87)                           | X |
|     | Infections of the skin and subcutaneous tissue (L00-L08)                                 | X |
|     | Arthropathies (M00-M25)                                                                  | X |
|     | Dorsopathies (M40-M54)                                                                   | X |
|     | Soft tissue disorders (M60-M79)                                                          | X |
|     | Diseases of male genital organs (N40-N51)                                                | X |
|     | Noninflammatory disorders of female genital tract (N80-N98)                              | X |

247 Table S42: Inclusion and exclusion criteria for cluster 41. Female ratio: 60%, mean age of patients: 34, mortality: 0%.

|     |                                                                                          |   |
|-----|------------------------------------------------------------------------------------------|---|
|     | Intestinal infectious diseases (A00-A09)                                                 | X |
|     | Malignant neoplasms (C00-C97)                                                            | X |
|     | Benign neoplasms (D10-D36)                                                               | X |
|     | Mental and behavioural disorders due to psychoactive substance use (F10-F19)             | X |
|     | Episodic and paroxysmal disorders (G40-G47)                                              | X |
|     | Disorders of lens (H25-H28)                                                              | X |
|     | Hypertensive diseases (I10-I15)                                                          | X |
|     | Other forms of heart disease (I30-I52)                                                   | X |
|     | Diseases of veins, lymphatic vessels and lymph nodes, not elsewhere classified (I80-I89) | X |
| 248 | Acute upper respiratory infections (J00-J06)                                             | X |
|     | Other diseases of upper respiratory tract (J30-J39)                                      | X |
|     | Diseases of oral cavity, salivary glands and jaws (K00-K14)                              | X |
|     | Diseases of appendix (K35-K38)                                                           | X |
|     | Hernia (K40-K46)                                                                         | X |
|     | Other diseases of intestines (K55-K63)                                                   | X |
|     | Disorders of gallbladder, biliary tract and pancreas (K80-K87)                           | ✓ |
|     | Infections of the skin and subcutaneous tissue (L00-L08)                                 | X |
|     | Arthropathies (M00-M25)                                                                  | X |
|     | Dorsopathies (M40-M54)                                                                   | X |
|     | Soft tissue disorders (M60-M79)                                                          | X |
|     | Diseases of male genital organs (N40-N51)                                                | X |
|     | Noninflammatory disorders of female genital tract (N80-N98)                              | X |

249 Table S43: Inclusion and exclusion criteria for cluster 42. Female ratio: 65%, mean age of patients: 49, mortality: 0%.

|     |                                                                                          |   |
|-----|------------------------------------------------------------------------------------------|---|
|     | Intestinal infectious diseases (A00-A09)                                                 | X |
|     | Malignant neoplasms (C00-C97)                                                            | X |
|     | Benign neoplasms (D10-D36)                                                               | X |
|     | Mental and behavioural disorders due to psychoactive substance use (F10-F19)             | X |
|     | Episodic and paroxysmal disorders (G40-G47)                                              | X |
|     | Disorders of lens (H25-H28)                                                              | X |
|     | Hypertensive diseases (I10-I15)                                                          | X |
|     | Other forms of heart disease (I30-I52)                                                   | X |
|     | Diseases of veins, lymphatic vessels and lymph nodes, not elsewhere classified (I80-I89) | X |
| 250 | Acute upper respiratory infections (J00-J06)                                             | X |
|     | Other diseases of upper respiratory tract (J30-J39)                                      | X |
|     | Diseases of oral cavity, salivary glands and jaws (K00-K14)                              | X |
|     | Diseases of appendix (K35-K38)                                                           | X |
|     | Hernia (K40-K46)                                                                         | X |
|     | Other diseases of intestines (K55-K63)                                                   | X |
|     | Infections of the skin and subcutaneous tissue (L00-L08)                                 | ✓ |
|     | Arthropathies (M00-M25)                                                                  | X |
|     | Dorsopathies (M40-M54)                                                                   | X |
|     | Soft tissue disorders (M60-M79)                                                          | X |
|     | Diseases of male genital organs (N40-N51)                                                | X |
|     | Noninflammatory disorders of female genital tract (N80-N98)                              | X |

251 Table S44: Inclusion and exclusion criteria for cluster 43. Female ratio: 34%, mean age of patients: 31, mortality: 0%.

|     |                                                                                          |   |
|-----|------------------------------------------------------------------------------------------|---|
|     | Intestinal infectious diseases (A00-A09)                                                 | X |
|     | Malignant neoplasms (C00-C97)                                                            | X |
|     | Benign neoplasms (D10-D36)                                                               | X |
|     | Mental and behavioural disorders due to psychoactive substance use (F10-F19)             | X |
|     | Episodic and paroxysmal disorders (G40-G47)                                              | X |
|     | Disorders of lens (H25-H28)                                                              | ✓ |
|     | Disorders of choroid and retina (H30-H36)                                                | X |
|     | Hypertensive diseases (I10-I15)                                                          | X |
|     | Other forms of heart disease (I30-I52)                                                   | X |
|     | Diseases of veins, lymphatic vessels and lymph nodes, not elsewhere classified (I80-I89) | X |
| 252 | Acute upper respiratory infections (J00-J06)                                             | X |
|     | Other diseases of upper respiratory tract (J30-J39)                                      | X |
|     | Diseases of oral cavity, salivary glands and jaws (K00-K14)                              | X |
|     | Diseases of appendix (K35-K38)                                                           | X |
|     | Hernia (K40-K46)                                                                         | X |
|     | Other diseases of intestines (K55-K63)                                                   | X |
|     | Arthropathies (M00-M25)                                                                  | X |
|     | Dorsopathies (M40-M54)                                                                   | X |
|     | Soft tissue disorders (M60-M79)                                                          | X |
|     | Diseases of male genital organs (N40-N51)                                                | X |
|     | Noninflammatory disorders of female genital tract (N80-N98)                              | X |

253 Table S45: Inclusion and exclusion criteria for cluster 44. Female ratio: 58%, mean age of patients: 71, mortality: 0%.

|     |                                                                                          |   |
|-----|------------------------------------------------------------------------------------------|---|
|     | Intestinal infectious diseases (A00-A09)                                                 | X |
|     | Malignant neoplasms (C00-C97)                                                            | X |
|     | Benign neoplasms (D10-D36)                                                               | X |
|     | Mental and behavioural disorders due to psychoactive substance use (F10-F19)             | X |
|     | Episodic and paroxysmal disorders (G40-G47)                                              | X |
|     | Disorders of lens (H25-H28)                                                              | ✓ |
|     | Disorders of choroid and retina (H30-H36)                                                | ✓ |
|     | Hypertensive diseases (I10-I15)                                                          | X |
|     | Other forms of heart disease (I30-I52)                                                   | X |
|     | Diseases of veins, lymphatic vessels and lymph nodes, not elsewhere classified (I80-I89) | X |
| 254 | Acute upper respiratory infections (J00-J06)                                             | X |
|     | Other diseases of upper respiratory tract (J30-J39)                                      | X |
|     | Diseases of oral cavity, salivary glands and jaws (K00-K14)                              | X |
|     | Diseases of appendix (K35-K38)                                                           | X |
|     | Hernia (K40-K46)                                                                         | X |
|     | Other diseases of intestines (K55-K63)                                                   | X |
|     | Arthropathies (M00-M25)                                                                  | X |
|     | Dorsopathies (M40-M54)                                                                   | X |
|     | Soft tissue disorders (M60-M79)                                                          | X |
|     | Diseases of male genital organs (N40-N51)                                                | X |
|     | Noninflammatory disorders of female genital tract (N80-N98)                              | X |

255 Table S46: Inclusion and exclusion criteria for cluster 45. Female ratio: 57%, mean age of patients: 71, mortality: 0%.

|     |                                                                                          |   |
|-----|------------------------------------------------------------------------------------------|---|
|     | Intestinal infectious diseases (A00-A09)                                                 | X |
|     | Malignant neoplasms (C00-C97)                                                            | X |
|     | Benign neoplasms (D10-D36)                                                               | X |
|     | Mental and behavioural disorders due to psychoactive substance use (F10-F19)             | X |
|     | Episodic and paroxysmal disorders (G40-G47)                                              | X |
|     | Hypertensive diseases (I10-I15)                                                          | X |
|     | Other forms of heart disease (I30-I52)                                                   | X |
|     | Diseases of veins, lymphatic vessels and lymph nodes, not elsewhere classified (I80-I89) | X |
| 256 | Acute upper respiratory infections (J00-J06)                                             | X |
|     | Other diseases of upper respiratory tract (J30-J39)                                      | X |
|     | Diseases of oral cavity, salivary glands and jaws (K00-K14)                              | ✓ |
|     | Diseases of appendix (K35-K38)                                                           | X |
|     | Hernia (K40-K46)                                                                         | X |
|     | Other diseases of intestines (K55-K63)                                                   | X |
|     | Arthropathies (M00-M25)                                                                  | X |
|     | Dorsopathies (M40-M54)                                                                   | X |
|     | Soft tissue disorders (M60-M79)                                                          | X |
|     | Diseases of male genital organs (N40-N51)                                                | X |
|     | Noninflammatory disorders of female genital tract (N80-N98)                              | X |

257 Table S47: Inclusion and exclusion criteria for cluster 46. Female ratio: 52%, mean age of patients: 25, mortality: 0%.

|     |                                                                                          |   |
|-----|------------------------------------------------------------------------------------------|---|
|     | Intestinal infectious diseases (A00-A09)                                                 | X |
|     | Malignant neoplasms (C00-C97)                                                            | X |
|     | Benign neoplasms (D10-D36)                                                               | X |
|     | Mental and behavioural disorders due to psychoactive substance use (F10-F19)             | X |
|     | Episodic and paroxysmal disorders (G40-G47)                                              | X |
|     | Hypertensive diseases (I10-I15)                                                          | X |
|     | Ischaemic heart diseases (I20-I25)                                                       | X |
|     | Other forms of heart disease (I30-I52)                                                   | ✓ |
|     | Diseases of veins, lymphatic vessels and lymph nodes, not elsewhere classified (I80-I89) | X |
| 258 | Acute upper respiratory infections (J00-J06)                                             | X |
|     | Other diseases of upper respiratory tract (J30-J39)                                      | X |
|     | Diseases of appendix (K35-K38)                                                           | X |
|     | Hernia (K40-K46)                                                                         | X |
|     | Other diseases of intestines (K55-K63)                                                   | X |
|     | Arthropathies (M00-M25)                                                                  | X |
|     | Dorsopathies (M40-M54)                                                                   | X |
|     | Soft tissue disorders (M60-M79)                                                          | X |
|     | Diseases of male genital organs (N40-N51)                                                | X |
|     | Noninflammatory disorders of female genital tract (N80-N98)                              | X |

259 Table S48: Inclusion and exclusion criteria for cluster 47. Female ratio: 51%, mean age of patients: 61, mortality: 3%.

|     |                                                                                          |   |
|-----|------------------------------------------------------------------------------------------|---|
|     | Intestinal infectious diseases (A00-A09)                                                 | X |
|     | Malignant neoplasms (C00-C97)                                                            | X |
|     | Benign neoplasms (D10-D36)                                                               | X |
|     | Mental and behavioural disorders due to psychoactive substance use (F10-F19)             | X |
|     | Episodic and paroxysmal disorders (G40-G47)                                              | X |
|     | Hypertensive diseases (I10-I15)                                                          | X |
|     | Ischaemic heart diseases (I20-I25)                                                       | ✓ |
|     | Other forms of heart disease (I30-I52)                                                   | ✓ |
|     | Diseases of veins, lymphatic vessels and lymph nodes, not elsewhere classified (I80-I89) | X |
| 260 | Acute upper respiratory infections (J00-J06)                                             | X |
|     | Other diseases of upper respiratory tract (J30-J39)                                      | X |
|     | Diseases of appendix (K35-K38)                                                           | X |
|     | Hernia (K40-K46)                                                                         | X |
|     | Other diseases of intestines (K55-K63)                                                   | X |
|     | Arthropathies (M00-M25)                                                                  | X |
|     | Dorsopathies (M40-M54)                                                                   | X |
|     | Soft tissue disorders (M60-M79)                                                          | X |
|     | Diseases of male genital organs (N40-N51)                                                | X |
|     | Noninflammatory disorders of female genital tract (N80-N98)                              | X |

261 Table S49: Inclusion and exclusion criteria for cluster 48. Female ratio: 46%, mean age of patients: 76, mortality: 6%.

|     |                                                                                          |   |
|-----|------------------------------------------------------------------------------------------|---|
|     | Intestinal infectious diseases (A00-A09)                                                 | X |
|     | Malignant neoplasms (C00-C97)                                                            | X |
|     | Benign neoplasms (D10-D36)                                                               | X |
|     | Mental and behavioural disorders due to psychoactive substance use (F10-F19)             | X |
|     | Episodic and paroxysmal disorders (G40-G47)                                              | ✓ |
|     | Hypertensive diseases (I10-I15)                                                          | X |
|     | Diseases of veins, lymphatic vessels and lymph nodes, not elsewhere classified (I80-I89) | X |
|     | Acute upper respiratory infections (J00-J06)                                             | X |
| 262 | Other diseases of upper respiratory tract (J30-J39)                                      | X |
|     | Diseases of appendix (K35-K38)                                                           | X |
|     | Hernia (K40-K46)                                                                         | X |
|     | Other diseases of intestines (K55-K63)                                                   | X |
|     | Arthropathies (M00-M25)                                                                  | X |
|     | Dorsopathies (M40-M54)                                                                   | X |
|     | Soft tissue disorders (M60-M79)                                                          | X |
|     | Diseases of male genital organs (N40-N51)                                                | X |
|     | Noninflammatory disorders of female genital tract (N80-N98)                              | X |

263 Table S50: Inclusion and exclusion criteria for cluster 49. Female ratio: 46%, mean age of patients: 40, mortality: 0%.

|     |                                                                                          |   |
|-----|------------------------------------------------------------------------------------------|---|
|     | Intestinal infectious diseases (A00-A09)                                                 | X |
|     | Malignant neoplasms (C00-C97)                                                            | X |
|     | Benign neoplasms (D10-D36)                                                               | X |
|     | Mental and behavioural disorders due to psychoactive substance use (F10-F19)             | X |
|     | Hypertensive diseases (I10-I15)                                                          | X |
|     | Diseases of veins, lymphatic vessels and lymph nodes, not elsewhere classified (I80-I89) | X |
|     | Acute upper respiratory infections (J00-J06)                                             | X |
| 264 | Other diseases of upper respiratory tract (J30-J39)                                      | X |
|     | Diseases of appendix (K35-K38)                                                           | X |
|     | Hernia (K40-K46)                                                                         | X |
|     | Other diseases of intestines (K55-K63)                                                   | X |
|     | Arthropathies (M00-M25)                                                                  | X |
|     | Dorsopathies (M40-M54)                                                                   | X |
|     | Soft tissue disorders (M60-M79)                                                          | ✓ |
|     | Diseases of male genital organs (N40-N51)                                                | X |
|     | Noninflammatory disorders of female genital tract (N80-N98)                              | X |

265 Table S51: Inclusion and exclusion criteria for cluster 50. Female ratio: 45%, mean age of patients: 45, mortality: 0%.

|     |                                                                                          |   |
|-----|------------------------------------------------------------------------------------------|---|
|     | Intestinal infectious diseases (A00-A09)                                                 | X |
|     | Malignant neoplasms (C00-C97)                                                            | X |
|     | Benign neoplasms (D10-D36)                                                               | ✓ |
|     | Mental and behavioural disorders due to psychoactive substance use (F10-F19)             | X |
|     | Hypertensive diseases (I10-I15)                                                          | X |
|     | Diseases of veins, lymphatic vessels and lymph nodes, not elsewhere classified (I80-I89) | X |
|     | Acute upper respiratory infections (J00-J06)                                             | X |
| 266 | Other diseases of upper respiratory tract (J30-J39)                                      | X |
|     | Diseases of appendix (K35-K38)                                                           | X |
|     | Hernia (K40-K46)                                                                         | X |
|     | Other diseases of intestines (K55-K63)                                                   | X |
|     | Arthropathies (M00-M25)                                                                  | X |
|     | Dorsopathies (M40-M54)                                                                   | X |
|     | Diseases of male genital organs (N40-N51)                                                | X |
|     | Noninflammatory disorders of female genital tract (N80-N98)                              | X |

267 Table S52: Inclusion and exclusion criteria for cluster 51. Female ratio: 67%, mean age of patients: 42, mortality: 0%.

|     |                                                                                          |   |
|-----|------------------------------------------------------------------------------------------|---|
|     | Intestinal infectious diseases (A00-A09)                                                 | X |
|     | Malignant neoplasms (C00-C97)                                                            | X |
|     | Mental and behavioural disorders due to psychoactive substance use (F10-F19)             | X |
|     | Hypertensive diseases (I10-I15)                                                          | X |
|     | Diseases of veins, lymphatic vessels and lymph nodes, not elsewhere classified (I80-I89) | X |
|     | Acute upper respiratory infections (J00-J06)                                             | X |
| 268 | Other diseases of upper respiratory tract (J30-J39)                                      | X |
|     | Diseases of appendix (K35-K38)                                                           | ✓ |
|     | Hernia (K40-K46)                                                                         | X |
|     | Other diseases of intestines (K55-K63)                                                   | X |
|     | Arthropathies (M00-M25)                                                                  | X |
|     | Dorsopathies (M40-M54)                                                                   | X |
|     | Diseases of male genital organs (N40-N51)                                                | X |
|     | Noninflammatory disorders of female genital tract (N80-N98)                              | X |

269 Table S53: Inclusion and exclusion criteria for cluster 52. Female ratio: 52%, mean age of patients: 26, mortality: 0%.

|     |                                                                                          |   |
|-----|------------------------------------------------------------------------------------------|---|
|     | Intestinal infectious diseases (A00-A09)                                                 | X |
|     | Malignant neoplasms (C00-C97)                                                            | X |
|     | Mental and behavioural disorders due to psychoactive substance use (F10-F19)             | X |
|     | Hypertensive diseases (I10-I15)                                                          | X |
|     | Diseases of veins, lymphatic vessels and lymph nodes, not elsewhere classified (I80-I89) | X |
|     | Acute upper respiratory infections (J00-J06)                                             | ✓ |
|     | Other acute lower respiratory infections (J20-J22)                                       | X |
| 270 | Other diseases of upper respiratory tract (J30-J39)                                      | X |
|     | Hernia (K40-K46)                                                                         | X |
|     | Other diseases of intestines (K55-K63)                                                   | X |
|     | Arthropathies (M00-M25)                                                                  | X |
|     | Dorsopathies (M40-M54)                                                                   | X |
|     | Diseases of male genital organs (N40-N51)                                                | X |
|     | Noninflammatory disorders of female genital tract (N80-N98)                              | X |

271 Table S54: Inclusion and exclusion criteria for cluster 53. Female ratio: 50%, mean age of patients: 18, mortality: 0%.

|     |                                                                                          |   |
|-----|------------------------------------------------------------------------------------------|---|
|     | Intestinal infectious diseases (A00-A09)                                                 | X |
|     | Malignant neoplasms (C00-C97)                                                            | X |
|     | Mental and behavioural disorders due to psychoactive substance use (F10-F19)             | X |
|     | Hypertensive diseases (I10-I15)                                                          | X |
|     | Diseases of veins, lymphatic vessels and lymph nodes, not elsewhere classified (I80-I89) | X |
|     | Acute upper respiratory infections (J00-J06)                                             | ✓ |
|     | Other acute lower respiratory infections (J20-J22)                                       | ✓ |
| 272 | Other diseases of upper respiratory tract (J30-J39)                                      | X |
|     | Hernia (K40-K46)                                                                         | X |
|     | Other diseases of intestines (K55-K63)                                                   | X |
|     | Arthropathies (M00-M25)                                                                  | X |
|     | Dorsopathies (M40-M54)                                                                   | X |
|     | Diseases of male genital organs (N40-N51)                                                | X |
|     | Noninflammatory disorders of female genital tract (N80-N98)                              | X |

273 Table S55: Inclusion and exclusion criteria for cluster 54. Female ratio: 45%, mean age of patients: 10, mortality: 0%.

|     |                                                                                          |   |
|-----|------------------------------------------------------------------------------------------|---|
|     | Intestinal infectious diseases (A00-A09)                                                 | X |
|     | Malignant neoplasms (C00-C97)                                                            | ✓ |
|     | Neoplasms of uncertain or unknown behaviour (D37-D48)                                    | X |
|     | Mental and behavioural disorders due to psychoactive substance use (F10-F19)             | X |
|     | Hypertensive diseases (I10-I15)                                                          | X |
|     | Diseases of veins, lymphatic vessels and lymph nodes, not elsewhere classified (I80-I89) | X |
| 274 | Other diseases of upper respiratory tract (J30-J39)                                      | X |
|     | Hernia (K40-K46)                                                                         | X |
|     | Other diseases of intestines (K55-K63)                                                   | X |
|     | Arthropathies (M00-M25)                                                                  | X |
|     | Dorsopathies (M40-M54)                                                                   | X |
|     | Diseases of male genital organs (N40-N51)                                                | X |
|     | Noninflammatory disorders of female genital tract (N80-N98)                              | X |

275 Table S56: Inclusion and exclusion criteria for cluster 55. Female ratio: 51%, mean age of patients: 61, mortality: 3%.

|     |                                                                                          |   |
|-----|------------------------------------------------------------------------------------------|---|
|     | Intestinal infectious diseases (A00-A09)                                                 | X |
|     | Malignant neoplasms (C00-C97)                                                            | ✓ |
|     | Neoplasms of uncertain or unknown behaviour (D37-D48)                                    | ✓ |
|     | Mental and behavioural disorders due to psychoactive substance use (F10-F19)             | X |
|     | Hypertensive diseases (I10-I15)                                                          | X |
|     | Diseases of veins, lymphatic vessels and lymph nodes, not elsewhere classified (I80-I89) | X |
| 276 | Other diseases of upper respiratory tract (J30-J39)                                      | X |
|     | Hernia (K40-K46)                                                                         | X |
|     | Other diseases of intestines (K55-K63)                                                   | X |
|     | Arthropathies (M00-M25)                                                                  | X |
|     | Dorsopathies (M40-M54)                                                                   | X |
|     | Diseases of male genital organs (N40-N51)                                                | X |
|     | Noninflammatory disorders of female genital tract (N80-N98)                              | X |

277 Table S57: Inclusion and exclusion criteria for cluster 56. Female ratio: 47%, mean age of patients: 58, mortality: 4%.

|     |                                                                                          |   |
|-----|------------------------------------------------------------------------------------------|---|
|     | Intestinal infectious diseases (A00-A09)                                                 | X |
|     | Mental and behavioural disorders due to psychoactive substance use (F10-F19)             | X |
|     | Hypertensive diseases (I10-I15)                                                          | X |
|     | Diseases of veins, lymphatic vessels and lymph nodes, not elsewhere classified (I80-I89) | X |
|     | Other diseases of upper respiratory tract (J30-J39)                                      | X |
| 278 | Diseases of oesophagus, stomach and duodenum (K20-K31)                                   | X |
|     | Hernia (K40-K46)                                                                         | ✓ |
|     | Other diseases of intestines (K55-K63)                                                   | X |
|     | Arthropathies (M00-M25)                                                                  | X |
|     | Dorsopathies (M40-M54)                                                                   | X |
|     | Diseases of male genital organs (N40-N51)                                                | X |
|     | Noninflammatory disorders of female genital tract (N80-N98)                              | X |

279 Table S58: Inclusion and exclusion criteria for cluster 57. Female ratio: 24%, mean age of patients: 43, mortality: 0%.

|     |                                                                                          |   |
|-----|------------------------------------------------------------------------------------------|---|
|     | Intestinal infectious diseases (A00-A09)                                                 | X |
|     | Mental and behavioural disorders due to psychoactive substance use (F10-F19)             | X |
|     | Hypertensive diseases (I10-I15)                                                          | X |
|     | Diseases of veins, lymphatic vessels and lymph nodes, not elsewhere classified (I80-I89) | X |
|     | Other diseases of upper respiratory tract (J30-J39)                                      | X |
| 280 | Diseases of oesophagus, stomach and duodenum (K20-K31)                                   | ✓ |
|     | Hernia (K40-K46)                                                                         | ✓ |
|     | Other diseases of intestines (K55-K63)                                                   | X |
|     | Arthropathies (M00-M25)                                                                  | X |
|     | Dorsopathies (M40-M54)                                                                   | X |
|     | Diseases of male genital organs (N40-N51)                                                | X |
|     | Noninflammatory disorders of female genital tract (N80-N98)                              | X |

281 Table S59: Inclusion and exclusion criteria for cluster 58. Female ratio: 40%, mean age of patients: 51, mortality: 0%.

|     |                                                                                          |   |
|-----|------------------------------------------------------------------------------------------|---|
|     | Intestinal infectious diseases (A00-A09)                                                 | X |
|     | Mental and behavioural disorders due to psychoactive substance use (F10-F19)             | X |
|     | Hypertensive diseases (I10-I15)                                                          | X |
|     | Diseases of veins, lymphatic vessels and lymph nodes, not elsewhere classified (I80-I89) | X |
|     | Other diseases of upper respiratory tract (J30-J39)                                      | X |
| 282 | Other diseases of intestines (K55-K63)                                                   | X |
|     | Arthropathies (M00-M25)                                                                  | X |
|     | Dorsopathies (M40-M54)                                                                   | X |
|     | Other diseases of urinary system (N30-N39)                                               | X |
|     | Diseases of male genital organs (N40-N51)                                                | ✓ |
|     | Noninflammatory disorders of female genital tract (N80-N98)                              | X |

283 Table S60: Inclusion and exclusion criteria for cluster 59. Female ratio: 0%, mean age of patients: 30, mortality: 0%.



|     |                                                                                          |   |
|-----|------------------------------------------------------------------------------------------|---|
|     | Intestinal infectious diseases (A00-A09)                                                 | X |
|     | Mental and behavioural disorders due to psychoactive substance use (F10-F19)             | X |
|     | Hypertensive diseases (I10-I15)                                                          | X |
|     | Diseases of veins, lymphatic vessels and lymph nodes, not elsewhere classified (I80-I89) | X |
| 284 | Other diseases of upper respiratory tract (J30-J39)                                      | X |
|     | Other diseases of intestines (K55-K63)                                                   | X |
|     | Arthropathies (M00-M25)                                                                  | X |
|     | Dorsopathies (M40-M54)                                                                   | X |
|     | Other diseases of urinary system (N30-N39)                                               | ✓ |
|     | Diseases of male genital organs (N40-N51)                                                | ✓ |
|     | Noninflammatory disorders of female genital tract (N80-N98)                              | X |

285 Table S61: Inclusion and exclusion criteria for cluster 60. Female ratio: 0%, mean age of patients: 54, mortality: 1%.

|     |                                                                                          |   |
|-----|------------------------------------------------------------------------------------------|---|
|     | Intestinal infectious diseases (A00-A09)                                                 | X |
|     | Mental and behavioural disorders due to psychoactive substance use (F10-F19)             | X |
|     | Hypertensive diseases (I10-I15)                                                          | X |
|     | Diseases of veins, lymphatic vessels and lymph nodes, not elsewhere classified (I80-I89) | ✓ |
| 286 | Other diseases of upper respiratory tract (J30-J39)                                      | X |
|     | Diseases of oesophagus, stomach and duodenum (K20-K31)                                   | X |
|     | Other diseases of intestines (K55-K63)                                                   | X |
|     | Arthropathies (M00-M25)                                                                  | X |
|     | Dorsopathies (M40-M54)                                                                   | X |
|     | Noninflammatory disorders of female genital tract (N80-N98)                              | X |

287 Table S62: Inclusion and exclusion criteria for cluster 61. Female ratio: 55%, mean age of patients: 48, mortality: 0%.

|     |                                                                                          |   |
|-----|------------------------------------------------------------------------------------------|---|
|     | Intestinal infectious diseases (A00-A09)                                                 | X |
|     | Mental and behavioural disorders due to psychoactive substance use (F10-F19)             | X |
|     | Hypertensive diseases (I10-I15)                                                          | X |
|     | Diseases of veins, lymphatic vessels and lymph nodes, not elsewhere classified (I80-I89) | ✓ |
| 288 | Other diseases of upper respiratory tract (J30-J39)                                      | X |
|     | Diseases of oesophagus, stomach and duodenum (K20-K31)                                   | ✓ |
|     | Other diseases of intestines (K55-K63)                                                   | X |
|     | Arthropathies (M00-M25)                                                                  | X |
|     | Dorsopathies (M40-M54)                                                                   | X |
|     | Noninflammatory disorders of female genital tract (N80-N98)                              | X |

289 Table S63: Inclusion and exclusion criteria for cluster 62. Female ratio: 45%, mean age of patients: 57, mortality: 1%.

|     |                                                                              |   |
|-----|------------------------------------------------------------------------------|---|
|     | Intestinal infectious diseases (A00-A09)                                     | X |
|     | Metabolic disorders (E70-E90)                                                | X |
|     | Mental and behavioural disorders due to psychoactive substance use (F10-F19) | X |
|     | Mood [affective] disorders (F30-F39)                                         | X |
| 290 | Hypertensive diseases (I10-I15)                                              | X |
|     | Other diseases of upper respiratory tract (J30-J39)                          | X |
|     | Other diseases of intestines (K55-K63)                                       | X |
|     | Arthropathies (M00-M25)                                                      | X |
|     | Dorsopathies (M40-M54)                                                       | ✓ |
|     | Noninflammatory disorders of female genital tract (N80-N98)                  | X |

291 Table S64: Inclusion and exclusion criteria for cluster 63. Female ratio: 48%, mean age of patients: 48, mortality: 0%.

|     |                                                                              |   |
|-----|------------------------------------------------------------------------------|---|
|     | Intestinal infectious diseases (A00-A09)                                     | X |
|     | Metabolic disorders (E70-E90)                                                | X |
|     | Mental and behavioural disorders due to psychoactive substance use (F10-F19) | ✓ |
|     | Mood [affective] disorders (F30-F39)                                         | X |
|     | Neurotic, stress-related and somatoform disorders (F40-F48)                  | X |
| 292 | Hypertensive diseases (I10-I15)                                              | X |
|     | Other diseases of upper respiratory tract (J30-J39)                          | X |
|     | Chronic lower respiratory diseases (J40-J47)                                 | X |
|     | Other diseases of intestines (K55-K63)                                       | X |
|     | Diseases of liver (K70-K77)                                                  | X |
|     | Arthropathies (M00-M25)                                                      | X |
|     | Noninflammatory disorders of female genital tract (N80-N98)                  | X |

293 Table S65: Inclusion and exclusion criteria for cluster 64. Female ratio: 30%, mean age of patients: 37, mortality: 0%.

|     |                                                                              |   |
|-----|------------------------------------------------------------------------------|---|
|     | Intestinal infectious diseases (A00-A09)                                     | X |
|     | Metabolic disorders (E70-E90)                                                | X |
|     | Mental and behavioural disorders due to psychoactive substance use (F10-F19) | X |
|     | Mood [affective] disorders (F30-F39)                                         | ✓ |
| 294 | Hypertensive diseases (I10-I15)                                              | X |
|     | Other diseases of upper respiratory tract (J30-J39)                          | X |
|     | Other diseases of intestines (K55-K63)                                       | X |
|     | Arthropathies (M00-M25)                                                      | X |
|     | Dorsopathies (M40-M54)                                                       | ✓ |
|     | Noninflammatory disorders of female genital tract (N80-N98)                  | X |

295 Table S66: Inclusion and exclusion criteria for cluster 65. Female ratio: 70%, mean age of patients: 52, mortality: 0%.

|     |                                                                              |   |
|-----|------------------------------------------------------------------------------|---|
|     | Intestinal infectious diseases (A00-A09)                                     | X |
|     | Metabolic disorders (E70-E90)                                                | ✓ |
|     | Mental and behavioural disorders due to psychoactive substance use (F10-F19) | X |
|     | Hypertensive diseases (I10-I15)                                              | X |
| 296 | Other diseases of upper respiratory tract (J30-J39)                          | X |
|     | Other diseases of intestines (K55-K63)                                       | X |
|     | Arthropathies (M00-M25)                                                      | X |
|     | Dorsopathies (M40-M54)                                                       | ✓ |
|     | Noninflammatory disorders of female genital tract (N80-N98)                  | X |

297 Table S67: Inclusion and exclusion criteria for cluster 66. Female ratio: 45%, mean age of patients: 57, mortality: 1%.

|     |                                                                              |   |
|-----|------------------------------------------------------------------------------|---|
|     | Intestinal infectious diseases (A00-A09)                                     | X |
|     | Metabolic disorders (E70-E90)                                                | ✓ |
|     | Mental and behavioural disorders due to psychoactive substance use (F10-F19) | ✓ |
|     | Mood [affective] disorders (F30-F39)                                         | X |
|     | Neurotic, stress-related and somatoform disorders (F40-F48)                  | X |
| 298 | Hypertensive diseases (I10-I15)                                              | X |
|     | Other diseases of upper respiratory tract (J30-J39)                          | X |
|     | Chronic lower respiratory diseases (J40-J47)                                 | X |
|     | Other diseases of intestines (K55-K63)                                       | X |
|     | Diseases of liver (K70-K77)                                                  | X |
|     | Arthropathies (M00-M25)                                                      | X |
|     | Noninflammatory disorders of female genital tract (N80-N98)                  | X |

299 Table S68: Inclusion and exclusion criteria for cluster 67. Female ratio: 22%, mean age of patients: 50, mortality: 1%.

|     |                                                                              |   |
|-----|------------------------------------------------------------------------------|---|
|     | Intestinal infectious diseases (A00-A09)                                     | X |
|     | Mental and behavioural disorders due to psychoactive substance use (F10-F19) | ✓ |
|     | Mood [affective] disorders (F30-F39)                                         | X |
|     | Neurotic, stress-related and somatoform disorders (F40-F48)                  | X |
|     | Hypertensive diseases (I10-I15)                                              | X |
| 300 | Other diseases of upper respiratory tract (J30-J39)                          | X |
|     | Chronic lower respiratory diseases (J40-J47)                                 | ✓ |
|     | Other diseases of intestines (K55-K63)                                       | X |
|     | Diseases of liver (K70-K77)                                                  | X |
|     | Arthropathies (M00-M25)                                                      | X |
|     | Noninflammatory disorders of female genital tract (N80-N98)                  | X |

301 Table S69: Inclusion and exclusion criteria for cluster 68. Female ratio: 28%, mean age of patients: 55, mortality: 2%.

|     |                                                                              |   |
|-----|------------------------------------------------------------------------------|---|
|     | Intestinal infectious diseases (A00-A09)                                     | X |
|     | Mental and behavioural disorders due to psychoactive substance use (F10-F19) | ✓ |
|     | Mood [affective] disorders (F30-F39)                                         | X |
|     | Neurotic, stress-related and somatoform disorders (F40-F48)                  | ✓ |
| 302 | Hypertensive diseases (I10-I15)                                              | X |
|     | Other diseases of upper respiratory tract (J30-J39)                          | X |
|     | Other diseases of intestines (K55-K63)                                       | X |
|     | Diseases of liver (K70-K77)                                                  | X |
|     | Arthropathies (M00-M25)                                                      | X |
|     | Noninflammatory disorders of female genital tract (N80-N98)                  | X |

303 Table S70: Inclusion and exclusion criteria for cluster 69. Female ratio: 40%, mean age of patients: 36, mortality: 0%.

|     |                                                                              |   |
|-----|------------------------------------------------------------------------------|---|
|     | Intestinal infectious diseases (A00-A09)                                     | X |
|     | Mental and behavioural disorders due to psychoactive substance use (F10-F19) | ✓ |
|     | Mood [affective] disorders (F30-F39)                                         | X |
|     | Hypertensive diseases (I10-I15)                                              | X |
| 304 | Other diseases of upper respiratory tract (J30-J39)                          | X |
|     | Other diseases of intestines (K55-K63)                                       | X |
|     | Diseases of liver (K70-K77)                                                  | ✓ |
|     | Arthropathies (M00-M25)                                                      | X |
|     | Noninflammatory disorders of female genital tract (N80-N98)                  | X |

305 Table S71: Inclusion and exclusion criteria for cluster 70. Female ratio: 18%, mean age of patients: 52, mortality: 2%.

|     |                                                                              |   |
|-----|------------------------------------------------------------------------------|---|
|     | Intestinal infectious diseases (A00-A09)                                     | X |
|     | Mental and behavioural disorders due to psychoactive substance use (F10-F19) | ✓ |
|     | Mood [affective] disorders (F30-F39)                                         | ✓ |
|     | Hypertensive diseases (I10-I15)                                              | X |
| 306 | Other diseases of upper respiratory tract (J30-J39)                          | X |
|     | Other diseases of intestines (K55-K63)                                       | X |
|     | Arthropathies (M00-M25)                                                      | X |
|     | Noninflammatory disorders of female genital tract (N80-N98)                  | X |

307 Table S72: Inclusion and exclusion criteria for cluster 71. Female ratio: 41%, mean age of patients: 43, mortality: 0%.

|     |                                                                                          |   |
|-----|------------------------------------------------------------------------------------------|---|
|     | Intestinal infectious diseases (A00-A09)                                                 | X |
|     | Malignant neoplasms (C00-C97)                                                            | X |
|     | Hypertensive diseases (I10-I15)                                                          | X |
|     | Diseases of veins, lymphatic vessels and lymph nodes, not elsewhere classified (I80-I89) | X |
|     | Other diseases of upper respiratory tract (J30-J39)                                      | X |
| 308 | Diseases of oesophagus, stomach and duodenum (K20-K31)                                   | X |
|     | Hernia (K40-K46)                                                                         | X |
|     | Other diseases of intestines (K55-K63)                                                   | ✓ |
|     | Arthropathies (M00-M25)                                                                  | X |
|     | Noninflammatory disorders of female genital tract (N80-N98)                              | X |

309 Table S73: Inclusion and exclusion criteria for cluster 72. Female ratio: 47%, mean age of patients: 45, mortality: 0%.

|     |                                                                                          |   |
|-----|------------------------------------------------------------------------------------------|---|
|     | Intestinal infectious diseases (A00-A09)                                                 | X |
|     | Malignant neoplasms (C00-C97)                                                            | X |
|     | Hypertensive diseases (I10-I15)                                                          | X |
|     | Diseases of veins, lymphatic vessels and lymph nodes, not elsewhere classified (I80-I89) | X |
|     | Other diseases of upper respiratory tract (J30-J39)                                      | X |
| 310 | Diseases of oesophagus, stomach and duodenum (K20-K31)                                   | X |
|     | Hernia (K40-K46)                                                                         | ✓ |
|     | Other diseases of intestines (K55-K63)                                                   | ✓ |
|     | Arthropathies (M00-M25)                                                                  | X |
|     | Noninflammatory disorders of female genital tract (N80-N98)                              | X |

311 Table S74: Inclusion and exclusion criteria for cluster 73. Female ratio: 29%, mean age of patients: 58, mortality: 1%.

|     |                                                                                          |   |
|-----|------------------------------------------------------------------------------------------|---|
|     | Intestinal infectious diseases (A00-A09)                                                 | X |
|     | Malignant neoplasms (C00-C97)                                                            | ✓ |
|     | Hypertensive diseases (I10-I15)                                                          | X |
|     | Diseases of veins, lymphatic vessels and lymph nodes, not elsewhere classified (I80-I89) | X |
| 312 | Other diseases of upper respiratory tract (J30-J39)                                      | X |
|     | Diseases of oesophagus, stomach and duodenum (K20-K31)                                   | X |
|     | Other diseases of intestines (K55-K63)                                                   | ✓ |
|     | Arthropathies (M00-M25)                                                                  | X |
|     | Noninflammatory disorders of female genital tract (N80-N98)                              | X |

313 Table S75: Inclusion and exclusion criteria for cluster 74. Female ratio: 42%, mean age of patients: 68, mortality: 5%.

|     |                                                                                          |   |
|-----|------------------------------------------------------------------------------------------|---|
|     | Intestinal infectious diseases (A00-A09)                                                 | X |
|     | Hypertensive diseases (I10-I15)                                                          | X |
|     | Diseases of veins, lymphatic vessels and lymph nodes, not elsewhere classified (I80-I89) | ✓ |
| 314 | Other diseases of upper respiratory tract (J30-J39)                                      | X |
|     | Diseases of oesophagus, stomach and duodenum (K20-K31)                                   | X |
|     | Other diseases of intestines (K55-K63)                                                   | ✓ |
|     | Arthropathies (M00-M25)                                                                  | X |
|     | Noninflammatory disorders of female genital tract (N80-N98)                              | X |

315 Table S76: Inclusion and exclusion criteria for cluster 75. Female ratio: 44%, mean age of patients: 55, mortality: 1%.

|     |                                                             |   |
|-----|-------------------------------------------------------------|---|
|     | Intestinal infectious diseases (A00-A09)                    | X |
|     | Hypertensive diseases (I10-I15)                             | X |
|     | Other diseases of upper respiratory tract (J30-J39)         | X |
| 316 | Diseases of oesophagus, stomach and duodenum (K20-K31)      | ✓ |
|     | Other diseases of intestines (K55-K63)                      | ✓ |
|     | Arthropathies (M00-M25)                                     | X |
|     | Noninflammatory disorders of female genital tract (N80-N98) | X |

317 Table S77: Inclusion and exclusion criteria for cluster 76. Female ratio: 42%, mean age of patients: 59, mortality: 1%.

|     |                                                             |   |
|-----|-------------------------------------------------------------|---|
|     | Intestinal infectious diseases (A00-A09)                    | ✓ |
|     | Metabolic disorders (E70-E90)                               | X |
|     | Hypertensive diseases (I10-I15)                             | X |
| 318 | Acute upper respiratory infections (J00-J06)                | X |
|     | Other acute lower respiratory infections (J20-J22)          | X |
|     | Other diseases of upper respiratory tract (J30-J39)         | X |
|     | Arthropathies (M00-M25)                                     | X |
|     | Noninflammatory disorders of female genital tract (N80-N98) | X |

319 Table S78: Inclusion and exclusion criteria for cluster 77. Female ratio: 52%, mean age of patients: 21, mortality: 0%.

|     |                                                             |   |
|-----|-------------------------------------------------------------|---|
|     | Intestinal infectious diseases (A00-A09)                    | ✓ |
|     | Metabolic disorders (E70-E90)                               | X |
|     | Hypertensive diseases (I10-I15)                             | X |
| 320 | Acute upper respiratory infections (J00-J06)                | X |
|     | Other acute lower respiratory infections (J20-J22)          | ✓ |
|     | Other diseases of upper respiratory tract (J30-J39)         | X |
|     | Arthropathies (M00-M25)                                     | X |
|     | Noninflammatory disorders of female genital tract (N80-N98) | X |

321 Table S79: Inclusion and exclusion criteria for cluster 78. Female ratio: 42%, mean age of patients: 10, mortality: 0%.

|     |                                                             |   |
|-----|-------------------------------------------------------------|---|
|     | Intestinal infectious diseases (A00-A09)                    | ✓ |
|     | Metabolic disorders (E70-E90)                               | ✓ |
|     | Hypertensive diseases (I10-I15)                             | X |
| 322 | Acute upper respiratory infections (J00-J06)                | X |
|     | Other diseases of upper respiratory tract (J30-J39)         | X |
|     | Arthropathies (M00-M25)                                     | X |
|     | Noninflammatory disorders of female genital tract (N80-N98) | X |

323 Table S80: Inclusion and exclusion criteria for cluster 79. Female ratio: 51%, mean age of patients: 22, mortality: 1%.

|     |                                                             |   |
|-----|-------------------------------------------------------------|---|
|     | Intestinal infectious diseases (A00-A09)                    | ✓ |
|     | Hypertensive diseases (I10-I15)                             | X |
| 324 | Acute upper respiratory infections (J00-J06)                | ✓ |
|     | Other diseases of upper respiratory tract (J30-J39)         | X |
|     | Arthropathies (M00-M25)                                     | X |
|     | Noninflammatory disorders of female genital tract (N80-N98) | X |

325 Table S81: Inclusion and exclusion criteria for cluster 80. Female ratio: 46%, mean age of patients: 9, mortality: 0%.

|     |                                                             |   |
|-----|-------------------------------------------------------------|---|
|     | Benign neoplasms (D10-D36)                                  | X |
|     | Hypertensive diseases (I10-I15)                             | X |
|     | Other diseases of upper respiratory tract (J30-J39)         | X |
| 326 | Arthropathies (M00-M25)                                     | X |
|     | Other diseases of urinary system (N30-N39)                  | X |
|     | Inflammatory diseases of female pelvic organs (N70-N77)     | X |
|     | Noninflammatory disorders of female genital tract (N80-N98) | ✓ |

327 Table S82: Inclusion and exclusion criteria for cluster 81. Female ratio: 100%, mean age of patients: 43, mortality: 0%.

|     |                                                             |   |
|-----|-------------------------------------------------------------|---|
|     | Benign neoplasms (D10-D36)                                  | X |
|     | Hypertensive diseases (I10-I15)                             | X |
|     | Other diseases of upper respiratory tract (J30-J39)         | X |
| 328 | Arthropathies (M00-M25)                                     | X |
|     | Other diseases of urinary system (N30-N39)                  | ✓ |
|     | Inflammatory diseases of female pelvic organs (N70-N77)     | X |
|     | Noninflammatory disorders of female genital tract (N80-N98) | ✓ |

329 Table S83: Inclusion and exclusion criteria for cluster 82. Female ratio: 100%, mean age of patients: 51, mortality: 1%.

|     |                                                             |   |
|-----|-------------------------------------------------------------|---|
|     | Benign neoplasms (D10-D36)                                  | X |
|     | Hypertensive diseases (I10-I15)                             | X |
|     | Other diseases of upper respiratory tract (J30-J39)         | X |
| 330 | Arthropathies (M00-M25)                                     | X |
|     | Inflammatory diseases of female pelvic organs (N70-N77)     | ✓ |
|     | Noninflammatory disorders of female genital tract (N80-N98) | ✓ |

331 Table S84: Inclusion and exclusion criteria for cluster 83. Female ratio: 100%, mean age of patients: 39, mortality: 0%.

|     |                                                             |   |
|-----|-------------------------------------------------------------|---|
|     | Benign neoplasms (D10-D36)                                  | ✓ |
|     | Hypertensive diseases (I10-I15)                             | X |
| 332 | Other diseases of upper respiratory tract (J30-J39)         | X |
|     | Arthropathies (M00-M25)                                     | X |
|     | Noninflammatory disorders of female genital tract (N80-N98) | ✓ |

333 Table S85: Inclusion and exclusion criteria for cluster 84. Female ratio: 100%, mean age of patients: 48, mortality: 0%.

|     |                                                                                          |   |
|-----|------------------------------------------------------------------------------------------|---|
|     | Metabolic disorders (E70-E90)                                                            | X |
|     | Hypertensive diseases (I10-I15)                                                          | X |
|     | Diseases of veins, lymphatic vessels and lymph nodes, not elsewhere classified (I80-I89) | X |
| 334 | Other diseases of upper respiratory tract (J30-J39)                                      | X |
|     | Arthropathies (M00-M25)                                                                  | ✓ |
|     | Dorsopathies (M40-M54)                                                                   | X |
|     | Soft tissue disorders (M60-M79)                                                          | X |
|     | Osteopathies and chondropathies (M80-M94)                                                | X |

335 Table S86: Inclusion and exclusion criteria for cluster 85. Female ratio: 47%, mean age of patients: 50, mortality: 0%.

|     |                                                                                          |   |
|-----|------------------------------------------------------------------------------------------|---|
|     | Metabolic disorders (E70-E90)                                                            | ✓ |
|     | Hypertensive diseases (I10-I15)                                                          | X |
|     | Diseases of veins, lymphatic vessels and lymph nodes, not elsewhere classified (I80-I89) | X |
| 336 | Other diseases of upper respiratory tract (J30-J39)                                      | X |
|     | Arthropathies (M00-M25)                                                                  | ✓ |
|     | Dorsopathies (M40-M54)                                                                   | X |
|     | Soft tissue disorders (M60-M79)                                                          | X |
|     | Osteopathies and chondropathies (M80-M94)                                                | X |

337 Table S87: Inclusion and exclusion criteria for cluster 86. Female ratio: 43%, mean age of patients: 61, mortality: 1%.

|     |                                                                                          |   |
|-----|------------------------------------------------------------------------------------------|---|
|     | Hypertensive diseases (I10-I15)                                                          | X |
|     | Diseases of veins, lymphatic vessels and lymph nodes, not elsewhere classified (I80-I89) | ✓ |
|     | Other diseases of upper respiratory tract (J30-J39)                                      | X |
| 338 | Arthropathies (M00-M25)                                                                  | ✓ |
|     | Dorsopathies (M40-M54)                                                                   | X |
|     | Soft tissue disorders (M60-M79)                                                          | X |
|     | Osteopathies and chondropathies (M80-M94)                                                | X |

339 Table S88: Inclusion and exclusion criteria for cluster 87. Female ratio: 57%, mean age of patients: 59, mortality: 1%.

|     |                                                     |   |
|-----|-----------------------------------------------------|---|
|     | Hypertensive diseases (I10-I15)                     | X |
|     | Other diseases of upper respiratory tract (J30-J39) | X |
| 340 | Arthropathies (M00-M25)                             | ✓ |
|     | Dorsopathies (M40-M54)                              | ✓ |
|     | Soft tissue disorders (M60-M79)                     | X |
|     | Osteopathies and chondropathies (M80-M94)           | X |

341 Table S89: Inclusion and exclusion criteria for cluster 88. Female ratio: 54%, mean age of patients: 59, mortality: 0%.

|     |                                                     |   |
|-----|-----------------------------------------------------|---|
|     | Hypertensive diseases (I10-I15)                     | X |
|     | Other diseases of upper respiratory tract (J30-J39) | X |
| 342 | Arthropathies (M00-M25)                             | ✓ |
|     | Soft tissue disorders (M60-M79)                     | ✓ |
|     | Osteopathies and chondropathies (M80-M94)           | X |

343 Table S90: Inclusion and exclusion criteria for cluster 89. Female ratio: 47%, mean age of patients: 52, mortality: 0%.

|     |                                                     |   |
|-----|-----------------------------------------------------|---|
|     | Hypertensive diseases (I10-I15)                     | X |
|     | Other diseases of upper respiratory tract (J30-J39) | X |
| 344 | Arthropathies (M00-M25)                             | ✓ |
|     | Soft tissue disorders (M60-M79)                     | X |
|     | Osteopathies and chondropathies (M80-M94)           | ✓ |

345 Table S91: Inclusion and exclusion criteria for cluster 90. Female ratio: 55%, mean age of patients: 57, mortality: 1%.

|     |                                                     |   |
|-----|-----------------------------------------------------|---|
|     | Hypertensive diseases (I10-I15)                     | X |
|     | Other diseases of upper respiratory tract (J30-J39) | X |
| 346 | Arthropathies (M00-M25)                             | ✓ |
|     | Soft tissue disorders (M60-M79)                     | ✓ |
|     | Osteopathies and chondropathies (M80-M94)           | ✓ |

347 Table S92: Inclusion and exclusion criteria for cluster 91. Female ratio: 52%, mean age of patients: 56, mortality: 0%.

|     |                                                                               |   |
|-----|-------------------------------------------------------------------------------|---|
|     | Intestinal infectious diseases (A00-A09)                                      | X |
|     | Benign neoplasms (D10-D36)                                                    | X |
|     | Episodic and paroxysmal disorders (G40-G47)                                   | X |
|     | Diseases of middle ear and mastoid (H65-H75)                                  | X |
| 348 | Hypertensive diseases (I10-I15)                                               | X |
|     | Acute upper respiratory infections (J00-J06)                                  | X |
|     | Other diseases of upper respiratory tract (J30-J39)                           | ✓ |
|     | Chronic lower respiratory diseases (J40-J47)                                  | X |
|     | Diseases of oral cavity, salivary glands and jaws (K00-K14)                   | X |
|     | Other disorders of the musculoskeletal system and connective tissue (M95-M99) | X |

349 Table S93: Inclusion and exclusion criteria for cluster 92. Female ratio: 46%, mean age of patients: 27, mortality: 0%.

|     |                                                                               |   |
|-----|-------------------------------------------------------------------------------|---|
|     | Intestinal infectious diseases (A00-A09)                                      | X |
|     | Benign neoplasms (D10-D36)                                                    | ✓ |
|     | Episodic and paroxysmal disorders (G40-G47)                                   | X |
|     | Diseases of middle ear and mastoid (H65-H75)                                  | X |
| 350 | Hypertensive diseases (I10-I15)                                               | X |
|     | Acute upper respiratory infections (J00-J06)                                  | X |
|     | Other diseases of upper respiratory tract (J30-J39)                           | ✓ |
|     | Chronic lower respiratory diseases (J40-J47)                                  | X |
|     | Diseases of oral cavity, salivary glands and jaws (K00-K14)                   | X |
|     | Other disorders of the musculoskeletal system and connective tissue (M95-M99) | X |

351 Table S94: Inclusion and exclusion criteria for cluster 93. Female ratio: 57%, mean age of patients: 40, mortality: 0%.

|     |                                                                               |   |
|-----|-------------------------------------------------------------------------------|---|
|     | Intestinal infectious diseases (A00-A09)                                      | X |
|     | Episodic and paroxysmal disorders (G40-G47)                                   | X |
|     | Diseases of middle ear and mastoid (H65-H75)                                  | X |
|     | Hypertensive diseases (I10-I15)                                               | X |
| 352 | Acute upper respiratory infections (J00-J06)                                  | X |
|     | Other diseases of upper respiratory tract (J30-J39)                           | ✓ |
|     | Chronic lower respiratory diseases (J40-J47)                                  | X |
|     | Diseases of oral cavity, salivary glands and jaws (K00-K14)                   | ✓ |
|     | Other disorders of the musculoskeletal system and connective tissue (M95-M99) | X |

353 Table S95: Inclusion and exclusion criteria for cluster 94. Female ratio: 47%, mean age of patients: 28, mortality: 0%.

|     |                                                                               |   |
|-----|-------------------------------------------------------------------------------|---|
|     | Intestinal infectious diseases (A00-A09)                                      | ✓ |
|     | Episodic and paroxysmal disorders (G40-G47)                                   | X |
|     | Diseases of middle ear and mastoid (H65-H75)                                  | X |
| 354 | Hypertensive diseases (I10-I15)                                               | X |
|     | Acute upper respiratory infections (J00-J06)                                  | X |
|     | Other diseases of upper respiratory tract (J30-J39)                           | ✓ |
|     | Chronic lower respiratory diseases (J40-J47)                                  | X |
|     | Other disorders of the musculoskeletal system and connective tissue (M95-M99) | X |

355 Table S96: Inclusion and exclusion criteria for cluster 95. Female ratio: 48%, mean age of patients: 16, mortality: 0%.

|     |                                                                               |   |
|-----|-------------------------------------------------------------------------------|---|
|     | Episodic and paroxysmal disorders (G40-G47)                                   | X |
|     | Diseases of middle ear and mastoid (H65-H75)                                  | X |
|     | Hypertensive diseases (I10-I15)                                               | X |
| 356 | Acute upper respiratory infections (J00-J06)                                  | X |
|     | Other diseases of upper respiratory tract (J30-J39)                           | ✓ |
|     | Chronic lower respiratory diseases (J40-J47)                                  | ✓ |
|     | Other disorders of the musculoskeletal system and connective tissue (M95-M99) | X |

357 Table S97: Inclusion and exclusion criteria for cluster 96. Female ratio: 41%, mean age of patients: 34, mortality: 1%.

|     |                                                                               |   |
|-----|-------------------------------------------------------------------------------|---|
|     | Episodic and paroxysmal disorders (G40-G47)                                   | X |
|     | Diseases of middle ear and mastoid (H65-H75)                                  | X |
| 358 | Hypertensive diseases (I10-I15)                                               | X |
|     | Acute upper respiratory infections (J00-J06)                                  | X |
|     | Other diseases of upper respiratory tract (J30-J39)                           | ✓ |
|     | Other disorders of the musculoskeletal system and connective tissue (M95-M99) | ✓ |

359 Table S98: Inclusion and exclusion criteria for cluster 97. Female ratio: 43%, mean age of patients: 34, mortality: 0%.

|     |                                                     |   |
|-----|-----------------------------------------------------|---|
|     | Episodic and paroxysmal disorders (G40-G47)         | ✓ |
|     | Diseases of middle ear and mastoid (H65-H75)        | X |
| 360 | Hypertensive diseases (I10-I15)                     | X |
|     | Acute upper respiratory infections (J00-J06)        | X |
|     | Other diseases of upper respiratory tract (J30-J39) | ✓ |

361 Table S99: Inclusion and exclusion criteria for cluster 98. Female ratio: 34%, mean age of patients: 38, mortality: 0%.

|     |                                                     |   |
|-----|-----------------------------------------------------|---|
|     | Diseases of middle ear and mastoid (H65-H75)        | ✓ |
| 362 | Hypertensive diseases (I10-I15)                     | ✗ |
|     | Acute upper respiratory infections (J00-J06)        | ✗ |
|     | Other diseases of upper respiratory tract (J30-J39) | ✓ |

363 Table S100: Inclusion and exclusion criteria for cluster 99. Female ratio: 42%, mean age of patients: 10, mortality: 0%.

|     |                                                     |   |
|-----|-----------------------------------------------------|---|
|     | Diseases of middle ear and mastoid (H65-H75)        | ✗ |
| 364 | Hypertensive diseases (I10-I15)                     | ✗ |
|     | Acute upper respiratory infections (J00-J06)        | ✓ |
|     | Other diseases of upper respiratory tract (J30-J39) | ✓ |

365 Table S101: Inclusion and exclusion criteria for cluster 100. Female ratio: 45%, mean age of patients: 21, mortality: 0%.

|     |                                                     |   |
|-----|-----------------------------------------------------|---|
|     | Diseases of middle ear and mastoid (H65-H75)        | ✓ |
| 366 | Hypertensive diseases (I10-I15)                     | ✗ |
|     | Acute upper respiratory infections (J00-J06)        | ✓ |
|     | Other diseases of upper respiratory tract (J30-J39) | ✓ |

367 Table S102: Inclusion and exclusion criteria for cluster 101. Female ratio: 37%, mean age of patients: 9, mortality: 0%.

|     |                                                        |   |
|-----|--------------------------------------------------------|---|
|     | Malignant neoplasms (C00-C97)                          | ✗ |
|     | Diabetes mellitus (E10-E14)                            | ✗ |
|     | Obesity and other hyperalimentionation (E65-E68)       | ✗ |
|     | Metabolic disorders (E70-E90)                          | ✗ |
|     | Disorders of lens (H25-H28)                            | ✗ |
| 368 | Hypertensive diseases (I10-I15)                        | ✓ |
|     | Ischaemic heart diseases (I20-I25)                     | ✗ |
|     | Other forms of heart disease (I30-I52)                 | ✗ |
|     | Cerebrovascular diseases (I60-I69)                     | ✗ |
|     | Diseases of oesophagus, stomach and duodenum (K20-K31) | ✗ |
|     | Arthropathies (M00-M25)                                | ✗ |
|     | Dorsopathies (M40-M54)                                 | ✗ |

369 Table S103: Inclusion and exclusion criteria for cluster 102. Female ratio: 53%, mean age of patients: 61, mortality: 0%.

|     |                                                        |   |
|-----|--------------------------------------------------------|---|
|     | Malignant neoplasms (C00-C97)                          | ✗ |
|     | Diabetes mellitus (E10-E14)                            | ✗ |
|     | Obesity and other hyperalimentionation (E65-E68)       | ✗ |
|     | Metabolic disorders (E70-E90)                          | ✗ |
|     | Disorders of lens (H25-H28)                            | ✓ |
| 370 | Hypertensive diseases (I10-I15)                        | ✓ |
|     | Ischaemic heart diseases (I20-I25)                     | ✗ |
|     | Other forms of heart disease (I30-I52)                 | ✗ |
|     | Cerebrovascular diseases (I60-I69)                     | ✗ |
|     | Diseases of oesophagus, stomach and duodenum (K20-K31) | ✗ |
|     | Arthropathies (M00-M25)                                | ✗ |
|     | Dorsopathies (M40-M54)                                 | ✗ |

371 Table S104: Inclusion and exclusion criteria for cluster 103. Female ratio: 65%, mean age of patients: 77, mortality: 0%.

|     |                                                        |   |
|-----|--------------------------------------------------------|---|
|     | Malignant neoplasms (C00-C97)                          | ✗ |
|     | Diabetes mellitus (E10-E14)                            | ✗ |
|     | Obesity and other hyperalimentionation (E65-E68)       | ✗ |
|     | Metabolic disorders (E70-E90)                          | ✗ |
| 372 | Hypertensive diseases (I10-I15)                        | ✓ |
|     | Ischaemic heart diseases (I20-I25)                     | ✗ |
|     | Other forms of heart disease (I30-I52)                 | ✗ |
|     | Cerebrovascular diseases (I60-I69)                     | ✗ |
|     | Diseases of oesophagus, stomach and duodenum (K20-K31) | ✓ |
|     | Arthropathies (M00-M25)                                | ✗ |
|     | Dorsopathies (M40-M54)                                 | ✗ |

373 Table S105: Inclusion and exclusion criteria for cluster 104. Female ratio: 52%, mean age of patients: 64, mortality: 0%.



|     |                                                                                                                           |   |
|-----|---------------------------------------------------------------------------------------------------------------------------|---|
|     | Malignant neoplasms (C00-C97)                                                                                             | X |
|     | Diabetes mellitus (E10-E14)                                                                                               | X |
|     | Obesity and other hyperalimentation (E65-E68)                                                                             | X |
|     | Metabolic disorders (E70-E90)                                                                                             | X |
| 374 | Hypertensive diseases (I10-I15)                                                                                           | ✓ |
|     | Ischaemic heart diseases (I20-I25)                                                                                        | ✓ |
|     | Other forms of heart disease (I30-I52)                                                                                    | X |
|     | Cerebrovascular diseases (I60-I69)                                                                                        | X |
|     | Arthropathies (M00-M25)                                                                                                   | X |
|     | Dorsopathies (M40-M54)                                                                                                    | X |
| 375 | Table S106: Inclusion and exclusion criteria for cluster 105. Female ratio: 41%, mean age of patients: 69, mortality: 1%. |   |
|     | Malignant neoplasms (C00-C97)                                                                                             | X |
|     | Diabetes mellitus (E10-E14)                                                                                               | X |
|     | Obesity and other hyperalimentation (E65-E68)                                                                             | ✓ |
| 376 | Metabolic disorders (E70-E90)                                                                                             | X |
|     | Hypertensive diseases (I10-I15)                                                                                           | ✓ |
|     | Other forms of heart disease (I30-I52)                                                                                    | X |
|     | Cerebrovascular diseases (I60-I69)                                                                                        | X |
|     | Arthropathies (M00-M25)                                                                                                   | X |
|     | Dorsopathies (M40-M54)                                                                                                    | X |
| 377 | Table S107: Inclusion and exclusion criteria for cluster 106. Female ratio: 52%, mean age of patients: 54, mortality: 0%. |   |
|     | Malignant neoplasms (C00-C97)                                                                                             | X |
|     | Diabetes mellitus (E10-E14)                                                                                               | X |
|     | Metabolic disorders (E70-E90)                                                                                             | X |
| 378 | Hypertensive diseases (I10-I15)                                                                                           | ✓ |
|     | Other forms of heart disease (I30-I52)                                                                                    | X |
|     | Cerebrovascular diseases (I60-I69)                                                                                        | ✓ |
|     | Arthropathies (M00-M25)                                                                                                   | X |
|     | Dorsopathies (M40-M54)                                                                                                    | X |
| 379 | Table S108: Inclusion and exclusion criteria for cluster 107. Female ratio: 50%, mean age of patients: 73, mortality: 2%. |   |
|     | Malignant neoplasms (C00-C97)                                                                                             | X |
|     | Diabetes mellitus (E10-E14)                                                                                               | X |
|     | Metabolic disorders (E70-E90)                                                                                             | X |
| 380 | Hypertensive diseases (I10-I15)                                                                                           | ✓ |
|     | Other forms of heart disease (I30-I52)                                                                                    | X |
|     | Arthropathies (M00-M25)                                                                                                   | X |
|     | Dorsopathies (M40-M54)                                                                                                    | ✓ |
| 381 | Table S109: Inclusion and exclusion criteria for cluster 108. Female ratio: 59%, mean age of patients: 64, mortality: 0%. |   |
|     | Malignant neoplasms (C00-C97)                                                                                             | ✓ |
|     | Diabetes mellitus (E10-E14)                                                                                               | X |
| 382 | Metabolic disorders (E70-E90)                                                                                             | X |
|     | Hypertensive diseases (I10-I15)                                                                                           | ✓ |
|     | Other forms of heart disease (I30-I52)                                                                                    | X |
|     | Arthropathies (M00-M25)                                                                                                   | X |
| 383 | Table S110: Inclusion and exclusion criteria for cluster 109. Female ratio: 48%, mean age of patients: 71, mortality: 4%. |   |
|     | Diabetes mellitus (E10-E14)                                                                                               | X |
|     | Metabolic disorders (E70-E90)                                                                                             | X |
| 384 | Hypertensive diseases (I10-I15)                                                                                           | ✓ |
|     | Other forms of heart disease (I30-I52)                                                                                    | X |
|     | Arthropathies (M00-M25)                                                                                                   | ✓ |
|     | Dorsopathies (M40-M54)                                                                                                    | X |
| 385 | Table S111: Inclusion and exclusion criteria for cluster 110. Female ratio: 59%, mean age of patients: 68, mortality: 1%. |   |

|     |                                        |   |
|-----|----------------------------------------|---|
|     | Diabetes mellitus (E10-E14)            | X |
|     | Metabolic disorders (E70-E90)          | X |
| 386 | Hypertensive diseases (I10-I15)        | ✓ |
|     | Other forms of heart disease (I30-I52) | X |
|     | Arthropathies (M00-M25)                | ✓ |
|     | Dorsopathies (M40-M54)                 | ✓ |

387 Table S112: Inclusion and exclusion criteria for cluster 111. Female ratio: 67%, mean age of patients: 70, mortality: 1%.

|     |                                               |   |
|-----|-----------------------------------------------|---|
|     | Diabetes mellitus (E10-E14)                   | ✓ |
|     | Obesity and other hyperalimentation (E65-E68) | X |
| 388 | Metabolic disorders (E70-E90)                 | X |
|     | Hypertensive diseases (I10-I15)               | ✓ |
|     | Other forms of heart disease (I30-I52)        | X |

389 Table S113: Inclusion and exclusion criteria for cluster 112. Female ratio: 49%, mean age of patients: 71, mortality: 2%.

|     |                                                        |   |
|-----|--------------------------------------------------------|---|
|     | Diabetes mellitus (E10-E14)                            | X |
|     | Metabolic disorders (E70-E90)                          | ✓ |
|     | Hypertensive diseases (I10-I15)                        | ✓ |
| 390 | Ischaemic heart diseases (I20-I25)                     | X |
|     | Other forms of heart disease (I30-I52)                 | X |
|     | Cerebrovascular diseases (I60-I69)                     | X |
|     | Diseases of oesophagus, stomach and duodenum (K20-K31) | X |
|     | Dorsopathies (M40-M54)                                 | X |

391 Table S114: Inclusion and exclusion criteria for cluster 113. Female ratio: 51%, mean age of patients: 65, mortality: 1%.

|     |                                        |   |
|-----|----------------------------------------|---|
|     | Diabetes mellitus (E10-E14)            | X |
|     | Metabolic disorders (E70-E90)          | X |
|     | Hypertensive diseases (I10-I15)        | ✓ |
| 392 | Ischaemic heart diseases (I20-I25)     | X |
|     | Other forms of heart disease (I30-I52) | ✓ |
|     | Cerebrovascular diseases (I60-I69)     | X |
|     | Renal failure (N17-N19)                | X |

393 Table S115: Inclusion and exclusion criteria for cluster 114. Female ratio: 55%, mean age of patients: 74, mortality: 2%.

|     |                                                        |   |
|-----|--------------------------------------------------------|---|
|     | Diabetes mellitus (E10-E14)                            | X |
|     | Metabolic disorders (E70-E90)                          | ✓ |
|     | Hypertensive diseases (I10-I15)                        | ✓ |
| 394 | Ischaemic heart diseases (I20-I25)                     | X |
|     | Other forms of heart disease (I30-I52)                 | X |
|     | Cerebrovascular diseases (I60-I69)                     | X |
|     | Diseases of oesophagus, stomach and duodenum (K20-K31) | ✓ |
|     | Dorsopathies (M40-M54)                                 | X |

395 Table S116: Inclusion and exclusion criteria for cluster 115. Female ratio: 51%, mean age of patients: 65, mortality: 1%.

|     |                                        |   |
|-----|----------------------------------------|---|
|     | Diabetes mellitus (E10-E14)            | X |
|     | Metabolic disorders (E70-E90)          | ✓ |
|     | Hypertensive diseases (I10-I15)        | ✓ |
| 396 | Ischaemic heart diseases (I20-I25)     | X |
|     | Other forms of heart disease (I30-I52) | X |
|     | Cerebrovascular diseases (I60-I69)     | X |
|     | Dorsopathies (M40-M54)                 | ✓ |

397 Table S117: Inclusion and exclusion criteria for cluster 116. Female ratio: 59%, mean age of patients: 66, mortality: 1%.

|     |                                        |   |
|-----|----------------------------------------|---|
|     | Diabetes mellitus (E10-E14)            | X |
|     | Metabolic disorders (E70-E90)          | ✓ |
| 398 | Hypertensive diseases (I10-I15)        | ✓ |
|     | Ischaemic heart diseases (I20-I25)     | X |
|     | Other forms of heart disease (I30-I52) | X |
|     | Cerebrovascular diseases (I60-I69)     | ✓ |

399 Table S118: Inclusion and exclusion criteria for cluster 117. Female ratio: 50%, mean age of patients: 72, mortality: 2%.

|     |                                        |   |
|-----|----------------------------------------|---|
|     | Diabetes mellitus (E10-E14)            | X |
|     | Metabolic disorders (E70-E90)          | ✓ |
| 400 | Hypertensive diseases (I10-I15)        | ✓ |
|     | Ischaemic heart diseases (I20-I25)     | ✓ |
|     | Other forms of heart disease (I30-I52) | X |

401 Table S119: Inclusion and exclusion criteria for cluster 118. Female ratio: 36%, mean age of patients: 67, mortality: 1%.

|     |                                                  |   |
|-----|--------------------------------------------------|---|
|     | Diabetes mellitus (E10-E14)                      | ✓ |
|     | Obesity and other hyperalimentionation (E65-E68) | ✓ |
| 402 | Metabolic disorders (E70-E90)                    | X |
|     | Hypertensive diseases (I10-I15)                  | ✓ |
|     | Other forms of heart disease (I30-I52)           | X |

403 Table S120: Inclusion and exclusion criteria for cluster 119. Female ratio: 54%, mean age of patients: 63, mortality: 1%.

|     |                                        |   |
|-----|----------------------------------------|---|
|     | Diabetes mellitus (E10-E14)            | ✓ |
|     | Metabolic disorders (E70-E90)          | ✓ |
| 404 | Hypertensive diseases (I10-I15)        | ✓ |
|     | Ischaemic heart diseases (I20-I25)     | X |
|     | Other forms of heart disease (I30-I52) | X |

405 Table S121: Inclusion and exclusion criteria for cluster 120. Female ratio: 50%, mean age of patients: 68, mortality: 1%.

|     |                                        |   |
|-----|----------------------------------------|---|
|     | Diabetes mellitus (E10-E14)            | ✓ |
|     | Metabolic disorders (E70-E90)          | X |
| 406 | Hypertensive diseases (I10-I15)        | ✓ |
|     | Ischaemic heart diseases (I20-I25)     | X |
|     | Other forms of heart disease (I30-I52) | ✓ |
|     | Cerebrovascular diseases (I60-I69)     | X |
|     | Renal failure (N17-N19)                | X |

407 Table S122: Inclusion and exclusion criteria for cluster 121. Female ratio: 55%, mean age of patients: 77, mortality: 3%.

|     |                                        |   |
|-----|----------------------------------------|---|
|     | Metabolic disorders (E70-E90)          | ✓ |
|     | Hypertensive diseases (I10-I15)        | ✓ |
| 408 | Ischaemic heart diseases (I20-I25)     | X |
|     | Other forms of heart disease (I30-I52) | ✓ |
|     | Cerebrovascular diseases (I60-I69)     | X |
|     | Renal failure (N17-N19)                | X |

409 Table S123: Inclusion and exclusion criteria for cluster 122. Female ratio: 55%, mean age of patients: 73, mortality: 2%.

|     |                                        |   |
|-----|----------------------------------------|---|
|     | Hypertensive diseases (I10-I15)        | ✓ |
|     | Ischaemic heart diseases (I20-I25)     | X |
| 410 | Other forms of heart disease (I30-I52) | ✓ |
|     | Cerebrovascular diseases (I60-I69)     | ✓ |
|     | Renal failure (N17-N19)                | X |

411 Table S124: Inclusion and exclusion criteria for cluster 123. Female ratio: 59%, mean age of patients: 80, mortality: 5%.

|     |                                        |   |
|-----|----------------------------------------|---|
|     | Diabetes mellitus (E10-E14)            | X |
|     | Metabolic disorders (E70-E90)          | X |
|     | Hypertensive diseases (I10-I15)        | ✓ |
| 412 | Ischaemic heart diseases (I20-I25)     | ✓ |
|     | Other forms of heart disease (I30-I52) | ✓ |
|     | Cerebrovascular diseases (I60-I69)     | X |
|     | Renal failure (N17-N19)                | X |

413 Table S125: Inclusion and exclusion criteria for cluster 124. Female ratio: 50%, mean age of patients: 77, mortality: 3%.

|     |                                        |   |
|-----|----------------------------------------|---|
|     | Diabetes mellitus (E10-E14)            | X |
|     | Metabolic disorders (E70-E90)          | ✓ |
|     | Hypertensive diseases (I10-I15)        | ✓ |
| 414 | Ischaemic heart diseases (I20-I25)     | ✓ |
|     | Other forms of heart disease (I30-I52) | ✓ |
|     | Cerebrovascular diseases (I60-I69)     | X |
|     | Renal failure (N17-N19)                | X |

415 Table S126: Inclusion and exclusion criteria for cluster 125. Female ratio: 43%, mean age of patients: 73, mortality: 2%.

|     |                                        |   |
|-----|----------------------------------------|---|
|     | Diabetes mellitus (E10-E14)            | ✓ |
|     | Metabolic disorders (E70-E90)          | ✓ |
| 416 | Hypertensive diseases (I10-I15)        | ✓ |
|     | Ischaemic heart diseases (I20-I25)     | ✓ |
|     | Other forms of heart disease (I30-I52) | X |

417 Table S127: Inclusion and exclusion criteria for cluster 126. Female ratio: 36%, mean age of patients: 69, mortality: 2%.

|     |                                        |   |
|-----|----------------------------------------|---|
|     | Diabetes mellitus (E10-E14)            | ✓ |
|     | Hypertensive diseases (I10-I15)        | ✓ |
| 418 | Ischaemic heart diseases (I20-I25)     | ✓ |
|     | Other forms of heart disease (I30-I52) | ✓ |
|     | Cerebrovascular diseases (I60-I69)     | X |
|     | Renal failure (N17-N19)                | X |

419 Table S128: Inclusion and exclusion criteria for cluster 127. Female ratio: 45%, mean age of patients: 75, mortality: 4%.

|     |                                        |   |
|-----|----------------------------------------|---|
|     | Hypertensive diseases (I10-I15)        | ✓ |
|     | Ischaemic heart diseases (I20-I25)     | ✓ |
| 420 | Other forms of heart disease (I30-I52) | ✓ |
|     | Cerebrovascular diseases (I60-I69)     | ✓ |
|     | Renal failure (N17-N19)                | X |

421 Table S129: Inclusion and exclusion criteria for cluster 128. Female ratio: 52%, mean age of patients: 80, mortality: 6%.

|     |                                                            |   |
|-----|------------------------------------------------------------|---|
|     | Organic, including symptomatic, mental disorders (F00-F09) | X |
|     | Hypertensive diseases (I10-I15)                            | ✓ |
| 422 | Other forms of heart disease (I30-I52)                     | ✓ |
|     | Diseases of arteries, arterioles and capillaries (I70-I79) | X |
|     | Renal failure (N17-N19)                                    | ✓ |

423 Table S130: Inclusion and exclusion criteria for cluster 129. Female ratio: 52%, mean age of patients: 80, mortality: 8%.

|     |                                                            |   |
|-----|------------------------------------------------------------|---|
|     | Organic, including symptomatic, mental disorders (F00-F09) | ✓ |
|     | Hypertensive diseases (I10-I15)                            | ✓ |
| 424 | Other forms of heart disease (I30-I52)                     | ✓ |
|     | Diseases of arteries, arterioles and capillaries (I70-I79) | X |
|     | Renal failure (N17-N19)                                    | ✓ |

425 Table S131: Inclusion and exclusion criteria for cluster 130. Female ratio: 65%, mean age of patients: 86, mortality: 10%.

|     |                                                            |   |
|-----|------------------------------------------------------------|---|
|     | Hypertensive diseases (I10-I15)                            | ✓ |
|     | Other forms of heart disease (I30-I52)                     | ✓ |
| 426 | Diseases of arteries, arterioles and capillaries (I70-I79) | ✓ |
|     | Renal failure (N17-N19)                                    | ✓ |

427 Table S132: Inclusion and exclusion criteria for cluster 131. Female ratio: 49%, mean age of patients: 81, mortality: 11%.

|            |     | Absolute risk/% |           |           |           |
|------------|-----|-----------------|-----------|-----------|-----------|
|            |     | 50-59           | 60-69     | 70-79     |           |
| Cluster ID | 112 | m               | 1.6 ± 0.2 | 2.5 ± 0.2 | 4.3 ± 0.2 |
|            |     | f               | 1.0 ± 0.2 | 1.7 ± 0.2 | 3.7 ± 0.2 |
|            | 119 | m               | 1.8 ± 0.3 | 3.2 ± 0.4 | 5.3 ± 0.7 |
|            |     | f               | 1.2 ± 0.3 | 2.6 ± 0.4 | 4.6 ± 0.5 |
|            | 120 | m               | 1.7 ± 0.2 | 2.6 ± 0.2 | 4.5 ± 0.3 |
|            |     | f               | 1.2 ± 0.2 | 2.2 ± 0.2 | 3.9 ± 0.3 |

Table S133: Absolute risk of stepping into the high cardiovascular mortality region within one year for patients in clusters 112, 119 and 120.

|            |     | Relative risk (all patients) |             |             | Relative risk (cluster 0) |             |             |             |
|------------|-----|------------------------------|-------------|-------------|---------------------------|-------------|-------------|-------------|
|            |     | 50-59                        | 60-69       | 70-79       | 50-59                     | 60-69       | 70-79       |             |
| Cluster ID | 112 | m                            | 1.96 ± 0.11 | 1.57 ± 0.06 | 1.38 ± 0.05               | 1.58 ± 0.11 | 1.34 ± 0.06 | 1.20 ± 0.05 |
|            |     | f                            | 2.60 ± 0.18 | 1.71 ± 0.10 | 1.49 ± 0.05               | 2.05 ± 0.18 | 1.46 ± 0.10 | 1.39 ± 0.06 |
|            | 119 | m                            | 2.24 ± 0.19 | 1.99 ± 0.12 | 1.73 ± 0.12               | 1.81 ± 0.19 | 1.70 ± 0.12 | 1.50 ± 0.12 |
|            |     | f                            | 2.93 ± 0.24 | 2.58 ± 0.14 | 1.86 ± 0.11               | 2.30 ± 0.24 | 2.21 ± 0.14 | 1.73 ± 0.11 |
|            | 120 | m                            | 2.09 ± 0.12 | 1.58 ± 0.08 | 1.47 ± 0.07               | 1.68 ± 0.12 | 1.35 ± 0.08 | 1.28 ± 0.07 |
|            |     | f                            | 3.04 ± 0.18 | 2.17 ± 0.10 | 1.59 ± 0.07               | 2.39 ± 0.18 | 1.86 ± 0.10 | 1.48 ± 0.07 |

Table S134: Relative risks for patients in clusters 112, 119 and 120 to step into the high cardiovascular mortality region within one year, compared with all patients of the same sex and age group who have not been assigned to the high cardiovascular mortality region (left) and patients of the same sex and age group in cluster 0 where patients have not been assigned any hospital diagnoses yet (right).

|             | $\ \mathbf{w} \circ \hat{\mathbf{p}}\ _1 / \ \mathbf{w} \circ \mathbf{p}\ _1$ | $\ \Delta \mathbf{p}\ _1$ | $\ \Delta \mathbf{p}\ _2$ | $f$  |
|-------------|-------------------------------------------------------------------------------|---------------------------|---------------------------|------|
| Benchmark 1 | 84%                                                                           | 0.29                      | 0.042                     | 0.55 |
| Benchmark 2 | 90%                                                                           | 0.18                      | 0.033                     | 0.48 |
| DIVCLUS-T   | 96%                                                                           | 0.11                      | 0.017                     | 0.48 |

Table S135: Comparison of the performance of our approach to modeling patient trajectories based on clustering patients using DIVCLUS-T and two other benchmark algorithms. The meaning of the different quantities is explained in section S5.

| Age gr. | Source | Target | Rate female> | Baseline< | Rate male< | Inclusion diag. source | New diag. |
|---------|--------|--------|--------------|-----------|------------|------------------------|-----------|
| 0       | 23     | 38     | 0.0196       | 0.0065    | 0.0097     | N10-N16                | N30-N39   |
| 1       | 4      | 41     | 0.0104       | 0.0044    | 0.0094     | F90-F98                | F40-F48   |
| 1       | 12     | 92     | 0.0109       | 0.0087    | 0.0109     | B25-B34                | J30-J39   |
| 1       | 52     | 63     | 0.0020       | 0.0016    | 0.0013     | K35-K38                | M40-M54   |
| 1       | 52     | 92     | 0.0088       | 0.0087    | 0.0061     | K35-K38                | J30-J39   |
| 1       | 53     | 100    | 0.0101       | 0.0087    | 0.0081     | J00-J06                | J30-J39   |
| 1       | 61     | 77     | 0.0043       | 0.0042    | 0.0042     | I80-I89                | A00-A09   |
| 1       | 64     | 69     | 0.0077       | 0.0044    | 0.0066     | F10-F19                | F40-F48   |
| 1       | 72     | 76     | 0.0030       | 0.0023    | 0.0027     | K55-K63                | K20-K31   |
| 2       | 35     | 52     | 0.0034       | 0.0027    | 0.0031     | K20-K31                | K35-K38   |
| 2       | 63     | 77     | 0.0026       | 0.0022    | 0.0019     | M40-M54                | A00-A09   |
| 2       | 77     | 80     | 0.0021       | 0.0017    | 0.0020     | A00-A09                | J00-J06   |
| 2       | 92     | 93     | 0.0028       | 0.0028    | 0.0020     | J30-J39                | D10-D36   |
| 2       | 92     | 94     | 0.0023       | 0.0019    | 0.0021     | J30-J39                | K00-K14   |
| 2       | 92     | 95     | 0.0022       | 0.0022    | 0.0021     | J30-J39                | A00-A09   |
| 2       | 102    | 106    | 0.0038       | 0.0015    | 0.0037     | I10-I15                | E65-E68   |
| 3       | 17     | 27     | 0.0055       | 0.0027    | 0.0052     | F20-F29                | F30-F39   |
| 3       | 27     | 41     | 0.0080       | 0.0028    | 0.0076     | F30-F39                | F40-F48   |
| 3       | 35     | 42     | 0.0028       | 0.0025    | 0.0026     | K20-K31                | K80-K87   |
| 3       | 63     | 65     | 0.0038       | 0.0027    | 0.0025     | M40-M54                | F30-F39   |
| 3       | 69     | 71     | 0.0159       | 0.0027    | 0.0147     | F10-F19, F40-F48       | F30-F39   |
| 3       | 72     | 75     | 0.0044       | 0.0041    | 0.0043     | K55-K63                | I80-I89   |

| Age gr. | Source | Target | Rate female> | Baseline< | Rate male< | Inclusion diag. source             | New diag. |
|---------|--------|--------|--------------|-----------|------------|------------------------------------|-----------|
| 3       | 92     | 93     | 0.0047       | 0.0046    | 0.0025     | J30-J39                            | D10-D36   |
| 3       | 92     | 95     | 0.0014       | 0.0014    | 0.0013     | J30-J39                            | A00-A09   |
| 4       | 27     | 41     | 0.0080       | 0.0038    | 0.0067     | F30-F39                            | F40-F48   |
| 4       | 34     | 50     | 0.0092       | 0.0053    | 0.0077     | G50-G59                            | M60-M79   |
| 4       | 50     | 63     | 0.0078       | 0.0077    | 0.0067     | M60-M79                            | M40-M54   |
| 4       | 64     | 69     | 0.0051       | 0.0038    | 0.0035     | F10-F19                            | F40-F48   |
| 4       | 64     | 71     | 0.0107       | 0.0049    | 0.0070     | F10-F19                            | F30-F39   |
| 4       | 69     | 71     | 0.0226       | 0.0049    | 0.0205     | F10-F19, F40-F48                   | F30-F39   |
| 4       | 70     | 71     | 0.0166       | 0.0049    | 0.0141     | F10-F19, K70-K77                   | F30-F39   |
| 4       | 85     | 88     | 0.0081       | 0.0077    | 0.0076     | M00-M25                            | M40-M54   |
| 4       | 85     | 89     | 0.0100       | 0.0053    | 0.0096     | M00-M25                            | M60-M79   |
| 4       | 92     | 96     | 0.0022       | 0.0017    | 0.0021     | J30-J39                            | J40-J47   |
| 4       | 102    | 108    | 0.0084       | 0.0077    | 0.0061     | I10-I15                            | M40-M54   |
| 4       | 108    | 111    | 0.0145       | 0.0070    | 0.0144     | I10-I15, M40-M54                   | M00-M25   |
| 4       | 110    | 111    | 0.0152       | 0.0077    | 0.0139     | I10-I15, M00-M25                   | M40-M54   |
| 4       | 112    | 119    | 0.0144       | 0.0030    | 0.0100     | E10-E14, I10-I15                   | E65-E68   |
| 5       | 34     | 50     | 0.0130       | 0.0094    | 0.0108     | G50-G59                            | M60-M79   |
| 5       | 85     | 89     | 0.0127       | 0.0094    | 0.0126     | M00-M25                            | M60-M79   |
| 5       | 85     | 90     | 0.0046       | 0.0046    | 0.0042     | M00-M25                            | M80-M94   |
| 5       | 86     | 90     | 0.0077       | 0.0046    | 0.0057     | E70-E90, M00-M25                   | M80-M94   |
| 5       | 88     | 89     | 0.0235       | 0.0094    | 0.0217     | M00-M25, M40-M54                   | M60-M79   |
| 5       | 88     | 90     | 0.0087       | 0.0046    | 0.0061     | M00-M25, M40-M54                   | M80-M94   |
| 5       | 89     | 91     | 0.0101       | 0.0046    | 0.0087     | M00-M25, M60-M79                   | M80-M94   |
| 5       | 90     | 91     | 0.0205       | 0.0094    | 0.0175     | M00-M25, M80-M94                   | M60-M79   |
| 5       | 108    | 111    | 0.0225       | 0.0149    | 0.0215     | I10-I15, M40-M54                   | M00-M25   |
| 5       | 110    | 111    | 0.0164       | 0.0113    | 0.0157     | I10-I15, M00-M25                   | M40-M54   |
| 5       | 112    | 119    | 0.0119       | 0.0055    | 0.0101     | E10-E14, I10-I15                   | E65-E68   |
| 5       | 113    | 116    | 0.0141       | 0.0113    | 0.0133     | E70-E90, I10-I15                   | M40-M54   |
| 6       | 88     | 90     | 0.0101       | 0.0080    | 0.0060     | M00-M25, M40-M54                   | M80-M94   |
| 6       | 89     | 91     | 0.0111       | 0.0080    | 0.0066     | M00-M25, M60-M79                   | M80-M94   |
| 6       | 108    | 111    | 0.0241       | 0.0190    | 0.0213     | I10-I15, M40-M54                   | M00-M25   |
| 6       | 110    | 111    | 0.0156       | 0.0123    | 0.0135     | I10-I15, M00-M25                   | M40-M54   |
| 6       | 111    | 116    | 0.0196       | 0.0173    | 0.0192     | I10-I15, M00-M25, M40-M54          | E70-E90   |
| 6       | 112    | 119    | 0.0084       | 0.0070    | 0.0075     | E10-E14, I10-I15                   | E65-E68   |
| 6       | 113    | 116    | 0.0128       | 0.0123    | 0.0114     | E70-E90, I10-I15                   | M40-M54   |
| 6       | 115    | 116    | 0.0177       | 0.0123    | 0.0163     | E70-E90, I10-I15, K20-K31          | M40-M54   |
| 7       | 15     | 45     | 0.0508       | 0.0248    | 0.0493     | H30-H36                            | H25-H28   |
| 7       | 50     | 89     | 0.0218       | 0.0210    | 0.0210     | M60-M79                            | M00-M25   |
| 7       | 88     | 90     | 0.0156       | 0.0140    | 0.0093     | M00-M25, M40-M54                   | M80-M94   |
| 7       | 108    | 111    | 0.0295       | 0.0210    | 0.0270     | I10-I15, M40-M54                   | M00-M25   |
| 7       | 110    | 111    | 0.0214       | 0.0160    | 0.0161     | I10-I15, M00-M25                   | M40-M54   |
| 7       | 113    | 116    | 0.0177       | 0.0160    | 0.0120     | E70-E90, I10-I15                   | M40-M54   |
| 7       | 115    | 116    | 0.0221       | 0.0160    | 0.0165     | E70-E90, I10-I15, K20-K31          | M40-M54   |
| 7       | 129    | 130    | 0.0125       | 0.0072    | 0.0123     | I10-I15, I30-I52, N17-N19          | F00-F09   |
| 8       | 88     | 90     | 0.0218       | 0.0199    | 0.0096     | M00-M25, M40-M54                   | M80-M94   |
| 8       | 110    | 111    | 0.0183       | 0.0165    | 0.0165     | I10-I15, M00-M25                   | M40-M54   |
| 8       | 124    | 128    | 0.0225       | 0.0220    | 0.0204     | I10-I15, I20-I25, I30-I52          | I60-I69   |
| 8       | 127    | 128    | 0.0249       | 0.0220    | 0.0231     | E10-E14, I10-I15, I20-I25, I30-I52 | I60-I69   |

Table S136: Cluster transitions which are significantly overrepresented in females compared with males. The columns ‘Source’ and ‘Target’ give the labels of the source and target cluster of the corresponding transition, ‘Rate female>’ gives the lower bound of the 95% confidence interval for the rate at which females of the corresponding age group step from the source cluster to the target cluster; ‘Rate male<’ gives the upper bound of the 95% confidence interval of the same rate for males. The column ‘Inclusion diag. source’ gives the inclusion criteria of the source cluster, ‘New diag.’ denotes the diagnoses which patients acquire when stepping from the source to the target cluster. The column ‘Baseline<’ gives the upper boundary of the 95% confidence interval of the incidence of the diagnosis block in the column ‘New diag.’ for women of the corresponding age group. To exclude trivial results, only transitions made by at least 20 male patients are listed.

| Age gr. | Source | Target | Rate male> | Baseline< | Rate female< | Inclusion diag. source | New diag.        |
|---------|--------|--------|------------|-----------|--------------|------------------------|------------------|
| 0       | 54     | 101    | 0.0171     | 0.0154    | 0.0156       | J00-J06, J20-J22       | J30-J39, H65-H75 |
| 0       | 78     | 99     | 0.0172     | 0.0154    | 0.0164       | A00-A09, J20-J22       | J30-J39, H65-H75 |
| 0       | 80     | 101    | 0.0228     | 0.0154    | 0.0185       | A00-A09, J00-J06       | J30-J39, H65-H75 |
| 2       | 0      | 52     | 0.0032     | 0.0031    | 0.0024       | None                   | K35-K38          |
| 2       | 17     | 64     | 0.0149     | 0.0072    | 0.0091       | F20-F29                | F10-F19          |
| 2       | 23     | 40     | 0.0060     | 0.0016    | 0.0023       | N10-N16                | N20-N23          |
| 2       | 27     | 71     | 0.0125     | 0.0072    | 0.0091       | F30-F39                | F10-F19          |
| 2       | 50     | 89     | 0.0066     | 0.0053    | 0.0057       | M60-M79                | M00-M25          |
| 2       | 64     | 70     | 0.0010     | 0.0010    | 0.0010       | F10-F19                | K70-K77          |
| 2       | 64     | 71     | 0.0050     | 0.0023    | 0.0049       | F10-F19                | F30-F39          |
| 2       | 85     | 90     | 0.0031     | 0.0015    | 0.0025       | M00-M25                | M80-M94          |
| 3       | 23     | 40     | 0.0057     | 0.0026    | 0.0034       | N10-N16                | N20-N23          |

| Age gr. | Source | Target | Rate male> | Baseline< | Rate female< | Inclusion diag. source             | New diag.        |
|---------|--------|--------|------------|-----------|--------------|------------------------------------|------------------|
| 3       | 27     | 71     | 0.0115     | 0.0067    | 0.0086       | F30–F39                            | F10–F19          |
| 3       | 49     | 98     | 0.0087     | 0.0071    | 0.0042       | G40–G47                            | J30–J39          |
| 3       | 64     | 70     | 0.0034     | 0.0024    | 0.0021       | F10–F19                            | K70–K77          |
| 3       | 102    | 113    | 0.0056     | 0.0043    | 0.0055       | I10–I15                            | E70–E90          |
| 4       | 27     | 71     | 0.0102     | 0.0085    | 0.0091       | F30–F39                            | F10–F19          |
| 4       | 36     | 72     | 0.0070     | 0.0063    | 0.0068       | K50–K52                            | K55–K63          |
| 4       | 49     | 98     | 0.0073     | 0.0052    | 0.0031       | G40–G47                            | J30–J39          |
| 4       | 50     | 89     | 0.0126     | 0.0103    | 0.0126       | M60–M79                            | M00–M25          |
| 4       | 64     | 70     | 0.0068     | 0.0043    | 0.0043       | F10–F19                            | K70–K77          |
| 5       | 44     | 45     | 0.0092     | 0.0017    | 0.0073       | H25–H28                            | H30–H36          |
| 5       | 49     | 98     | 0.0052     | 0.0040    | 0.0034       | G40–G47                            | J30–J39          |
| 5       | 62     | 76     | 0.0153     | 0.0101    | 0.0126       | I80–I89, K20–K31                   | K55–K63          |
| 5       | 67     | 118    | 0.0103     | 0.0101    | 0.0092       | E70–E90, F10–F19                   | I10–I15, I20–I25 |
| 5       | 112    | 126    | 0.0107     | 0.0101    | 0.0089       | E10–E14, I10–I15                   | E70–E90, I20–I25 |
| 5       | 114    | 129    | 0.0045     | 0.0022    | 0.0043       | I10–I15, I30–I52                   | N17–N19          |
| 5       | 116    | 118    | 0.0102     | 0.0101    | 0.0085       | E70–E90, I10–I15, M40–M54          | I20–I25          |
| 5       | 117    | 118    | 0.0116     | 0.0101    | 0.0084       | E70–E90, I10–I15, I60–I69          | I20–I25          |
| 5       | 119    | 126    | 0.0103     | 0.0101    | 0.0101       | E10–E14, E65–E68, I10–I15          | E70–E90, I20–I25 |
| 5       | 120    | 126    | 0.0162     | 0.0101    | 0.0142       | E10–E14, E70–E90, I10–I15          | I20–I25          |
| 5       | 122    | 125    | 0.0145     | 0.0101    | 0.0141       | E70–E90, I10–I15, I30–I52          | I20–I25          |
| 6       | 20     | 56     | 0.0272     | 0.0167    | 0.0201       | D37–D48                            | C00–C97          |
| 6       | 120    | 126    | 0.0167     | 0.0162    | 0.0158       | E10–E14, E70–E90, I10–I15          | I20–I25          |
| 6       | 127    | 131    | 0.0099     | 0.0054    | 0.0091       | E10–E14, I10–I15, I20–I25, I30–I52 | I70–I79, N17–N19 |
| 7       | 129    | 131    | 0.0232     | 0.0116    | 0.0232       | I10–I15, I30–I52, N17–N19          | I70–I79          |
| 8       | 103    | 109    | 0.0214     | 0.0213    | 0.0179       | H25–H28, I10–I15                   | C00–C97          |

Table S137: Cluster transitions which are significantly overrepresented in males compared with females. The columns ‘Source’ and ‘Target’ give the labels of the source and target cluster of the corresponding transition, ‘Rate male>’ gives the lower bound of the 95% confidence interval for the rate at which males of the corresponding age group step from the source cluster to the target cluster; ‘Rate female<’ gives the upper bound of the 95% confidence interval of the same rate for females. The column ‘Inclusion diag. source’ gives the inclusion criteria of the source cluster, ‘New diag.’ denotes the diagnoses which patients acquire when stepping from the source to the target cluster. The column ‘Baseline<’ gives the upper boundary of the 95% confidence interval of the incidence of the diagnosis block in the column ‘New diag.’ for men of the corresponding age group. If two blocks are in the columns ‘New diag.’, the smaller incidence value is given. To exclude trivial results, only transitions made by at least 20 female patients are listed.

428 **References**

- 429 [1] Marie Chavent, Yves Lechevallier, and Olivier Briant. DIVCLUS-T: A monothetic divisive hierarchical  
430 clustering method. *Computational Statistics and Data Analysis*, 52(2):687–701, 2007. ISSN 01679473.  
431 doi: 10.1016/j.csda.2007.03.013.
- 432 [2] Joe H Ward, Jr. Hierarchical grouping to optimize an objective function. *Journal of the American*  
433 *Statistical Association*, 58(301):236–244, 1963.
- 434 [3] David J. C. MacKay. *Information Theory, Inference, and Learning Algorithms*. Cambridge University  
435 Press, 2005.
- 436 [4] Christopher D. Manning, Prabhakar Raghavan, and Hinrich Schütze. *An Introduction to Information*  
437 *Retrieval*. Cambridge University Press, 2009.
